# Supplementary material for: Auxin production in the endosperm drives seed coat development in Arabidopsis
Source: eLife. 2016 Nov 16;5:e20542. doi: 10.7554/eLife.20542 (PMC5135394; doi:10.7554/eLife.20542)
Supplement: Table 1—source data 1. — This table includes absolute and relative gene expression values for the microarray data of WT vs. vrn2/- emf2/+ ovules and seeds, and for the mRNAseq data of WT vs. agl62/+ seeds. DOI: http://dx.doi.org/10.7554/eLife.20542.004 [file elife-20542-table1-data1.xlsx]

## Sheet: Sheet1
Model name	Short_description	Absolute_mean_values			WT4DAE_vs_vrn2emf24DAE		WT4DAE_vs_WT2DAP		Absolute_mean_values		agl62_vs_WT
		vrn2emf2_4DAE	WT_2DAP	WT_4DAE	log2FoldChange	pvalueadjusted	log2FoldChange	pvalueadjusted	WT_30HAP	agl62_30HAP	log2FoldChange	pvalueadjusted
AT1G01010	"ANAC001 (Arabidopsis NAC domain containing protein 1); transcription factor"	4.93238	5.01055	5.12711	-0.194727	0.0290905	-0.116564	0.0814647	655	785	0.262	0.942
AT1G01020	ARV1	4.4108	3.60827	4.08425	0.326554	0.0270185	-0.475981	0.000448693	19.8	48.4	1.29	0.214
AT1G01030	"NGA3 (NGATHA3); transcription factor"	3.55918	3.57546	3.83726	-0.278081	0.0367712	-0.261809	0.0213584	10.3	20.9	1.02	0.408
AT1G01040	"DCL1 (DICER-LIKE1); ATP-dependent helicase/ ribonuclease III"	4.8348	4.51896	4.7831	0.0516992	0.301445	-0.264143	0.0051495	5030	5490	0.127	0.53
AT1G01046	"MIR838a; miRNA"	3.77125	3.25782	3.52438	0.246863	0.131907	-0.266564	0.0908393	37.7	34.4	-0.129	1
AT1G01050	"ATPPA1 (ARABIDOPSIS THALIANA PYROPHOSPHORYLASE 1); inorganic diphosphatase/ pyrophosphatase"	7.63618	7.63382	7.40146	0.23472	0.0191267	0.23236	0.00634264	4510	4340	-0.0559	1
AT1G01060	"LHY (LATE ELONGATED HYPOCOTYL); DNA binding / transcription factor"	3.98178	4.43993	4.10721	-0.125437	0.134382	0.332714	0.00478448	546	634	0.214	0.978
AT1G01070	nodulin MtN21 family protein	4.07739	3.43189	3.74555	0.331846	0.072807	-0.313661	0.035444	0.568	2.17	1.94	0.98
AT1G01080	33 kDa ribonucleoprotein, chloroplast, putative / RNA-binding protein cp33, putative	6.22626	6.27585	5.9286	0.297658	0.0151998	0.347242	0.00303757	902	922	0.0319	0.967
AT1G01090	"PDH-E1 ALPHA (PYRUVATE DEHYDROGENASE E1 ALPHA); pyruvate dehydrogenase (acetyl-transferring)"	8.97309	9.60638	9.11672	-0.143628	0.0882054	0.489662	0.00046504	11700	10300	-0.181	0.0951
AT1G01100	60S acidic ribosomal protein P1 (RPP1A)	10.5627	10.7703	10.201	0.361689	0.00381778	0.569367	0.000140075	24300	20700	-0.23	0.0494
AT1G01110	IQD18 (IQ-domain 18)	5.44046	4.25525	4.86366	0.576794	0.000776654	-0.608409	0.000127041	419	406	-0.0451	1
AT1G01120	"KCS1 (3-KETOACYL-COA SYNTHASE 1); acyltransferase"	6.76267	7.4461	7.3692	-0.606524	0.00134611	0.0768981	0.137662	6240	5720	-0.125	0.5
AT1G01130	NA	6.44384	5.87986	6.1207	0.32314	0.171783	-0.240838	0.166308	200	178	-0.167	1
AT1G01140	"CIPK9 (CBL-INTERACTING PROTEIN KINASE 9); kinase"	6.92622	5.54884	7.61124	-0.685022	0.000577459	-2.0624	5.5e-06	2230	2850	0.36	0.763
AT1G01150	DNA binding / zinc ion binding	3.38481	3.30295	3.35177	0.0330345	0.362051	-0.0488242	0.219864	17.4	9.66	-0.847	0.884
AT1G01160	GIF2 (GRF1-INTERACTING FACTOR 2)	8.66541	8.07978	8.26406	0.401349	0.00312032	-0.184283	0.0204424	3470	3470	0.00209	1
AT1G01170	ozone-responsive stress-related protein, putative	9.08319	7.51319	8.85377	0.229418	0.0589834	-1.34058	1.81e-06	443	644	0.542	0.0103
AT1G01180	NA	5.79853	4.05536	6.44325	-0.644715	0.00122797	-2.38788	1.1e-07	9.09	9.33	0.0377	1
AT1G01183	"MIR165/MIR165A; miRNA"	3.22578	3.9031	3.40839	-0.182608	0.199952	0.494712	0.003204	0.651	0	0	1
AT1G01190	"CYP78A8 (cytochrome P450, family 78, subfamily A, polypeptide 8); oxygen binding"	4.12554	4.00775	3.9697	0.155843	0.126526	0.0380443	0.266475	10.1	23.1	1.19	0.566
AT1G01200	"AtRABA3 (Arabidopsis Rab GTPase homolog A3); GTP binding"	4.19254	4.32529	4.30222	-0.109676	0.234904	0.0230708	0.323547	8.99	10	0.161	1
AT1G01210	DNA-directed RNA polymerase III family protein	5.38108	5.29919	5.11462	0.266457	0.125086	0.184567	0.0784108	636	463	-0.46	0.00931
AT1G01220	GHMP kinase-related	5.09401	5.31293	5.28166	-0.187649	0.044184	0.0312734	0.264372	2520	2560	0.0185	0.998
AT1G01225	NC domain-containing protein-related	5.72945	6.03398	5.98783	-0.258377	0.00645254	0.0461532	0.206644	438	477	0.122	0.778
AT1G01230	ORMDL family protein	7.86485	7.79223	7.74757	0.117275	0.124103	0.0446605	0.232108	1630	1570	-0.051	0.929
AT1G01240	NA	8.21918	5.80779	8.85126	-0.632083	0.000368337	-3.04347	9.18e-08	296	718	1.28	0.000555
AT1G01250	AP2 domain-containing transcription factor, putative	4.19593	5.09721	4.12296	0.0729682	0.276903	0.974248	1.42e-05	63.3	80.1	0.341	0.737
AT1G01260	basic helix-loop-helix (bHLH) family protein	5.18708	5.31058	5.25935	-0.0722726	0.275762	0.0512332	0.241027	2580	2390	-0.112	0.756
AT1G01280	"CYP703/CYP703A2 (CYTOCHROME P450, FAMILY 703, SUBFAMILY A, POLYPEPTIDE 2); oxidoreductase, acting on paired donors, with incorporation or reduction of molecular oxygen, NADH or NADPH as one donor, and incorporation of one atom of oxygen / oxygen binding"	3.38299	3.51848	3.42124	-0.0382537	0.336007	0.0972364	0.106959	0	0	0	0
AT1G01290	"CNX3 (COFACTOR OF NITRATE REDUCTASE AND XANTHINE DEHYDROGENASE 3); catalytic"	7.19177	7.11382	6.70319	0.48858	0.000887081	0.410634	0.000245751	1170	1040	-0.171	0.536
AT1G01300	aspartyl protease family protein	8.04658	8.82239	7.58763	0.458957	0.00142888	1.23477	2.17e-06	10300	9990	-0.0497	0.714
AT1G01305	unknown protein	8.57023	4.37262	8.68075	-0.110524	0.145831	-4.30813	3.56e-08	2.27	20.1	3.15	0.0225
AT1G01310	allergen V5/Tpx-1-related family protein	3.88065	4.31622	3.66194	0.218712	0.0273882	0.654285	0.000345981	16.8	14.7	-0.195	1
AT1G01320	tetratricopeptide repeat (TPR)-containing protein	4.57509	4.21687	5.02875	-0.453654	0.0030747	-0.811871	3.29e-05	2620	2580	-0.0239	1
AT1G01340	"ATCNGC10 (CYCLIC NUCLEOTIDE GATED CHANNEL 10); calmodulin binding / cyclic nucleotide binding / ion channel"	3.69133	3.72182	3.79787	-0.106545	0.124526	-0.0760509	0.163072	23.2	20.3	-0.191	1
AT1G01350	nucleic acid binding	4.9963	5.10978	4.95543	0.0408643	0.409388	0.154346	0.0846508	2190	2060	-0.0916	0.86
AT1G01355	nucleic acid binding / zinc ion binding	4.52032	3.82171	3.88813	0.632184	0.00118433	-0.0664167	0.208448	3.81	9.92	1.38	0.522
AT1G01360	NA	8.93603	6.98866	8.84451	0.0915216	0.16699	-1.85585	1.1e-07	759	1040	0.455	0.465
AT1G01370	"HTR12 (CENTROMERIC HISTONE H3); DNA binding"	5.30393	6.20829	4.8648	0.439131	0.00205148	1.34349	2.05e-06	1140	1030	-0.157	0.624
AT1G01380	"ETC1 (ENHANCER OF TRY AND CPC 1); DNA binding / transcription factor"	3.58052	3.62626	3.47586	0.104661	0.181819	0.150396	0.0549701	1.63	7.11	2.13	0.586
AT1G01390	UDP-glucoronosyl/UDP-glucosyl transferase family protein	3.3988	3.36052	3.33322	0.0655839	0.269456	0.0272973	0.276493	0.894	1.86	1.06	1
AT1G01400	unknown protein	3.54872	3.75156	3.55451	-0.00579795	0.461404	0.197046	0.0226891	0	0	0	0
AT1G01410	"APUM22 (ARABIDOPSIS PUMILIO 22); RNA binding / binding"	3.31624	3.3406	3.18638	0.129855	0.136661	0.154211	0.0452003	0	0	0	0
AT1G01420	UDP-glucoronosyl/UDP-glucosyl transferase family protein	3.90511	3.93536	4.01203	-0.106914	0.164547	-0.0766632	0.18164	202	174	-0.215	0.936
AT1G01430	NA	6.76202	7.71804	6.76627	-0.00425193	0.460712	0.951769	1.96e-05	9940	8800	-0.175	0.162
AT1G01440	extra-large G-protein-related	5.33733	4.95973	5.80508	-0.467747	0.0016729	-0.845345	1.58e-05	1150	1140	-0.017	0.991
AT1G01448	other RNA	4.16574	4.0356	4.33298	-0.167238	0.1023	-0.297383	0.00962713	429	443	0.0445	1
AT1G01450	protein kinase-related	3.41696	3.29072	3.45406	-0.037099	0.33872	-0.163336	0.0244817	24.3	21.8	-0.154	1
AT1G01453	NA	3.47628	3.32134	3.30444	0.171842	0.0663206	0.0169078	0.314167	0.242	2.42	3.32	0.895
AT1G01460	"ATPIPK11; 1-phosphatidylinositol-4-phosphate 5-kinase"	3.39156	3.49403	3.35749	0.0340698	0.372116	0.13654	0.0677937	14.5	8.69	-0.741	0.905
AT1G01470	LEA14 (LATE EMBRYOGENESIS ABUNDANT 14)	5.44335	4.43498	5.37759	0.0657687	0.408423	-0.942603	0.00878158	111	237	1.09	0.852
AT1G01471	unknown protein	3.50485	3.46503	3.52207	-0.0172137	0.441236	-0.0570386	0.241152	0	0	0	0
AT1G01480	ACS2 (1-Amino-cyclopropane-1-carboxylate synthase 2)	4.41726	4.19472	4.6136	-0.196347	0.039437	-0.418885	0.000564714	35	56.1	0.678	0.622
AT1G01490	heavy-metal-associated domain-containing protein	8.44074	5.03427	9.11804	-0.677299	0.000632168	-4.08377	9.65e-08	81.8	82.3	0.00834	1
AT1G01500	NA	6.66385	6.72526	6.30483	0.35901	0.0121394	0.420426	0.00079617	783	721	-0.119	0.872
AT1G01510	AN (ANGUSTIFOLIA)	7.03187	7.03425	6.60149	0.430377	0.00176666	0.432755	0.000568995	5440	5470	0.00987	1
AT1G01520	myb family transcription factor	3.34734	3.25807	3.32864	0.0187026	0.422059	-0.0705706	0.190068	35.3	39.1	0.149	0.924
AT1G01530	"AGL28 (AGAMOUS-LIKE 28); DNA binding / transcription factor"	3.19598	4.74765	3.15338	0.0426008	0.373098	1.59428	1.6e-05	10.5	46	2.14	0.272
AT1G01540	protein kinase family protein	6.37491	6.448	6.23026	0.144653	0.113925	0.21774	0.0110908	3030	2960	-0.0311	1
AT1G01550	BPS1 (BYPASS 1)	9.84761	9.38287	10.0588	-0.211154	0.0331863	-0.675892	0.000268206	11700	12100	0.0549	0.99
AT1G01560	"ATMPK11 (Arabidopsis thaliana MAP kinase 11); MAP kinase/ kinase"	4.36343	3.94375	5.35196	-0.988536	0.000170786	-1.40821	5.76e-06	50.1	56.9	0.182	1
AT1G01570	fringe-related protein	5.67273	5.25013	5.3157	0.357031	0.00310177	-0.0655716	0.204841	161	157	-0.0398	1
AT1G01580	"FRO2 (FERRIC REDUCTION OXIDASE 2); ferric-chelate reductase"	3.7749	3.84122	3.8113	-0.036402	0.341409	0.0299183	0.280772	2.6	2.55	-0.0293	1
AT1G01590	"FRO1 (FERRIC REDUCTION OXIDASE 1); ferric-chelate reductase"	3.76196	3.76488	3.60477	0.157184	0.0657076	0.160113	0.0555758	157	60.6	-1.37	5.41e-06
AT1G01600	"CYP86A4 (cytochrome P450, family 86, subfamily A, polypeptide 4); oxygen binding"	4.2269	6.5133	4.53228	-0.30538	0.00401556	1.98102	3.72e-07	945	641	-0.559	9.73e-05
AT1G01610	"ATGPAT4/GPAT4 (GLYCEROL-3-PHOSPHATE ACYLTRANSFERASE 4); 1-acylglycerol-3-phosphate O-acyltransferase/ acyltransferase"	7.49153	8.82534	7.3047	0.186828	0.0412597	1.52064	1.09e-06	9050	8370	-0.112	0.396
AT1G01620	"PIP1C (PLASMA MEMBRANE INTRINSIC PROTEIN 1;3); water channel"	9.50553	7.42686	8.7096	0.795928	0.00023683	-1.28274	2.23e-06	7110	9360	0.396	5.94e-05
AT1G01630	SEC14 cytosolic factor, putative / phosphoglyceride transfer protein, putative	4.62084	5.48022	4.62217	-0.00133197	0.47055	0.858047	1.6e-05	53.6	38.5	-0.477	0.568
AT1G01640	speckle-type POZ protein-related	6.35993	6.23675	5.79173	0.568204	0.00113063	0.445025	0.00067529	101	97.7	-0.0436	1
AT1G01650	peptidase	8.10633	7.3698	8.59861	-0.49228	0.00252945	-1.22881	4.77e-06	4170	4800	0.201	0.226
AT1G01660	U-box domain-containing protein	3.82327	3.82162	3.74303	0.0802349	0.213367	0.0785854	0.148171	206	216	0.0694	1
AT1G01670	U-box domain-containing protein	4.61041	4.77958	4.48694	0.123462	0.200627	0.292636	0.0073621	304	323	0.0863	0.984
AT1G01680	U-box domain-containing protein	3.27372	3.29011	3.37408	-0.100351	0.234968	-0.0839655	0.174156	13.2	13.1	-0.0031	1
AT1G01690	NA	3.99677	4.03744	3.89595	0.100818	0.150672	0.141486	0.0671217	1220	1200	-0.032	0.992
AT1G01695	NA	3.62842	3.52574	3.50187	0.126545	0.0840445	0.02387	0.298278	75.6	66.2	-0.192	1
AT1G01700	"ATROPGEF2/ROPGEF2 (KINASE PARTNER PROTEIN-LIKE); Rho guanyl-nucleotide exchange factor/ / protein binding"	3.51821	3.49458	3.50552	0.0126961	0.443018	-0.010939	0.337215	64.7	76.9	0.251	1
AT1G01710	acyl-CoA thioesterase family protein	6.06497	6.10553	5.85457	0.210395	0.0310768	0.250952	0.00439182	3830	3900	0.0241	1
AT1G01720	"ATAF1 (Arabidopsis NAC domain containing protein 2); transcription factor"	8.87169	7.52273	8.83728	0.0344078	0.411073	-1.31455	0.000504757	10300	12600	0.3	0.873
AT1G01725	NA	7.33598	7.02537	7.61415	-0.278169	0.0798	-0.588774	0.000477092	486	630	0.374	0.0487
AT1G01730	NA	7.97703	7.62741	7.88334	0.0936832	0.180005	-0.255931	0.00257962	2200	2390	0.117	0.442
AT1G01740	protein kinase family protein	4.72324	4.86858	4.50507	0.218169	0.0184021	0.363508	0.000820965	412	398	-0.0477	1
AT1G01750	actin-depolymerizing factor, putative	3.93829	3.63202	3.64401	0.294284	0.00966455	-0.0119897	0.329125	41.6	60.9	0.548	0.786
AT1G01760	RNA binding / adenosine deaminase	4.37242	4.33257	4.17705	0.195362	0.0755256	0.155519	0.0664223	316	321	0.0244	0.977
AT1G01770	NA	6.70886	5.04971	7.44207	-0.733211	0.00367323	-2.39237	1.39e-06	651	926	0.507	0.00274
AT1G01780	LIM domain-containing protein	7.78738	5.85208	8.59323	-0.805851	0.00013825	-2.74115	2.14e-07	226	351	0.637	0.0064
AT1G01790	"KEA1 (K EFFLUX ANTIPORTER 1); potassium:hydrogen antiporter"	4.60515	4.6386	4.5992	0.00594819	0.454808	0.0394013	0.238031	2370	2940	0.311	0.00822
AT1G01800	short-chain dehydrogenase/reductase (SDR) family protein	7.00768	6.23809	6.79744	0.21024	0.0697731	-0.559347	0.000375333	967	1090	0.173	0.454
AT1G01810	unknown protein	4.15629	4.6375	4.16604	-0.00974893	0.453876	0.471461	0.00165706	89.6	90.7	0.019	1
AT1G01820	PEX11C	8.50445	7.8964	8.2834	0.221048	0.026076	-0.386998	0.000566514	2680	2660	-0.0129	1
AT1G01830	armadillo/beta-catenin repeat family protein	6.07561	5.6295	6.19215	-0.116539	0.153538	-0.562652	0.000247626	3520	3480	-0.0183	1
AT1G01840	NA	5.4292	5.50987	5.11237	0.316829	0.0079171	0.397494	0.000888762	120	125	0.0552	0.977
AT1G01860	PFC1 (PALEFACE 1)	4.8241	4.90913	4.60244	0.221666	0.0689694	0.306691	0.00360767	321	321	-0.000755	0.998
AT1G01880	DNA repair protein, putative	4.51282	4.43793	4.40136	0.111454	0.109389	0.036564	0.253395	636	658	0.0474	0.971
AT1G01900	"ATSBT1.1; subtilase"	4.20117	3.80182	4.74311	-0.54194	0.00160652	-0.941287	6.4e-06	3.48	89.9	4.69	1.21e-08
AT1G01910	anion-transporting ATPase, putative	7.26923	7.837	7.47085	-0.201618	0.0236865	0.366148	0.000479399	3660	3540	-0.0494	0.847
AT1G01920	SET domain-containing protein	5.99921	5.87782	5.37056	0.628644	0.00290261	0.507257	0.00293757	2190	2000	-0.13	0.679
AT1G01930	zinc finger protein-related	5.53722	5.38919	5.5613	-0.0240763	0.407848	-0.172113	0.0670031	1350	1310	-0.043	0.988
AT1G01940	peptidyl-prolyl cis-trans isomerase cyclophilin-type family protein	6.85454	7.24098	6.75734	0.0972007	0.172913	0.48364	0.000222627	1250	1100	-0.184	0.387
AT1G01950	armadillo/beta-catenin repeat family protein / kinesin motor family protein	4.72943	4.74863	4.53873	0.190708	0.0538062	0.209902	0.0163856	2430	2500	0.0464	1
AT1G01960	"EDA10 (embryo sac development arrest 10); guanyl-nucleotide exchange factor"	5.55804	5.4188	5.48994	0.0680933	0.231881	-0.0711408	0.135003	11800	11800	0.00852	1
AT1G01970	pentatricopeptide (PPR) repeat-containing protein	5.83901	5.62839	5.54414	0.294871	0.00636638	0.0842427	0.128589	704	719	0.0303	0.93
AT1G01980	"ATSEC1A; electron carrier"	4.11778	4.34424	4.04778	0.0699989	0.269045	0.296459	0.0331224	27.4	14.7	-0.892	0.973
AT1G01990	NA	7.56012	7.72232	7.28998	0.27014	0.0089885	0.432342	0.000307945	1650	1590	-0.0479	1
AT1G02000	"GAE2 (UDP-D-GLUCURONATE 4-EPIMERASE 2); catalytic"	6.26647	6.49465	7.24266	-0.976196	0.000271107	-0.748012	6.69e-05	1370	1390	0.0248	0.984
AT1G02010	"SEC1A; protein transporter"	3.87099	3.81316	3.75194	0.11905	0.175239	0.0612211	0.181414	483	517	0.0977	0.662
AT1G02020	nitroreductase family protein	6.02542	5.96432	6.1758	-0.150383	0.0802701	-0.21148	0.0366015	899	1020	0.183	0.284
AT1G02030	zinc finger (C2H2 type) family protein	3.40606	3.39574	3.5983	-0.192237	0.0932108	-0.202556	0.051073	0	0.837	0	1
AT1G02040	zinc finger (C2H2 type) family protein	3.6813	3.71491	3.46339	0.217912	0.0260226	0.25152	0.00373985	1.55	3.02	0.969	1
AT1G02050	chalcone and stilbene synthase family protein	6.22799	5.24155	5.39016	0.837833	0.000243435	-0.148605	0.0535433	653	717	0.134	0.722
AT1G02060	pentatricopeptide (PPR) repeat-containing protein	4.34697	4.08002	4.00024	0.346727	0.00807685	0.0797779	0.123925	632	763	0.273	0.474
AT1G02065	"SPL8 (SQUAMOSA PROMOTER BINDING PROTEIN-LIKE 8); DNA binding"	6.76454	6.655	6.05181	0.712728	0.000452149	0.603187	0.000505068	736	703	-0.0669	1
AT1G02070	NA	6.80676	5.26253	6.43882	0.367936	0.0461567	-1.17629	8.05e-05	68	106	0.64	0.26
AT1G02074	unknown protein	5.44409	5.10718	5.28973	0.154356	0.344443	-0.182549	0.223715	0	0.315	0	1
AT1G02080	transcriptional regulator-related	5.07255	4.80852	5.07744	-0.00489044	0.460279	-0.268924	0.00853584	17900	19600	0.129	0.545
AT1G02090	"FUS5 (FUSCA 5); MAP kinase kinase"	7.08296	7.50435	7.19975	-0.116784	0.104295	0.304608	0.00447964	4780	4770	-0.00561	0.99
AT1G02100	leucine carboxyl methyltransferase family protein	7.08761	6.24155	6.92758	0.160024	0.0816926	-0.686033	1.76e-05	1760	1780	0.0226	1
AT1G02110	proline-rich family protein	6.62811	6.21629	6.23361	0.394494	0.00441927	-0.0173205	0.312521	2220	2800	0.336	0.00431
AT1G02120	VAD1 (VASCULAR ASSOCIATED DEATH1)	6.40708	6.21313	6.35991	0.0471724	0.355586	-0.14678	0.08242	3530	4160	0.238	0.0859
AT1G02130	"ATRAB1B (Arabidopsis thaliana responsive to abscisic acid 1B); GTP binding"	7.71341	7.85296	7.95193	-0.238519	0.015075	-0.0989684	0.0851292	3500	3700	0.0781	0.647
AT1G02140	"HAP1/MAGO/MEE63 (MATERNAL EFFECT EMBRYO ARREST 63); protein binding"	9.98864	10.2823	9.77646	0.212186	0.0312688	0.505833	0.00023968	9350	8310	-0.17	0.165
AT1G02145	NA	5.61448	5.80509	5.50102	0.113465	0.133109	0.304066	0.00154549	2290	2270	-0.011	1
AT1G02150	pentatricopeptide (PPR) repeat-containing protein	7.48094	6.89994	6.94046	0.540483	0.00134948	-0.0405134	0.258683	1910	2100	0.134	0.453
AT1G02160	NA	8.57037	8.90168	8.10092	0.469458	0.00382737	0.800762	4.88e-05	1290	1520	0.243	0.161
AT1G02170	"LOL3 (LSD ONE LIKE 3); caspase/ cysteine-type endopeptidase"	7.52097	7.83918	7.85361	-0.332641	0.00350477	-0.0144318	0.315606	1550	1840	0.248	0.372
AT1G02180	ferredoxin-related	6.04726	6.4101	5.72331	0.323947	0.00987702	0.686786	8.8e-05	949	901	-0.0759	0.869
AT1G02190	CER1 protein, putative	6.52906	7.23064	5.52964	0.999425	8.92e-05	1.70101	2.43e-07	25200	29500	0.227	0.0326
AT1G02205	CER1 (ECERIFERUM 1)	4.92629	4.49709	4.78548	0.140804	0.0951429	-0.288396	0.00307929	1160	1900	0.712	2.95e-06
AT1G02210	regulator of shoot apical meristem-related	3.04062	3.02874	3.00909	0.0315279	0.423503	0.0196451	0.324531	0	0	0	0
AT1G02220	"ANAC003 (Arabidopsis NAC domain containing protein 3); transcription factor"	3.6159	3.47156	3.87536	-0.259463	0.0671454	-0.403807	0.0107676	10.4	16.4	0.661	0.953
AT1G02230	"ANAC004 (Arabidopsis NAC domain containing protein 4); transcription factor"	3.10093	3.04592	3.20084	-0.0999115	0.159503	-0.154918	0.0618364	48	30.4	-0.661	0.659
AT1G02250	"ANAC005 (Arabidopsis NAC domain containing protein 5); transcription factor"	3.48002	3.4926	3.32651	0.153518	0.096645	0.166096	0.0473643	2.03	6.15	1.6	0.738
AT1G02260	transmembrane protein, putative	6.9793	6.51476	6.89302	0.0862749	0.246106	-0.378265	0.000923842	2710	3180	0.23	0.0935
AT1G02270	endonuclease/exonuclease/phosphatase family protein / calcium-binding EF hand family protein	5.95015	6.19632	5.9927	-0.0425443	0.338981	0.203621	0.0233178	2130	1880	-0.177	0.24
AT1G02280	"TOC33 (PLASTID PROTEIN IMPORT 1); GTP binding"	7.62106	7.16234	7.12456	0.496503	0.00119477	0.0377876	0.24689	2100	1770	-0.242	0.17
AT1G02290	NA	4.91679	5.08473	4.68408	0.232713	0.0172631	0.400652	0.000659373	1310	1250	-0.0672	1
AT1G02300	cathepsin B-like cysteine protease, putative	8.33766	7.46156	8.64064	-0.302981	0.0238414	-1.17909	5.9e-06	592	733	0.307	0.169
AT1G02305	cathepsin B-like cysteine protease, putative	8.50879	7.89521	8.66727	-0.158487	0.0693643	-0.772067	3.97e-05	7480	8990	0.265	0.0157
AT1G02310	glycosyl hydrolase family protein 5 / cellulase family protein / (1-4)-beta-mannan endohydrolase, putative	3.57188	3.50677	3.81103	-0.239148	0.0202681	-0.304254	0.00311035	4.71	6.09	0.373	1
AT1G02320	unknown protein	3.10374	3.15758	3.00407	0.0996731	0.300271	0.153516	0.178376	0	0	0	0
AT1G02330	NA	7.19689	6.4724	6.85778	0.339102	0.00278551	-0.385385	0.001125	2430	2170	-0.161	0.577
AT1G02335	"GL22 (GERMIN-LIKE PROTEIN SUBFAMILY 2 MEMBER 2 PRECURSOR.); manganese ion binding / metal ion binding / nutrient reservoir"	4.17458	4.08454	4.30312	-0.128535	0.212605	-0.218577	0.0504252	17.2	26.5	0.624	0.694
AT1G02340	"HFR1 (LONG HYPOCOTYL IN FAR-RED); DNA binding / transcription factor"	3.77227	4.11871	4.60063	-0.828369	0.000212778	-0.481922	0.000137766	245	344	0.49	0.0244
AT1G02350	protoporphyrinogen oxidase-related	4.39238	4.93049	4.07451	0.317869	0.00498034	0.855978	0.00118454	74.9	69.4	-0.111	1
AT1G02360	chitinase, putative	3.7656	3.6718	3.67795	0.0876478	0.279609	-0.00615087	0.342348	0.242	0.581	1.26	1
AT1G02370	pentatricopeptide (PPR) repeat-containing protein	5.69217	5.77564	4.97703	0.715138	0.0015382	0.798614	0.00025779	990	746	-0.408	0.00447
AT1G02380	NA	4.83684	4.00093	4.82726	0.0095828	0.459525	-0.826327	0.00033444	150	161	0.105	1
AT1G02390	"ATGPAT2/GPAT2 (GLYCEROL-3-PHOSPHATE ACYLTRANSFERASE 2); acyltransferase"	4.12466	4.00955	4.55361	-0.428946	0.00632191	-0.544064	6.33e-05	2.51	12.3	2.29	0.417
AT1G02391	unknown protein	3.21687	3.50259	3.16398	0.0528858	0.3521	0.338606	0.0185724	0	0	0	0
AT1G02400	"ATGA2OX6/DTA1 (GIBBERELLIN 2-OXIDASE 6); gibberellin 2-beta-dioxygenase"	5.49863	4.43309	7.33281	-1.83418	0.000150192	-2.89972	5.08e-06	175	296	0.76	0.904
AT1G02405	proline-rich family protein	3.76526	5.15373	4.07989	-0.314632	0.072272	1.07384	0.000159008	179	192	0.1	1
AT1G02410	cytochrome c oxidase assembly protein CtaG / Cox11 family	6.89698	6.90272	7.14401	-0.247032	0.0117497	-0.241292	0.0090185	2120	2160	0.0278	1
AT1G02420	pentatricopeptide (PPR) repeat-containing protein	4.05644	4.18971	3.97562	0.0808188	0.23428	0.214087	0.0286489	303	299	-0.0181	0.922
AT1G02430	"ATARFD1B (ADP-ribosylation factor D1B); GTP binding"	3.41612	3.45109	3.2462	0.169922	0.15239	0.204885	0.0646447	48.5	51.5	0.0854	1
AT1G02440	"ATARFD1A (ADP-ribosylation factor D1A); GTP binding"	3.04244	3.25807	2.96411	0.078329	0.346957	0.293957	0.0396971	0.242	1.47	2.6	1
AT1G02450	"NIMIN-1/NIMIN1; protein binding"	3.75031	4.11859	3.80459	-0.0542801	0.387413	0.314006	0.0342	30.9	19.6	-0.655	0.422
AT1G02460	glycoside hydrolase family 28 protein / polygalacturonase (pectinase) family protein	3.74017	5.14555	3.692	0.0481681	0.306279	1.45355	3.46e-07	507	291	-0.802	1.07e-05
AT1G02470	NA	7.53498	4.56939	8.84933	-1.31436	0.000204801	-4.27994	1.45e-07	22.7	25.1	0.14	1
AT1G02475	NA	6.29459	5.85017	6.55281	-0.258222	0.00822391	-0.70264	4.66e-05	690	753	0.127	0.763
AT1G02490	unknown protein	3.28282	3.43949	3.1817	0.101122	0.22955	0.257784	0.0289088	0	0.291	0	1
AT1G02500	"SAM1 (S-adenosylmethionine synthetase 1); methionine adenosyltransferase"	9.57498	10.1123	9.55084	0.0241452	0.387462	0.561444	5.2e-05	25600	27200	0.0885	0.656
AT1G02510	"KCO4 (Ca2+ activated outward rectifying K+ channel 4); outward rectifier potassium channel"	3.58055	3.52948	3.54869	0.031855	0.416461	-0.0192168	0.317801	0.731	0.546	-0.421	1
AT1G02520	"PGP11 (P-GLYCOPROTEIN 11); ATPase, coupled to transmembrane movement of substances"	3.65382	3.72812	3.57665	0.0771675	0.262707	0.151473	0.0611562	3070	2870	-0.0967	0.761
AT1G02530	"PGP12 (P-GLYCOPROTEIN 12); ATPase, coupled to transmembrane movement of substances"	4.15835	4.57201	3.97137	0.186983	0.109609	0.600641	0.000328596	19500	18000	-0.116	0.551
AT1G02540	unknown protein	3.13837	3.03212	3.17367	-0.035303	0.35	-0.14155	0.0425802	6.96	4.46	-0.642	0.851
AT1G02550	invertase/pectin methylesterase inhibitor family protein	4.29747	4.58179	4.33613	-0.0386679	0.412077	0.245651	0.0500174	17.4	6.89	-1.33	0.499
AT1G02560	"CLPP5 (NUCLEAR ENCODED CLP PROTEASE 1); endopeptidase Clp"	7.17417	7.23923	7.50178	-0.327611	0.00699541	-0.262554	0.00970346	4940	4920	-0.00402	1
AT1G02570	NA	3.9036	3.63986	3.9478	-0.0442023	0.403507	-0.307944	0.0221804	11.1	2.57	-2.11	0.503
AT1G02580	"MEA (MEDEA); transcription factor"	5.06388	4.27334	5.61933	-0.555456	0.00208053	-1.34599	5.53e-06	333	49.8	-2.74	7.46e-30
AT1G02590	aldehyde oxidase, putative	2.88713	2.83185	2.90353	-0.0163935	0.454927	-0.0716735	0.262621	0	0	0	0
AT1G02610	zinc finger (C3HC4-type RING finger) family protein	5.4286	4.3293	5.33916	0.0894449	0.205656	-1.00985	6.32e-06	201	174	-0.211	0.639
AT1G02620	GTP-binding protein (SAR1A)	4.02129	3.74466	4.01675	0.00453625	0.467398	-0.272089	0.0498275	0.485	1.08	1.16	1
AT1G02630	equilibrative nucleoside transporter, putative (ENT8)	3.49363	3.65781	3.48583	0.00780514	0.452639	0.171982	0.0277787	1.22	1.84	0.594	1
AT1G02640	"BXL2 (BETA-XYLOSIDASE 2); hydrolase, hydrolyzing O-glycosyl compounds"	7.06207	5.4061	6.68812	0.373944	0.00313102	-1.28202	1.64e-06	664	569	-0.223	0.227
AT1G02650	DNAJ heat shock N-terminal domain-containing protein	3.9516	3.85182	3.78018	0.171415	0.123762	0.0716395	0.182509	47.9	22	-1.12	0.35
AT1G02660	lipase class 3 family protein	7.12881	5.48438	7.75737	-0.628554	0.00448868	-2.27299	3.56e-05	2590	3980	0.623	0.138
AT1G02670	DNA repair protein, putative	3.98227	4.10847	4.35716	-0.374895	0.00519932	-0.248692	0.0185234	527	487	-0.113	1
AT1G02680	"TAF13 (TBP-ASSOCIATED FACTOR 13); RNA polymerase II transcription factor"	6.47726	6.26864	6.47424	0.00301404	0.4668	-0.205603	0.010812	1440	1390	-0.0531	1
AT1G02690	importin alpha-2 subunit, putative	5.88212	6.16824	5.41677	0.465351	0.000674849	0.751472	1.33e-05	4460	3540	-0.335	0.00131
AT1G02700	NA	3.84032	4.09896	3.9446	-0.104282	0.159584	0.15436	0.110416	3.24	13.3	2.04	0.43
AT1G02710	glycine-rich protein	5.15581	4.99913	5.16924	-0.0134315	0.438337	-0.170104	0.0758596	20.5	25.2	0.294	0.827
AT1G02720	"GATL5; polygalacturonate 4-alpha-galacturonosyltransferase/ transferase, transferring glycosyl groups / transferase, transferring hexosyl groups"	5.16054	7.11488	5.16242	-0.00188485	0.470381	1.95245	3.3e-07	4170	3910	-0.0928	0.642
AT1G02730	"ATCSLD5 (CELLULOSE SYNTHASE-LIKE D5); 1,4-beta-D-xylan synthase/ cellulose synthase"	4.6543	5.03122	4.33897	0.315331	0.0128631	0.692255	0.000102249	6770	7380	0.125	0.643
AT1G02740	chromatin binding	6.36181	6.01803	6.24147	0.120341	0.151845	-0.223442	0.0187596	1030	1010	-0.0354	1
AT1G02750	zinc ion binding	7.34519	7.21086	7.2511	0.0940883	0.192843	-0.0402382	0.247032	671	670	-0.00166	1
AT1G02770	NA	7.28147	7.56432	7.13125	0.150226	0.0632219	0.433077	0.000186698	603	683	0.178	0.518
AT1G02780	"EMB2386 (EMBRYO DEFECTIVE 2386); structural constituent of ribosome"	9.62425	9.92455	9.23041	0.393841	0.0016848	0.694145	2.3e-05	66600	53700	-0.312	0.000597
AT1G02790	"PGA4 (POLYGALACTURONASE 4); polygalacturonase"	3.81464	5.55589	3.85488	-0.0402408	0.405611	1.70101	0.00358482	147	104	-0.495	0.919
AT1G02800	"ATCEL2 (Arabidopsis thaliana Cellulase 2); hydrolase, hydrolyzing O-glycosyl compounds"	6.82674	7.05493	5.94694	0.879804	0.000278754	1.10799	5.29e-06	2530	3040	0.264	0.314
AT1G02810	pectinesterase family protein	4.0949	4.07345	3.94187	0.153028	0.149532	0.131582	0.112892	44.1	32.4	-0.445	0.638
AT1G02813	NA	3.74464	4.2429	3.68815	0.056486	0.359853	0.554748	0.00067928	2.77	0.546	-2.34	0.915
AT1G02816	NA	7.73957	7.56057	8.32376	-0.584194	0.000371757	-0.763195	1.12e-05	1550	1460	-0.0855	0.755
AT1G02820	late embryogenesis abundant 3 family protein / LEA3 family protein	5.05401	4.06135	5.35873	-0.304714	0.00765807	-1.29738	0.000100012	6.34	15.6	1.3	0.552
AT1G02830	60S ribosomal protein L22 (RPL22A)	3.97508	4.09774	4.08782	-0.112737	0.168039	0.00992218	0.344871	0.651	0.315	-1.05	1
AT1G02840	"SR1 (splicing factor 2); RNA binding"	8.60744	7.55349	8.11941	0.488025	0.00144475	-0.565921	0.000175335	7000	7590	0.117	0.547
AT1G02850	glycosyl hydrolase family 1 protein	6.38752	4.23477	7.17291	-0.785394	0.000176831	-2.93814	7.36e-08	132	148	0.174	0.913
AT1G02860	"NLA (NITROGEN LIMITATION ADAPTATION); protein binding / zinc ion binding"	6.14056	5.17151	6.94699	-0.80643	0.000336648	-1.77547	3.21e-06	209	244	0.225	0.997
AT1G02870	NA	7.29387	7.7515	6.54732	0.746549	0.000833793	1.20418	7.6e-06	1320	897	-0.562	0.00606
AT1G02880	"TPK1 (THIAMIN PYROPHOSPHOKINASE1); thiamin diphosphokinase"	5.44673	4.93869	6.07229	-0.625562	0.00185865	-1.13361	6.15e-05	463	524	0.177	0.435
AT1G02890	AAA-type ATPase family protein	4.85854	4.68874	4.91748	-0.0589382	0.314225	-0.228744	0.0170711	6480	6730	0.0528	0.935
AT1G02900	RALFL1 (RALF-LIKE 1)	3.82789	3.75842	3.8743	-0.0464058	0.383532	-0.115876	0.17836	2.59	1.79	-0.532	0.97
AT1G02910	"LPA1 (LOW PSII ACCUMULATION1); binding"	5.91214	5.6775	5.81369	0.0984528	0.170492	-0.136191	0.0333554	1080	1200	0.158	0.436
AT1G02920	"ATGSTF7 (GLUTATHIONE S-TRANSFERASE 11); glutathione transferase"	4.04861	4.31143	3.80762	0.240986	0.175056	0.503813	0.020961	119	109	-0.121	0.976
AT1G02930	"ATGSTF6 (EARLY RESPONSIVE TO DEHYDRATION 11); glutathione transferase"	3.24064	8.28411	3.49086	-0.250222	0.0851682	4.79325	1.05e-07	29500	25900	-0.189	0.594
AT1G02940	"ATGSTF5 (Arabidopsis thaliana Glutathione S-transferase (class phi) 5); glutathione transferase"	3.4287	6.89466	3.41016	0.0185361	0.419335	3.4845	3.01e-08	1160	1230	0.0761	0.982
AT1G02950	"ATGSTF4 (GLUTATHIONE S-TRANSFERASE 31); glutathione transferase"	6.08143	5.58471	6.38066	-0.299227	0.00479811	-0.795951	3.98e-05	395	356	-0.149	0.926
AT1G02952	other RNA	4.59334	4.28301	4.74327	-0.149925	0.188969	-0.46026	0.0374653	0.242	2.11	3.12	0.937
AT1G02960	NA	5.83242	5.42587	5.53419	0.29823	0.0124536	-0.108316	0.0923177	1610	1790	0.149	0.24
AT1G02965	NA	3.67365	3.74184	3.87294	-0.199282	0.0655722	-0.131095	0.0851253	0	0.57	0	1
AT1G02970	"WEE1 (ARABIDOPSIS WEE1 KINASE HOMOLOG); kinase/ protein kinase"	3.98935	4.6578	3.81394	0.17541	0.068964	0.843863	2.56e-05	820	683	-0.264	0.112
AT1G02980	"CUL2 (cullin 2); ubiquitin protein ligase binding"	3.49781	4.2552	3.59141	-0.0936072	0.233831	0.663782	3.5e-05	227	78.5	-1.53	5.02e-09
AT1G02990	NA	4.11603	4.03229	4.25313	-0.137102	0.103585	-0.220841	0.0153893	2910	2890	-0.0111	1
AT1G03000	"PEX6 (PEROXIN6); ATPase"	5.32707	5.26908	5.15524	0.171828	0.0437139	0.113841	0.0747565	2080	2220	0.095	0.761
AT1G03010	phototropic-responsive NPH3 family protein	3.66458	4.40985	3.45694	0.207641	0.0840445	0.952914	8.95e-06	769	674	-0.189	0.846
AT1G03020	glutaredoxin family protein	3.57297	3.47039	3.47738	0.095592	0.273792	-0.00699214	0.346259	0	0	0	0
AT1G03022	unknown protein	2.95989	2.9036	3.43665	-0.476758	0.0822034	-0.533052	0.0356461	0	0	0	0
AT1G03030	phosphoribulokinase/uridine kinase family protein	5.37874	5.62564	5.371	0.00773953	0.45576	0.25464	0.0113345	1310	1350	0.0368	0.915
AT1G03040	basic helix-loop-helix (bHLH) family protein	8.1739	8.33581	7.79387	0.380027	0.00160673	0.541943	9.67e-05	8840	9170	0.0527	0.865
AT1G03050	epsin N-terminal homology (ENTH) domain-containing protein / clathrin assembly protein-related	3.38614	3.59722	3.40111	-0.0149634	0.431437	0.196109	0.0233451	12.3	10.8	-0.187	0.946
AT1G03055	NA	3.63339	4.061	3.70906	-0.0756738	0.272014	0.351939	0.00388044	45.6	14.6	-1.65	0.0182
AT1G03060	WD-40 repeat family protein / beige-related	4.45342	4.32383	4.39199	0.061427	0.242073	-0.0681646	0.139245	7820	9160	0.228	0.482
AT1G03070	glutamate binding /	4.94493	5.79436	5.31899	-0.374059	0.0197282	0.475367	0.00244134	181	267	0.559	0.0334
AT1G03080	kinase interacting family protein	4.59009	4.01257	4.86607	-0.275986	0.0172631	-0.853502	2.71e-05	6720	7320	0.122	0.513
AT1G03090	MCCA (3-methylcrotonyl-CoA carboxylase 1)	5.7441	5.15935	5.59192	0.152179	0.0758929	-0.432569	0.000581999	1740	2250	0.374	0.0124
AT1G03100	pentatricopeptide (PPR) repeat-containing protein	4.33509	4.27905	4.03186	0.303224	0.0101981	0.247193	0.0175885	242	237	-0.0308	1
AT1G03103	protease inhibitor/seed storage/lipid transfer protein (LTP) family protein	4.20032	3.90965	4.29064	-0.0903235	0.367851	-0.380991	0.0536965	0	0.256	0	1
AT1G03106	unknown protein	3.92557	3.70019	3.89429	0.0312869	0.411349	-0.194091	0.0852508	4.55	2.14	-1.09	1
AT1G03110	transducin family protein / WD-40 repeat family protein	5.68111	6.59712	5.26355	0.417563	0.00148141	1.33357	1.03e-06	1720	1420	-0.275	0.0207
AT1G03120	ATRAB28 (Arabidopsis thaliana responsive to abscisic acid 28)	4.17829	4.537	4.27341	-0.0951178	0.362492	0.263591	0.100301	54.5	43.2	-0.338	0.99
AT1G03130	PSAD-2 (photosystem I subunit D-2)	8.61623	6.56986	8.91054	-0.294309	0.00455549	-2.34068	1.36e-07	695	800	0.203	0.572
AT1G03140	splicing factor Prp18 family protein	7.74043	7.10572	7.56111	0.179318	0.037166	-0.455395	0.00299219	3000	3310	0.144	0.339
AT1G03150	GCN5-related N-acetyltransferase (GNAT) family protein	6.70468	7.15497	6.86811	-0.16343	0.0396912	0.286859	0.00351006	919	845	-0.12	0.673
AT1G03160	"FZL (FZO-LIKE); GTP binding / GTPase/ thiamin-phosphate diphosphorylase"	4.36515	4.32025	4.32602	0.0391317	0.359949	-0.00576763	0.34303	933	954	0.0317	1
AT1G03170	NA	6.77929	8.95688	5.5787	1.20059	0.00269545	3.37819	3.09e-06	5840	4340	-0.428	6.44e-05
AT1G03180	NA	4.12818	4.76711	3.876	0.25218	0.0808136	0.891114	7.22e-05	478	397	-0.269	0.855
AT1G03190	"ATXPD/UVH6 (ULTRAVIOLET HYPERSENSITIVE 6); ATP binding / ATP-dependent DNA helicase/ ATP-dependent helicase/ DNA binding / hydrolase, acting on acid anhydrides, in phosphorus-containing anhydrides / nucleic acid binding"	5.15446	5.11486	5.08152	0.0729461	0.257384	0.033345	0.258972	1600	1530	-0.068	0.895
AT1G03210	phenazine biosynthesis PhzC/PhzF family protein	7.42771	6.8165	7.07454	0.353169	0.0221679	-0.258038	0.00874964	639	659	0.045	0.942
AT1G03220	extracellular dermal glycoprotein, putative / EDGP, putative	7.5475	5.05284	8.40222	-0.854712	0.00104575	-3.34938	7.31e-08	74.9	86	0.199	1
AT1G03230	extracellular dermal glycoprotein, putative / EDGP, putative	4.52819	4.32087	4.66228	-0.134087	0.252997	-0.341411	0.00905559	145	170	0.236	0.943
AT1G03250	NA	6.49766	6.75386	6.6946	-0.196939	0.0384997	0.0592583	0.177193	1510	1640	0.117	0.78
AT1G03260	NA	5.75585	6.00452	5.88782	-0.131966	0.111157	0.116699	0.0773948	687	737	0.102	1
AT1G03270	NA	4.97507	4.96337	4.49582	0.479254	0.00393776	0.467552	0.0033542	539	573	0.0875	1
AT1G03280	transcription initiation factor IIE (TFIIE) alpha subunit family protein / general transcription factor TFIIE family protein	6.19366	5.95662	6.36294	-0.169286	0.0606237	-0.406321	0.00148734	2750	2950	0.0989	0.633
AT1G03290	NA	6.11927	6.07745	6.3636	-0.24432	0.0170196	-0.286149	0.0195453	5930	6320	0.0915	0.627
AT1G03300	agenet domain-containing protein	5.15513	5.03361	4.79318	0.361945	0.0083723	0.240423	0.0243051	1340	1140	-0.232	0.256
AT1G03310	"ATISA2/BE2/DBE1/ISA2 (DEBRANCHING ENZYME 1); alpha-amylase/ isoamylase"	5.53591	6.39196	5.28189	0.254026	0.0324829	1.11007	1.07e-05	3680	3200	-0.2	0.175
AT1G03320	unknown protein	3.98227	4.0008	3.95864	0.0236306	0.420714	0.0421605	0.292464	4.78	13.1	1.45	0.642
AT1G03330	small nuclear ribonucleoprotein D, putative / snRNP core SM-like protein, putative / U6 snRNA-associated Sm-like protein, putative	7.86443	7.94666	7.65932	0.205114	0.0353292	0.287341	0.00370546	2680	2560	-0.0667	0.911
AT1G03340	NA	3.45603	3.5348	3.43662	0.0194082	0.442605	0.0981842	0.17194	21.9	19.6	-0.159	1
AT1G03350	BSD domain-containing protein	7.25248	7.02356	8.01624	-0.763758	0.000560683	-0.992684	1.1e-05	4590	4210	-0.125	0.476
AT1G03360	"ATRRP4; exonuclease"	6.11805	6.54313	5.41187	0.706176	0.000694981	1.13125	1.08e-05	1590	941	-0.754	5.28e-10
AT1G03370	C2 domain-containing protein / GRAM domain-containing protein	4.48813	4.57446	4.42677	0.0613654	0.26692	0.147691	0.0386843	2210	2430	0.137	0.812
AT1G03380	AtATG18g (Arabidopsis thaliana homolog of yeast autophagy 18 (ATG18) g)	5.28274	4.55922	5.27371	0.00902625	0.456085	-0.714496	7.63e-05	1510	1880	0.31	0.0165
AT1G03390	transferase family protein	3.37662	3.44837	3.38903	-0.0124117	0.433979	0.0593456	0.164066	2.61	6.79	1.38	0.891
AT1G03400	2-oxoglutarate-dependent dioxygenase, putative	4.81581	4.33397	4.88958	-0.0737755	0.265503	-0.555611	0.000172894	41	72.3	0.819	0.149
AT1G03410	2A6	3.66862	3.65602	3.7053	-0.0366776	0.352887	-0.0492715	0.212372	242	278	0.202	0.836
AT1G03420	transposable element gene	4.85242	5.92006	4.62678	0.22564	0.150164	1.29328	0.000152162	14.5	14.7	0.0187	1
AT1G03430	"AHP5 (HISTIDINE-CONTAINING PHOSPHOTRANSFER FACTOR 5); histidine phosphotransfer kinase"	7.05545	6.31558	7.07198	-0.0165306	0.426538	-0.756395	5.78e-05	548	558	0.0253	1
AT1G03440	leucine-rich repeat family protein	5.7278	5.46317	5.51358	0.21422	0.0392369	-0.0504146	0.270731	315	395	0.325	0.164
AT1G03445	"BSU1 (BRI1 SUPPRESSOR 1); protein serine/threonine phosphatase"	3.55368	3.98299	3.67718	-0.123494	0.0883338	0.305812	0.0040163	83.2	43.1	-0.95	0.0354
AT1G03457	RNA-binding protein, putative	5.25159	4.99887	4.37862	0.872962	0.00161048	0.620248	0.0010122	645	367	-0.814	1.85e-06
AT1G03470	kinase interacting family protein	5.22194	4.53221	5.10571	0.116231	0.208863	-0.573506	0.000470256	427	426	-0.00403	0.988
AT1G03475	"LIN2 (LESION INITIATION 2); coproporphyrinogen oxidase"	6.79235	7.09108	6.57535	0.217	0.0194451	0.515737	7.47e-05	2710	2610	-0.0571	1
AT1G03490	"ANAC006 (Arabidopsis NAC domain containing protein 6); transcription factor"	3.67006	3.77964	3.57254	0.0975215	0.289269	0.207097	0.080882	0	0.511	0	1
AT1G03495	transferase	3.00384	2.86887	2.82459	0.179251	0.128227	0.0442811	0.292644	264	214	-0.306	0.509
AT1G03510	pentatricopeptide (PPR) repeat-containing protein	4.65121	4.7396	4.32851	0.3227	0.00605891	0.411088	0.00162239	142	104	-0.454	0.409
AT1G03520	glycosyltransferase family 14 protein / core-2/I-branching enzyme family protein	6.32134	6.05026	6.50062	-0.179279	0.0633023	-0.450352	0.000868406	956	1070	0.16	0.432
AT1G03530	ATNAF1/NAF1	5.34194	5.78234	4.99029	0.351656	0.00536288	0.792048	1.74e-05	1950	1510	-0.363	0.03
AT1G03540	pentatricopeptide (PPR) repeat-containing protein	4.03694	4.03404	4.07987	-0.0429254	0.382006	-0.045831	0.258035	219	234	0.0925	0.93
AT1G03550	secretory carrier membrane protein (SCAMP) family protein	5.35684	5.1631	6.22245	-0.865611	0.000224787	-1.05935	8.29e-06	518	580	0.164	0.664
AT1G03560	pentatricopeptide (PPR) repeat-containing protein	4.88065	4.98066	4.69172	0.188931	0.0708617	0.288939	0.00583808	843	800	-0.0748	0.857
AT1G03590	protein phosphatase 2C family protein / PP2C family protein	7.38565	6.78427	7.034	0.351648	0.0024911	-0.249734	0.00546291	6700	7060	0.0755	0.778
AT1G03600	photosystem II family protein	9.01743	7.24153	8.70719	0.310243	0.0169402	-1.46566	1.2e-06	903	1580	0.804	4.47e-12
AT1G03610	NA	6.82878	5.3748	7.60592	-0.777135	0.00026831	-2.23112	4.8e-07	584	710	0.283	0.521
AT1G03620	phagocytosis and cell motility protein ELMO1-related	4.54008	4.0331	4.81328	-0.273198	0.0213894	-0.780184	5.99e-05	27.8	23.7	-0.229	0.971
AT1G03630	"POR C (PROTOCHLOROPHYLLIDE OXIDOREDUCTASE); NADPH dehydrogenase/ oxidoreductase/ protochlorophyllide reductase"	5.72526	5.59969	5.21726	0.508005	0.00183385	0.38243	0.00128769	1010	1400	0.477	0.000209
AT1G03650	GCN5-related N-acetyltransferase (GNAT) family protein	5.01873	4.75951	4.39985	0.618882	0.0010926	0.359661	0.00104399	148	147	-0.0151	1
AT1G03660	NA	5.42485	5.20122	5.35584	0.0690097	0.376192	-0.154622	0.180199	37.8	34.4	-0.14	1
AT1G03670	ankyrin repeat family protein	3.18466	3.13244	3.18937	-0.00470647	0.462827	-0.0569314	0.201123	1.79	0.256	-2.81	0.882
AT1G03680	"ATHM1 (Arabidopsis thioredoxin M-type 1); thiol-disulfide exchange intermediate"	8.68872	8.75983	8.60932	0.079399	0.183312	0.150505	0.0253059	2380	2800	0.235	0.131
AT1G03687	NA	5.75579	6.09069	5.25714	0.498648	0.00500403	0.833544	2.52e-05	913	884	-0.0465	0.956
AT1G03700	integral membrane family protein	3.95478	3.81331	3.99922	-0.0444423	0.353108	-0.185912	0.0733024	16.2	19.4	0.262	1
AT1G03710	cysteine protease inhibitor	8.64651	8.35435	8.84221	-0.195698	0.0203312	-0.487864	0.000129331	2920	3160	0.113	0.593
AT1G03720	cathepsin-related	5.32794	4.16616	4.68477	0.643168	0.0132162	-0.518613	0.000344938	125	93.9	-0.409	0.659
AT1G03730	NA	6.43159	7.58703	5.94106	0.490525	0.00164172	1.64596	5.82e-07	1440	1470	0.0326	0.94
AT1G03740	protein kinase family protein	4.92692	4.93015	4.97957	-0.052643	0.282883	-0.0494198	0.214163	2030	2030	0.00289	1
AT1G03743	snoRNA	2.99455	2.96521	3.02522	-0.0306729	0.447835	-0.0600083	0.313405	0	0	0	0
AT1G03746	snoRNA	3.99613	6.44426	4.24403	-0.2479	0.194665	2.20023	7.49e-06	0	0	0	0
AT1G03750	"CHR9/SNF2/SWI2 (chromatin remodeling 9); helicase"	4.96156	4.72377	4.85588	0.105683	0.22383	-0.132108	0.108108	978	994	0.0234	0.979
AT1G03760	prefoldin subunit family protein	5.99021	5.6055	5.32927	0.660946	0.000406822	0.276231	0.0053297	1110	944	-0.234	0.19
AT1G03770	protein binding / zinc ion binding	4.94645	5.13052	4.59057	0.355877	0.0101952	0.539947	0.000137766	1280	1110	-0.207	0.459
AT1G03780	targeting protein-related	4.00502	4.2201	3.83561	0.169415	0.0684535	0.38449	0.00313655	3730	3480	-0.1	0.686
AT1G03790	zinc finger (CCCH-type) family protein	4.43744	4.21673	4.49362	-0.056185	0.318568	-0.276888	0.0334215	0.651	0.546	-0.254	1
AT1G03800	"ATERF10/ERF10 (ERF domain protein 10); DNA binding / transcription factor/ transcription repressor"	4.08268	5.06579	4.20358	-0.120899	0.268612	0.862212	0.000168756	102	35.2	-1.53	0.000426
AT1G03810	DNA-binding protein-related	3.58707	3.68989	3.57962	0.0074452	0.459729	0.110266	0.180838	0	0	0	0
AT1G03820	NA	3.60569	3.49986	3.56275	0.0429375	0.339918	-0.0628963	0.202608	12.2	8.03	-0.601	0.871
AT1G03830	guanylate-binding family protein	4.57379	4.62987	4.2985	0.275291	0.0117497	0.331375	0.0025506	2470	2370	-0.0617	0.754
AT1G03840	"MGP (MAGPIE); nucleic acid binding / protein binding / transcription factor/ zinc ion binding"	3.86033	3.89979	4.97422	-1.11389	0.000233441	-1.07443	3.21e-05	37.8	48.3	0.353	0.806
AT1G03850	glutaredoxin family protein	3.80436	4.70973	4.37216	-0.567802	0.00152224	0.337571	0.0423548	62.2	54.4	-0.193	1
AT1G03860	ATPHB2 (PROHIBITIN 2)	7.52744	8.06507	6.84883	0.678602	0.0010883	1.21623	4.41e-06	5290	4090	-0.371	0.000494
AT1G03870	FLA9	6.48688	7.9639	6.23475	0.252128	0.0905997	1.72915	1.82e-06	1510	1070	-0.494	0.133
AT1G03880	"CRU2 (CRUCIFERIN 2); nutrient reservoir"	3.53538	3.66777	3.61046	-0.0750753	0.271412	0.0573165	0.204354	0	0	0	0
AT1G03890	cupin family protein	3.80834	3.87657	3.81672	-0.00837274	0.458434	0.0598591	0.220872	0.651	0	0	1
AT1G03900	ATNAP4 (ARABIDOPSIS THALIANA NON-INTRINSIC ABC PROTEIN 4)	8.29116	7.81961	8.61888	-0.327714	0.00249483	-0.799272	4.72e-06	3610	3730	0.0474	0.812
AT1G03905	ABC transporter family protein	4.82334	5.4848	4.35481	0.46853	0.00105004	1.12999	4.95e-06	573	599	0.0652	0.818
AT1G03910	NA	6.25522	5.98902	5.98835	0.266872	0.0119893	0.000671475	0.354188	4540	4580	0.0132	1
AT1G03920	protein kinase, putative	3.44143	3.72807	3.42304	0.018392	0.4307	0.305031	0.00355641	21.3	22.8	0.101	1
AT1G03930	"ADK1 (DUAL SPECIFICITY KINASE 1); kinase"	4.6389	4.75575	4.80525	-0.166358	0.053458	-0.0495007	0.217203	1310	1360	0.0519	0.908
AT1G03950	VPS2.3	5.5906	5.40741	5.93113	-0.340535	0.0145039	-0.523717	0.000252796	856	854	-0.0031	1
AT1G03960	calcium-binding EF hand family protein	5.0813	5.05273	4.88785	0.193447	0.0432299	0.164878	0.0304339	1760	1630	-0.109	0.686
AT1G03970	"GBF4 (G-box binding factor 4); transcription factor"	8.02838	7.57009	7.95262	0.0757629	0.196602	-0.382528	0.00399084	1040	1270	0.282	0.208
AT1G03980	"ATPCS2 (PHYTOCHELATIN SYNTHASE 2); glutathione gamma-glutamylcysteinyltransferase"	3.9936	4.44526	3.98834	0.00525804	0.460994	0.456921	0.000493166	170	114	-0.572	0.0513
AT1G03982	NA	3.11549	3.11641	3.07592	0.0395647	0.379379	0.0404839	0.256454	9.33	5.15	-0.857	0.984
AT1G03990	alcohol oxidase-related	3.95309	3.94839	4.03472	-0.0816279	0.204307	-0.086336	0.134578	515	550	0.0951	0.934
AT1G04000	NA	8.46334	10.2541	8.74995	-0.286614	0.0141521	1.50412	5.72e-07	5720	5370	-0.0903	0.743
AT1G04010	phosphatidylcholine-sterol O-acyltransferase	4.7286	5.53554	4.3922	0.336399	0.0165336	1.14333	1.3e-06	2090	1830	-0.19	0.248
AT1G04020	"ATBARD1/BARD1 (BREAST CANCER ASSOCIATED RING 1); transcription coactivator"	4.01542	5.09963	3.76413	0.251292	0.0279105	1.33549	2.75e-05	2930	2550	-0.2	0.176
AT1G04030	NA	5.94713	5.52827	5.8603	0.0868301	0.212044	-0.332026	0.000850871	2900	2880	-0.00697	1
AT1G04040	acid phosphatase class B family protein	6.851	3.84122	6.44601	0.404989	0.0240328	-2.60479	4.26e-07	138	162	0.228	0.891
AT1G04050	"SUVR1 (Arabidopsis homolog of SU(VAR)3-9 1); histone-lysine N-methyltransferase/ zinc ion binding"	5.24719	4.84975	4.94797	0.299221	0.00947741	-0.0982196	0.126504	1140	1230	0.11	0.898
AT1G04070	TOM22-I (translocase of the outer mitochondrial membrane 22-I)	7.31669	8.17713	7.59387	-0.277184	0.00966455	0.583261	8.76e-05	879	817	-0.105	0.828
AT1G04080	"PRP39; binding"	7.6672	7.63005	7.52454	0.142657	0.0884448	0.105506	0.0675243	10500	10700	0.0284	1
AT1G04090	NA	4.01161	4.24292	4.32608	-0.314467	0.0179144	-0.0831566	0.173005	193	173	-0.155	0.987
AT1G04100	"IAA10 (indoleacetic acid-induced protein 10); transcription factor"	5.21011	5.52217	5.46776	-0.257652	0.0221898	0.0544097	0.217436	314	358	0.193	0.735
AT1G04110	"SDD1 (STOMATAL DENSITY AND DISTRIBUTION); subtilase"	3.66968	3.74172	3.60441	0.0652748	0.313669	0.137315	0.0407595	40.9	44.8	0.131	0.997
AT1G04120	ATMRP5 (Arabidopsis thaliana multidrug resistance-associated protein 5)	5.99304	5.33113	6.33093	-0.337891	0.00942573	-0.999805	2.88e-05	15500	15600	0.0142	1
AT1G04130	tetratricopeptide repeat (TPR)-containing protein	6.00756	6.46605	5.81789	0.189665	0.042261	0.648156	0.000320114	1170	1100	-0.0859	0.854
AT1G04140	transducin family protein / WD-40 repeat family protein	6.41514	6.18499	6.38646	0.0286717	0.403293	-0.20147	0.0210634	10500	10300	-0.0283	1
AT1G04150	C2 domain-containing protein	4.29497	4.34376	3.94068	0.354288	0.0026047	0.403079	0.000480673	153	120	-0.349	0.997
AT1G04160	XIB (Myosin-like protein XIB)	3.7711	4.15864	3.89944	-0.128338	0.0912503	0.259198	0.0122777	1720	1750	0.023	1
AT1G04170	"EIF2 GAMMA (eukaryotic translation initiation factor 2 gamma subunit); translation factor, nucleic acid binding"	7.48209	8.2891	7.14829	0.333798	0.00342034	1.14081	4.25e-06	10700	7890	-0.44	0.00121
AT1G04171	unknown protein	3.40755	3.84022	3.41877	-0.0112253	0.457725	0.42145	0.037653	0	0	0	0
AT1G04180	flavin-containing monooxygenase family protein / FMO family protein	3.78072	3.90486	4.01897	-0.238252	0.0450363	-0.114115	0.180341	0.894	0.57	-0.648	1
AT1G04190	tetratricopeptide repeat (TPR)-containing protein	6.58499	6.97722	6.23455	0.350442	0.00507229	0.742676	2.48e-05	2580	2040	-0.333	0.00221
AT1G04200	NA	5.37212	6.00966	5.2456	0.126519	0.0992815	0.764061	1.8e-05	6500	5910	-0.136	0.312
AT1G04210	leucine-rich repeat family protein / protein kinase family protein	5.26122	5.3298	5.36389	-0.102663	0.124081	-0.0340867	0.24893	6770	6070	-0.159	0.234
AT1G04220	beta-ketoacyl-CoA synthase, putative	4.91069	5.9921	5.10928	-0.198586	0.135955	0.88282	3.04e-05	3690	3480	-0.0849	0.903
AT1G04230	NA	6.45791	6.56382	6.18669	0.271219	0.0118192	0.377123	0.00133687	1540	1530	-0.0135	1
AT1G04240	"SHY2 (SHORT HYPOCOTYL 2); transcription factor"	3.80482	3.98878	3.64244	0.162378	0.135252	0.346338	0.00220396	126	127	0.00673	1
AT1G04250	"AXR3 (AUXIN RESISTANT 3); transcription factor"	4.7589	5.02741	4.86807	-0.109173	0.262791	0.159341	0.113414	506	470	-0.106	1
AT1G04260	MPI7 (CAMV MOVEMENT PROTEIN INTERACTING PROTEIN 7)	7.94912	8.42301	8.08644	-0.13732	0.0623268	0.33657	0.00128342	1830	1710	-0.101	0.971
AT1G04270	"RPS15 (CYTOSOLIC RIBOSOMAL PROTEIN S15); structural constituent of ribosome"	10.1807	10.7312	9.67362	0.507107	0.0030163	1.05754	1.59e-05	38100	28800	-0.401	4.55e-06
AT1G04280	NA	5.47557	4.22025	5.32028	0.155287	0.0597713	-1.10003	8.43e-06	123	246	0.994	4.88e-05
AT1G04290	thioesterase family protein	6.62502	7.12623	6.77709	-0.152067	0.0755256	0.349137	0.000981552	507	479	-0.0839	0.982
AT1G04295	other RNA	5.35874	4.93817	5.14022	0.218521	0.0723019	-0.202044	0.101951	8.68	10.1	0.222	1
AT1G04300	NA	5.96279	5.44861	5.91337	0.0494205	0.335515	-0.464751	0.000788656	5680	6080	0.097	0.725
AT1G04310	"ERS2 (ETHYLENE RESPONSE SENSOR 2); receptor"	7.34335	6.25215	7.82145	-0.478098	0.00132699	-1.56931	3.99e-07	2290	2450	0.0932	0.644
AT1G04330	NA	4.69538	4.04714	5.29386	-0.598473	0.000335421	-1.24672	1.12e-06	6.64	3.37	-0.977	0.881
AT1G04340	lesion inducing protein-related	7.79351	8.23474	7.92506	-0.131555	0.0825511	0.309672	0.00181446	3570	3020	-0.244	0.0621
AT1G04350	2-oxoglutarate-dependent dioxygenase, putative	6.66204	5.49079	7.46191	-0.799876	0.000303757	-1.97112	5.28e-07	239	342	0.515	0.0661
AT1G04360	zinc finger (C3HC4-type RING finger) family protein	4.52704	4.05578	4.35519	0.171856	0.116889	-0.299407	0.016523	95.4	90	-0.0836	1
AT1G04370	"ATERF14 (ETHYLENE-RESPONSIVE ELEMENT BINDING FACTOR 14); DNA binding / transcription factor"	3.67743	3.65527	3.7869	-0.109471	0.32049	-0.131635	0.207231	0	0	0	0
AT1G04380	2-oxoglutarate-dependent dioxygenase, putative	3.56396	3.47035	3.4527	0.111259	0.133303	0.0176504	0.328004	1.94	337	7.44	7.33e-31
AT1G04390	binding / protein binding	5.152	4.88366	5.07715	0.0748529	0.240117	-0.193489	0.0226597	844	849	0.00828	1
AT1G04400	CRY2 (CRYPTOCHROME 2)	8.12736	6.03539	8.58714	-0.459778	0.00275214	-2.55175	8.32e-08	3560	4810	0.435	4.5e-05
AT1G04410	malate dehydrogenase, cytosolic, putative	9.32498	9.73449	9.51658	-0.191601	0.0192926	0.217911	0.0127349	40300	38900	-0.0521	0.734
AT1G04420	aldo/keto reductase family protein	5.86429	5.63978	6.05807	-0.19378	0.0221293	-0.41829	0.000417755	844	940	0.154	0.732
AT1G04425	other RNA	3.89233	3.87437	3.7049	0.187425	0.134216	0.169472	0.0966418	0.485	10.6	4.46	0.0919
AT1G04430	dehydration-responsive protein-related	4.80453	5.98156	4.89948	-0.0949524	0.184493	1.08208	1.28e-05	5630	4890	-0.204	0.0765
AT1G04440	"CKL13 (CASEIN KINASE LIKE 13); casein kinase I/ kinase"	7.17057	5.81205	7.4698	-0.299227	0.00652247	-1.65774	3.68e-07	1970	2440	0.304	0.0912
AT1G04445	zinc finger (C2H2 type) family protein	4.54235	5.4617	4.90688	-0.36453	0.00379855	0.554814	0.00646675	57.8	105	0.865	0.318
AT1G04450	RIC3 (ROP-INTERACTIVE CRIB MOTIF-CONTAINING PROTEIN 3)	3.33327	3.39777	3.34472	-0.0114532	0.44952	0.0530432	0.247163	4.63	1.99	-1.22	1
AT1G04470	NA	3.64246	3.79034	3.64979	-0.00732938	0.457467	0.140548	0.0635747	9.39	13.7	0.55	1
AT1G04480	60S ribosomal protein L23 (RPL23A)	9.72821	10.3402	9.26927	0.45894	0.00274345	1.07091	3.56e-06	10500	8230	-0.357	8.95e-05
AT1G04490	NA	3.53572	3.37553	3.77351	-0.237794	0.0274553	-0.397979	0.00250656	5.76	6.21	0.108	1
AT1G04500	zinc finger CONSTANS-related	3.7683	3.69732	3.83112	-0.0628145	0.262892	-0.133801	0.0560351	2.03	1.85	-0.135	1
AT1G04501	unknown protein	3.20513	3.58013	3.38231	-0.177185	0.201313	0.197818	0.121525	0	0	0	0
AT1G04510	transducin family protein / WD-40 repeat family protein	6.54781	6.77244	6.32162	0.226184	0.0203875	0.450817	0.000396725	5970	5420	-0.139	0.241
AT1G04520	33 kDa secretory protein-related	4.55826	5.2648	3.79808	0.760186	0.000156119	1.46672	1.38e-06	1690	1350	-0.33	0.119
AT1G04530	binding	6.99963	6.19928	6.8614	0.138228	0.0677165	-0.662125	3.21e-05	1610	2010	0.322	0.00713
AT1G04540	C2 domain-containing protein	3.60812	3.86169	3.61939	-0.0112725	0.449775	0.242299	0.0841493	137	115	-0.263	1
AT1G04550	"IAA12 (AUXIN-INDUCED PROTEIN 12); transcription factor"	7.18436	7.24401	6.74895	0.435411	0.00458229	0.495062	0.000593325	1680	1520	-0.14	0.765
AT1G04555	NA	5.08891	4.85263	5.4054	-0.316493	0.0318926	-0.552771	0.00313112	677	690	0.0291	1
AT1G04560	AWPM-19-like membrane family protein	4.14353	4.40062	4.14244	0.00109504	0.472612	0.258181	0.026255	40.9	32.3	-0.342	0.972
AT1G04570	integral membrane transporter family protein	4.68871	6.09387	4.63313	0.0555729	0.308043	1.46074	2.61e-07	1160	815	-0.514	0.0505
AT1G04580	"AAO4 (ALDEHYDE OXIDASE 4); aldehyde oxidase"	5.09107	4.62876	6.27494	-1.18387	0.000532434	-1.64618	4.65e-06	1790	1800	0.0126	1
AT1G04590	NA	6.42767	6.93794	5.97196	0.455717	0.00373078	0.965984	4.86e-06	1960	1880	-0.0609	0.725
AT1G04600	"XIA (Myosin-like protein XIA); motor/ protein binding"	3.35295	3.5042	3.41623	-0.0632808	0.242441	0.0879677	0.109025	337	360	0.0944	0.887
AT1G04610	flavin-containing monooxygenase / FMO (YUCCA3)	3.80945	3.89573	3.83326	-0.0238097	0.432848	0.0624629	0.251504	34.1	22.9	-0.577	0.906
AT1G04620	coenzyme F420 hydrogenase family / dehydrogenase, beta subunit family	5.80617	5.43354	5.59129	0.214888	0.0357533	-0.157751	0.0751762	831	916	0.139	0.984
AT1G04625	NA	3.75916	3.81974	3.7554	0.00376438	0.466738	0.064346	0.201021	0.651	2.57	1.98	0.935
AT1G04630	MEE4 (maternal effect embryo arrest 4)	7.663	8.16039	7.48388	0.179117	0.030754	0.676508	3.26e-05	2030	2040	0.00654	1
AT1G04635	"EMB1687 (EMBRYO DEFECTIVE 1687); ribonuclease P"	4.17234	5.00448	4.12919	0.0431447	0.376765	0.875287	3.37e-05	146	113	-0.365	0.429
AT1G04640	LIP2 (LIPOYLTRANSFERASE 2)	5.66487	5.38226	5.20393	0.460942	0.00520198	0.178333	0.0683799	205	213	0.0541	0.94
AT1G04645	self-incompatibility protein-related	10.4186	9.43855	10.2535	0.165128	0.101766	-0.814961	4.68e-05	1730	246	-2.82	8.26e-110
AT1G04650	NA	3.98666	4.00182	3.91492	0.0717343	0.284937	0.0869009	0.173254	827	708	-0.224	0.325
AT1G04660	glycine-rich protein	4.5364	4.71872	4.4484	0.0880024	0.252096	0.270321	0.00654861	0.326	0	0	1
AT1G04670	NA	3.72021	3.65216	3.70385	0.0163584	0.444522	-0.0516926	0.25444	0	0	0	0
AT1G04680	pectate lyase family protein	4.48698	5.70766	4.44191	0.0450681	0.332905	1.26575	2e-06	1130	1330	0.237	0.189
AT1G04684	unknown protein	4.00306	4.36024	3.78509	0.217964	0.313534	0.575144	0.0392185	0	0	0	0
AT1G04690	"KAB1 (POTASSIUM CHANNEL BETA SUBUNIT); potassium channel"	8.49422	9.03506	8.79516	-0.300932	0.0065812	0.239905	0.0129433	13100	13000	-0.00484	1
AT1G04700	protein kinase family protein	3.66626	3.86943	3.64286	0.0234016	0.410206	0.226575	0.0133659	564	546	-0.0484	0.898
AT1G04710	acetyl-CoA C-acyltransferase, putative / 3-ketoacyl-CoA thiolase, putative	5.57444	6.366	5.59128	-0.0168424	0.432916	0.774719	2.17e-05	1750	1690	-0.053	0.815
AT1G04730	AAA-type ATPase family protein	3.99603	4.33299	3.8381	0.157926	0.0926601	0.494892	0.000356022	1540	1320	-0.222	0.113
AT1G04750	VAMP7B (VESICLE-ASSOCIATED MEMBRANE PROTEIN 7B)	9.65285	9.7167	9.57668	0.0761754	0.18603	0.140021	0.0438739	9110	8960	-0.0241	1
AT1G04760	ATVAMP726 (VESICLE-ASSOCIATED MEMBRANE PROTEIN)	4.70035	4.8869	4.37298	0.327371	0.0406603	0.513922	0.00150609	389	406	0.0633	1
AT1G04770	male sterility MS5 family protein	7.57922	8.0007	8.04544	-0.466216	0.00136598	-0.0447404	0.24352	2290	2130	-0.106	0.919
AT1G04778	unknown protein	4.04184	4.15021	4.43319	-0.391347	0.00414233	-0.282978	0.116429	1.78	2.84	0.672	1
AT1G04780	ankyrin repeat family protein	6.78865	6.16548	7.33253	-0.543882	0.0122087	-1.16705	4.56e-05	6710	6740	0.0065	1
AT1G04790	zinc finger (C3HC4-type RING finger) family protein	5.54822	5.29161	5.44695	0.101275	0.139793	-0.155334	0.0395026	2140	2320	0.116	0.724
AT1G04800	glycine-rich protein	4.73242	4.7366	4.78232	-0.0498964	0.407871	-0.045719	0.283792	1.46	5.3	1.86	0.8
AT1G04810	26S proteasome regulatory subunit, putative	5.89953	6.18229	5.9028	-0.00327527	0.464815	0.279484	0.00890361	6530	6590	0.0118	1
AT1G04820	TUA4 (tubulin alpha-4 chain)	9.499	10.8389	9.14342	0.35558	0.00563742	1.69545	6.06e-07	92600	83300	-0.152	0.363
AT1G04830	RabGAP/TBC domain-containing protein	6.21325	6.02913	6.17125	0.041995	0.347936	-0.142119	0.0579321	1130	1150	0.0279	1
AT1G04840	pentatricopeptide (PPR) repeat-containing protein	3.69998	3.74576	3.65741	0.0425642	0.376765	0.0883469	0.179581	147	124	-0.239	0.769
AT1G04850	ubiquitin-associated (UBA)/TS-N domain-containing protein	7.13862	7.37952	7.29199	-0.153361	0.104059	0.0875362	0.174297	10500	10200	-0.0465	0.935
AT1G04860	"UBP2 (UBIQUITIN-SPECIFIC PROTEASE 2); ubiquitin-specific protease"	5.06773	5.11812	5.15554	-0.0878071	0.172635	-0.0374223	0.231303	3030	2440	-0.313	0.0702
AT1G04870	protein arginine N-methyltransferase family protein	7.13865	7.51891	6.68849	0.450166	0.00221011	0.830422	1.29e-05	2610	1920	-0.443	4.64e-05
AT1G04880	high mobility group (HMG1/2) family protein / ARID/BRIGHT DNA-binding domain-containing protein	3.81496	4.42375	3.84079	-0.0258315	0.390387	0.582956	7.51e-05	179	64.5	-1.47	9.74e-06
AT1G04890	NA	3.19858	3.11618	3.06772	0.130864	0.110656	0.0484599	0.219627	0	0.291	0	1
AT1G04900	NA	5.28571	5.90705	4.77392	0.511787	0.0014317	1.13313	1.63e-06	1640	1250	-0.394	0.0017
AT1G04910	NA	6.27021	6.37062	6.23853	0.0316857	0.360823	0.132089	0.0414963	2880	3010	0.066	0.783
AT1G04920	"ATSPS3F (sucrose phosphate synthase 3F); sucrose-phosphate synthase/ transferase, transferring glycosyl groups"	3.53269	3.48296	3.52689	0.00580233	0.45658	-0.0439243	0.238877	5.18	29.3	2.5	0.0129
AT1G04930	hydroxyproline-rich glycoprotein family protein	5.38561	5.31331	5.51593	-0.130321	0.0850889	-0.202619	0.0160827	414	327	-0.341	0.181
AT1G04940	"TIC20; P-P-bond-hydrolysis-driven protein transmembrane transporter"	7.47593	7.60387	7.05204	0.423891	0.00199477	0.551838	0.000140163	197	192	-0.0329	1
AT1G04945	NA	6.26082	6.51697	5.88936	0.371451	0.00304679	0.627605	6.55e-05	686	524	-0.389	0.011
AT1G04945	NA	5.88985	6.21516	5.50586	0.383986	0.0014461	0.709296	5.33e-05	686	524	-0.389	0.011
AT1G04945	NA	5.83876	6.14583	5.45327	0.385484	0.00181039	0.692551	7.33e-05	686	524	-0.389	0.011
AT1G04950	"TAFII59 (TBP-ASSOCIATED FACTOR 6); transcription initiation factor"	6.25288	5.81401	5.8329	0.419983	0.00392366	-0.0188848	0.312337	2610	2840	0.124	0.74
AT1G04960	NA	6.98514	6.39383	7.6618	-0.67666	0.000841971	-1.26797	3.07e-06	1430	1350	-0.0781	0.988
AT1G04970	lipid-binding serum glycoprotein family protein	7.79362	6.52429	8.47942	-0.685792	0.000278754	-1.95512	1.51e-07	1380	1670	0.271	0.0426
AT1G04980	"ATPDIL2-2 (PDI-LIKE 2-2); thiol-disulfide exchange intermediate"	5.36776	6.66771	5.55258	-0.184825	0.0277386	1.11513	1.13e-05	3680	3150	-0.223	0.268
AT1G04985	NA	7.15939	6.7539	7.15948	-8.83e-05	0.47405	-0.405585	0.000627509	993	980	-0.0183	1
AT1G04990	zinc finger (CCCH-type) family protein	6.77965	7.51117	6.99119	-0.211542	0.030209	0.519976	7.47e-05	5220	5650	0.114	0.67
AT1G05000	tyrosine specific protein phosphatase family protein	7.26399	5.4936	8.46211	-1.19812	0.000124505	-2.96851	8.24e-08	120	103	-0.225	0.898
AT1G05010	EFE (ETHYLENE FORMING ENZYME)	7.55161	5.64983	8.62622	-1.07462	0.000198756	-2.97639	6.28e-08	50.3	55.2	0.132	0.985
AT1G05020	epsin N-terminal homology (ENTH) domain-containing protein / clathrin assembly protein-related	3.74725	3.79637	3.80932	-0.0620636	0.244468	-0.0129506	0.321901	10.5	9.38	-0.168	0.955
AT1G05030	hexose transporter, putative	5.2943	5.17377	5.05138	0.242927	0.0445003	0.122392	0.153098	745	814	0.127	0.776
AT1G05040	NA	3.3153	3.23531	3.27246	0.0428382	0.367566	-0.0371516	0.258683	0	2.4	0	0.748
AT1G05055	"ATGTF2H2/GTF2H2 (GENERAL TRANSCRIPTION FACTOR IIH 2); general RNA polymerase II transcription factor"	6.52388	6.98797	6.44035	0.0835302	0.210195	0.547622	0.000115679	1410	1230	-0.203	0.263
AT1G05060	NA	6.34141	6.14939	6.25472	0.0866884	0.211457	-0.105329	0.0732184	982	1070	0.118	0.478
AT1G05065	"CLE20 (CLAVATA3/ESR-RELATED 20); receptor binding"	4.09313	3.9941	4.028	0.0651316	0.416995	-0.0339046	0.306148	5.2	6.96	0.421	1
AT1G05070	NA	7.21782	6.81288	6.9639	0.253916	0.0119677	-0.151023	0.042864	2120	2190	0.0479	0.987
AT1G05080	F-box family protein	3.553	3.56564	3.68162	-0.128612	0.1585	-0.115977	0.10218	10.2	7.31	-0.484	0.977
AT1G05085	unknown protein	2.86066	3.08162	2.92061	-0.0599485	0.367852	0.161015	0.157747	0	0	0	0
AT1G05100	"MAPKKK18 (Mitogen-activated protein kinase kinase kinase 18); kinase"	5.79801	4.79599	7.30238	-1.50437	0.000722774	-2.50639	1.51e-06	433	755	0.801	0.0273
AT1G05120	SNF2 domain-containing protein / helicase domain-containing protein / RING finger domain-containing protein	5.35276	5.24177	5.4937	-0.140942	0.0806175	-0.25193	0.00630651	3700	3870	0.0664	0.952
AT1G05136	unknown protein	2.72488	2.55937	2.96388	-0.239	0.162747	-0.40451	0.0180758	0.242	0	0	1
AT1G05140	membrane-associated zinc metalloprotease, putative	7.37595	6.63864	7.43674	-0.0607896	0.259335	-0.798094	8.79e-06	938	1160	0.309	0.013
AT1G05150	calcium-binding EF hand family protein	5.8002	5.97094	5.76802	0.0321805	0.373772	0.202915	0.0164648	6030	6060	0.00755	1
AT1G05160	"CYP88A3 (ENT-KAURENOIC ACID HYDROXYLASE 1); oxygen binding"	4.85918	5.06256	4.54299	0.316188	0.013996	0.519568	0.000406537	1030	1100	0.0997	0.717
AT1G05170	galactosyltransferase family protein	4.91715	4.85818	5.50029	-0.583134	0.000799861	-0.642107	8.23e-05	447	424	-0.0765	0.969
AT1G05180	"AXR1 (AUXIN RESISTANT 1); small protein activating enzyme"	5.93512	6.09649	5.65057	0.284548	0.00707511	0.44592	0.0003229	3000	2670	-0.169	0.32
AT1G05190	"EMB2394 (EMBRYO DEFECTIVE 2394); structural constituent of ribosome"	7.3443	7.12202	6.86624	0.478055	0.0033044	0.255772	0.0149873	1520	1720	0.179	0.205
AT1G05200	ATGLR3.4 (Arabidopsis thaliana glutamate receptor 3.4)	5.72251	5.55538	5.34235	0.380157	0.0047413	0.213029	0.0105504	6000	6050	0.0129	1
AT1G05205	NA	6.84898	7.63436	6.5115	0.337482	0.0143067	1.12286	1.61e-05	1100	986	-0.152	0.755
AT1G05210	NA	6.60788	7.84385	6.29044	0.317438	0.00781677	1.55341	2.53e-07	870	789	-0.141	0.613
AT1G05220	NA	4.18067	4.27971	4.13726	0.0434174	0.357107	0.142448	0.0866619	8.77	17.9	1.03	0.661
AT1G05230	homeobox-leucine zipper family protein / lipid-binding START domain-containing protein	5.57438	6.41483	5.49953	0.0748512	0.238547	0.915306	1.04e-05	5600	5500	-0.0248	0.989
AT1G05260	"RCI3 (RARE COLD INDUCIBLE GENE 3); peroxidase"	4.50255	9.09119	3.86565	0.636905	0.000467396	5.22554	2.65e-08	4930	5330	0.112	0.799
AT1G05270	TraB family protein	5.84764	6.50803	6.18031	-0.332675	0.0103914	0.327716	0.00282004	1160	1130	-0.04	0.94
AT1G05280	fringe-related protein	4.59576	5.46309	5.57443	-0.978669	0.000421356	-0.111336	0.147505	342	355	0.055	0.99
AT1G05290	transcription factor	3.17789	3.1676	3.29212	-0.114225	0.143649	-0.124514	0.106534	0	0.256	0	1
AT1G05291	NA	3.34937	4.88447	3.65126	-0.301888	0.0794135	1.23321	0.000126911	10.1	0.546	-4.22	0.169
AT1G05300	"ZIP5 (ZINC TRANSPORTER 5 PRECURSOR); cation transmembrane transporter"	4.11457	3.93478	4.09004	0.0245341	0.407586	-0.155254	0.0452627	9.25	22.4	1.28	0.546
AT1G05310	pectinesterase family protein	3.57177	3.57305	3.51791	0.0538626	0.31513	0.055138	0.214429	0.326	0.861	1.4	1
AT1G05320	NA	4.37308	4.4911	4.78161	-0.408528	0.00374045	-0.290515	0.0109701	3470	3120	-0.153	0.438
AT1G05330	unknown protein	6.62229	4.11543	8.33431	-1.71202	0.000226064	-4.21888	8.35e-08	3.73	6.77	0.861	1
AT1G05340	NA	10.011	7.66774	10.7855	-0.774452	0.000662572	-3.11775	6.51e-07	142	197	0.47	0.922
AT1G05350	thiF family protein	5.66749	6.13051	5.73206	-0.0645649	0.273023	0.398449	0.00117811	2960	2750	-0.106	0.465
AT1G05360	NA	5.51772	5.74043	5.35697	0.16075	0.0765976	0.383465	0.00231284	2510	2520	0.00864	1
AT1G05370	NA	4.09393	4.13024	4.13681	-0.0428756	0.349708	-0.00657147	0.34432	33.3	43.2	0.375	0.806
AT1G05380	DNA binding	5.62234	5.50848	5.67695	-0.0546121	0.332441	-0.168474	0.052314	4770	4710	-0.0194	1
AT1G05385	photosystem II 11 kDa protein-related	5.90918	5.6013	5.60087	0.308309	0.0193681	0.000435559	0.35511	271	268	-0.0147	0.982
AT1G05400	NA	4.91355	4.34729	4.46305	0.450496	0.00281179	-0.115762	0.0737274	38.2	22.4	-0.77	0.749
AT1G05410	NA	6.48287	6.20142	5.80573	0.677145	0.000235771	0.395698	0.000450097	1660	1500	-0.149	0.605
AT1G05420	ATOFP12/OFP12 (Arabidopsis thaliana ovate family protein 12)	5.34868	6.01317	5.36946	-0.0207757	0.446288	0.643714	0.00520588	98.8	123	0.317	0.634
AT1G05430	NA	7.18988	7.44202	7.30799	-0.118112	0.113785	0.134034	0.0446114	2280	2160	-0.0757	0.971
AT1G05440	NA	4.16077	4.64477	3.9466	0.214172	0.0240966	0.69817	7.98e-05	812	886	0.126	0.828
AT1G05450	protease inhibitor/seed storage/lipid transfer protein (LTP)-related	4.3136	4.6066	4.33568	-0.0220838	0.427812	0.270918	0.00730599	0.727	3.2	2.14	0.914
AT1G05460	SDE3 (SILENCING DEFECTIVE)	5.03026	4.98559	4.73244	0.297817	0.022189	0.253152	0.0149919	3430	3560	0.0555	0.937
AT1G05470	endonuclease/exonuclease/phosphatase family protein	4.30623	4.41193	4.03827	0.267963	0.00615612	0.373661	0.00051192	600	571	-0.0701	1
AT1G05490	"CHR31 (chromatin remodeling 31); ATP binding / DNA binding / helicase/ nucleic acid binding"	7.09298	6.67565	7.342	-0.24902	0.12468	-0.666349	0.0021034	32600	30400	-0.1	0.497
AT1G05500	ATSYTE/NTMC2T2.1/NTMC2TYPE2.1/SYTE	6.33111	6.5244	6.37871	-0.0476047	0.29949	0.145686	0.0357584	6430	6200	-0.0522	0.779
AT1G05510	NA	3.77011	3.89879	3.96786	-0.197755	0.0670442	-0.0690718	0.202688	4.78	4.74	-0.0106	1
AT1G05520	transport protein, putative	5.78167	6.21412	6.0682	-0.286534	0.00913117	0.145914	0.0655179	5030	4900	-0.0381	0.857
AT1G05530	"UGT2/UGT75B2 (UDP-glucosyl transferase 75B2); UDP-glucosyltransferase/ UDP-glycosyltransferase/ abscisic acid glucosyltransferase/ transferase, transferring glycosyl groups"	3.7753	3.85924	3.83583	-0.0605382	0.331379	0.0234105	0.311601	0	1.16	0	0.984
AT1G05540	NA	8.27531	8.83532	7.44708	0.828226	0.000261723	1.38824	9.04e-07	3920	3860	-0.0228	1
AT1G05550	NA	5.16202	5.30179	4.72295	0.439062	0.0049841	0.578835	0.00521773	867	1000	0.209	0.469
AT1G05560	"UGT1 (UDP-glucosyl transferase 75B1); UDP-glycosyltransferase/ transferase, transferring glycosyl groups"	6.08176	4.15967	7.52282	-1.44107	0.000300584	-3.36316	3.83e-07	44.6	52.8	0.242	0.931
AT1G05570	"CALS1 (CALLOSE SYNTHASE 1); transferase, transferring glycosyl groups"	5.29475	5.0961	5.0743	0.220444	0.0126058	0.0217945	0.285179	14700	15700	0.0964	0.655
AT1G05575	unknown protein	6.33947	3.90663	6.28906	0.0504075	0.409526	-2.38243	2.83e-05	4.69	4.16	-0.171	0.988
AT1G05577	NA	3.1772	3.31958	3.23432	-0.0571175	0.293228	0.0852624	0.116582	0.326	0.605	0.894	1
AT1G05580	"ATCHX23 (CATION/H+ EXCHANGER 23); monovalent cation:proton antiporter"	3.93114	4.20651	3.97193	-0.04079	0.34553	0.234586	0.0245117	64.3	56.3	-0.19	1
AT1G05590	"ATHEX3/HEXO2 (BETA-HEXOSAMINIDASE 2); beta-N-acetylhexosaminidase/ hexosaminidase/ hydrolase, hydrolyzing O-glycosyl compounds"	5.37757	5.66656	5.23271	0.144867	0.0834954	0.433854	0.000560242	2530	2350	-0.103	0.755
AT1G05600	pentatricopeptide (PPR) repeat-containing protein	5.75803	5.35337	5.46492	0.293111	0.0225799	-0.111551	0.116968	485	477	-0.0238	1
AT1G05610	"APS2 (ADP-GLUCOSE PYROPHOSHORYLASE SMALL SUBUNIT 2); glucose-1-phosphate adenylyltransferase"	3.67264	3.53803	4.11557	-0.442938	0.00521118	-0.577541	0.000533681	23.4	27.6	0.239	1
AT1G05615	NA	3.08075	3.16591	3.15132	-0.0705732	0.346843	0.0145861	0.334978	0	0	0	0
AT1G05620	inosine-uridine preferring nucleoside hydrolase family protein	7.35622	6.63713	8.44759	-1.09136	0.000352133	-1.81045	1.34e-06	1780	1760	-0.0169	1
AT1G05630	"5PTASE13/AT5PTASE13; inositol or phosphatidylinositol phosphatase"	4.13313	4.07651	4.03323	0.0999051	0.153287	0.0432767	0.235102	1330	1410	0.0862	0.641
AT1G05640	ankyrin repeat family protein	4.45384	4.80572	4.32473	0.129118	0.108585	0.480989	0.000426516	844	830	-0.0252	1
AT1G05650	polygalacturonase, putative / pectinase, putative	3.96899	4.25739	4.11797	-0.148989	0.195479	0.139419	0.177848	0	0	0	0
AT1G05660	polygalacturonase, putative / pectinase, putative	3.89351	3.97676	3.96208	-0.0685761	0.321041	0.0146808	0.342559	0	0	0	0
AT1G05670	UDP-glucoronosyl/UDP-glucosyl transferase family protein	4.04152	4.07626	3.86464	0.176876	0.0504346	0.211624	0.0173883	850	799	-0.0891	0.904
AT1G05680	UDP-glucoronosyl/UDP-glucosyl transferase family protein	4.54394	3.94081	6.09073	-1.54679	0.00015395	-2.14992	3.46e-07	9.24	19.5	1.08	0.772
AT1G05690	"BT3 (BTB and TAZ domain protein 3); protein binding / transcription regulator"	4.76968	4.54815	4.88401	-0.114339	0.102134	-0.335862	0.0043698	186	231	0.309	0.564
AT1G05700	leucine-rich repeat protein kinase, putative	3.40152	3.29053	3.29815	0.103372	0.177506	-0.00762459	0.33855	0.727	1.64	1.17	1
AT1G05710	ethylene-responsive protein, putative	7.65829	7.26968	7.41557	0.242723	0.154382	-0.14589	0.153289	2070	1600	-0.374	0.00629
AT1G05720	selenoprotein family protein	8.76864	9.34433	8.18743	0.581216	0.00066756	1.15691	3.77e-06	2670	2680	0.00468	0.987
AT1G05730	NA	4.46048	5.02676	4.08701	0.373472	0.0394861	0.939746	2.86e-05	468	277	-0.755	0.000129
AT1G05740	NA	3.63509	3.81386	3.55928	0.0758121	0.21667	0.254579	0.00921751	5.85	4.04	-0.534	1
AT1G05750	PDE247 (PIGMENT DEFECTIVE 247)	4.48252	4.4957	4.32214	0.160387	0.0993404	0.173565	0.0441648	332	346	0.0587	1
AT1G05760	RTM1 (RESTRICTED TEV MOVEMENT 1)	7.68616	6.7832	8.30224	-0.61608	0.000393588	-1.51904	4.29e-07	0	0	0	0
AT1G05770	jacalin lectin family protein	6.9643	5.85492	7.40788	-0.443575	0.00322392	-1.55296	9.72e-07	93.1	106	0.188	0.769
AT1G05780	NA	5.50618	5.42711	5.52841	-0.0222273	0.418116	-0.101294	0.12304	525	566	0.108	0.807
AT1G05785	Got1-like family protein	6.17324	6.25827	6.12716	0.0460777	0.358902	0.131108	0.104544	631	622	-0.0203	1
AT1G05790	lipase class 3 family protein	5.8925	5.19912	5.90132	-0.00881999	0.446353	-0.702202	3.11e-05	1350	1560	0.21	0.171
AT1G05800	lipase class 3 family protein	3.49383	3.72185	3.52931	-0.0354763	0.359853	0.192542	0.0717612	0	0	0	0
AT1G05805	basic helix-loop-helix (bHLH) family protein	6.23572	5.61752	6.00994	0.225773	0.0449766	-0.392426	0.0042086	971	1040	0.101	0.59
AT1G05810	"ARA/Ara-1/AtRABA5e/AtRab11D (Arabidopsis Rab GTPase homolog A5e); GTP binding"	5.01841	5.04667	4.85605	0.16236	0.129125	0.190617	0.0315887	62.1	67.3	0.116	0.955
AT1G05820	peptidase	3.99591	4.16638	4.09657	-0.100662	0.186409	0.0698128	0.166831	188	168	-0.16	0.935
AT1G05830	trithorax protein, putative / PHD finger family protein / SET domain-containing protein	4.77271	4.58257	4.67285	0.099866	0.173943	-0.0902727	0.100719	3310	3670	0.151	0.374
AT1G05835	NA	6.07521	5.6496	5.39031	0.684896	0.00063184	0.259294	0.0514494	506	593	0.229	0.333
AT1G05840	aspartyl protease family protein	7.56149	6.52338	7.33607	0.225415	0.0139615	-0.812697	6.37e-06	2710	3090	0.188	0.214
AT1G05850	"POM1 (POM-POM1); chitinase"	8.79299	9.42602	9.2675	-0.474509	0.00204122	0.158524	0.0525965	29800	28300	-0.0747	0.731
AT1G05860	NA	5.66334	5.66431	5.41733	0.246006	0.0353582	0.246974	0.00860373	886	925	0.0621	1
AT1G05870	NA	6.76386	7.45977	6.88016	-0.116301	0.132134	0.579604	0.000761724	1960	2040	0.0636	0.831
AT1G05880	zinc ion binding	3.16559	3.34497	3.23638	-0.0707935	0.208766	0.108583	0.109808	0	0	0	0
AT1G05890	zinc finger protein-related	6.97657	5.37758	6.73013	0.246442	0.0216483	-1.35255	7.7e-07	1770	2010	0.178	0.227
AT1G05894	NA	3.23948	3.13672	3.27356	-0.034078	0.397383	-0.136838	0.136339	35.5	33.1	-0.102	1
AT1G05900	endonuclease-related	4.69906	4.51423	4.86027	-0.161208	0.0710086	-0.346047	0.00111646	393	496	0.335	0.397
AT1G05910	cell division cycle protein 48-related / CDC48-related	5.02024	5.34317	5.11179	-0.0915442	0.167383	0.231384	0.0074481	5950	5380	-0.145	0.25
AT1G05920	DNA binding	3.68238	3.60658	3.64494	0.037445	0.35533	-0.0383587	0.263554	6.09	3.21	-0.925	1
AT1G05925	unknown protein	2.81415	2.74662	2.79294	0.0212079	0.448262	-0.0463241	0.283577	0	0	0	0
AT1G05930	DNA binding	3.74846	3.69435	3.844	-0.0955374	0.180953	-0.149646	0.0512937	0.242	0	0	1
AT1G05940	"CAT9 (CATIONIC AMINO ACID TRANSPORTER 9); cationic amino acid transmembrane transporter"	7.07936	7.27211	6.96808	0.111285	0.113853	0.304029	0.00129737	2520	2990	0.244	0.0632
AT1G05950	NA	5.89806	5.79542	5.65113	0.246932	0.0408927	0.14429	0.0489154	3080	2680	-0.202	0.257
AT1G05960	binding	5.00013	4.94615	5.05408	-0.0539439	0.266687	-0.107927	0.0849424	3170	3180	0.00449	1
AT1G05970	nucleotide binding	7.53943	6.99772	6.983	0.556431	0.00121353	0.0147199	0.324595	588	807	0.456	0.0922
AT1G05990	calcium-binding protein, putative	3.91609	3.86155	3.95435	-0.0382644	0.382701	-0.0928031	0.20893	1.22	0	0	0.894
AT1G06000	UDP-glucoronosyl/UDP-glucosyl transferase family protein	3.9269	3.97451	3.98204	-0.0551355	0.333416	-0.00752651	0.335331	9.74	9.73	-0.000926	0.995
AT1G06010	unknown protein	6.8702	7.04402	6.11758	0.752619	0.00547503	0.926443	0.000388246	1220	1230	0.0115	1
AT1G06020	pfkB-type carbohydrate kinase family protein	5.36146	5.17358	5.62164	-0.260189	0.0189645	-0.44806	0.0020791	683	55.6	-3.62	1.14e-82
AT1G06030	pfkB-type carbohydrate kinase family protein	5.45184	5.57785	5.57508	-0.123245	0.167383	0.00276555	0.3518	92.4	19.3	-2.26	7.65e-07
AT1G06040	"STO (SALT TOLERANCE); transcription factor/ zinc ion binding"	9.71207	8.68016	10.0182	-0.306163	0.00582829	-1.33807	1.74e-06	4270	4140	-0.0443	0.934
AT1G06050	NA	6.40064	5.49426	7.54205	-1.14141	0.000310401	-2.04779	6.53e-07	424	372	-0.188	0.581
AT1G06060	RanBPM-related	6.82766	6.74921	6.74661	0.0810572	0.195053	0.00260723	0.348622	1020	1050	0.0356	0.901
AT1G06070	bZIP transcription factor, putative (bZIP69)	6.72667	6.56676	6.79586	-0.0691939	0.249645	-0.229106	0.0109466	3260	3130	-0.0558	0.829
AT1G06080	"ADS1 (DELTA 9 DESATURASE 1); oxidoreductase"	5.14803	4.92004	4.40042	0.747611	0.0011976	0.519619	0.00234946	323	237	-0.448	0.122
AT1G06090	fatty acid desaturase family protein	4.03	4.05279	4.08342	-0.0534167	0.362377	-0.0306303	0.305137	0	0	0	0
AT1G06100	fatty acid desaturase family protein	3.75486	4.17425	3.77122	-0.0163614	0.424964	0.403032	0.000317364	7.23	13.1	0.861	0.74
AT1G06110	"SKIP16 (SKP1/ASK-INTERACTING PROTEIN 16); protein binding"	8.04165	7.55857	7.68029	0.361357	0.00718423	-0.121722	0.0585123	2630	3060	0.22	0.117
AT1G06120	fatty acid desaturase family protein	3.44729	3.19086	3.24805	0.199243	0.0905861	-0.0571921	0.272267	0.242	0	0	1
AT1G06130	"GLX2-4 (GLYOXALASE 2-4); hydroxyacylglutathione hydrolase"	7.69738	7.3635	7.25878	0.438599	0.00627354	0.104718	0.12458	1980	2060	0.0572	0.851
AT1G06135	NA	3.30341	3.39314	3.46114	-0.157729	0.131405	-0.0679982	0.218916	0	0	0	0
AT1G06137	NA	3.44821	3.85886	3.68195	-0.233745	0.204981	0.176908	0.248305	0	0	0	0
AT1G06140	pentatricopeptide (PPR) repeat-containing protein	3.79937	3.77654	3.66055	0.138815	0.0996224	0.115988	0.138559	133	124	-0.103	1
AT1G06148	other RNA	4.05938	4.36164	4.11597	-0.0565966	0.371431	0.245668	0.0406877	3.82	4.74	0.311	0.948
AT1G06160	ethylene-responsive factor, putative	3.32142	3.21104	3.42362	-0.102204	0.1642	-0.212587	0.0199221	0	0.256	0	1
AT1G06170	basic helix-loop-helix (bHLH) family protein	3.37679	3.43125	3.38431	-0.00752338	0.453625	0.0469361	0.240494	3.32	3.71	0.159	1
AT1G06180	"ATMYB13 (myb domain protein 13); DNA binding / transcription factor"	5.83812	3.33558	6.07072	-0.232605	0.0856261	-2.73515	1.98e-07	113	117	0.0381	0.977
AT1G06190	ATP binding / ATPase, coupled to transmembrane movement of ions, phosphorylative mechanism	6.12523	6.38992	5.83143	0.293801	0.0166726	0.558494	0.000193173	1060	897	-0.238	0.366
AT1G06200	serine-type peptidase/ signal peptidase	7.6566	7.5906	7.37807	0.278531	0.0174556	0.212531	0.0267157	2410	2440	0.0172	1
AT1G06210	VHS domain-containing protein / GAT domain-containing protein	6.19942	6.32523	6.20927	-0.00984854	0.444336	0.115966	0.0754694	4270	4320	0.0173	1
AT1G06220	"MEE5 (maternal effect embryo arrest 5); translation elongation factor/ translation factor, nucleic acid binding"	5.46232	5.61079	5.42852	0.0337922	0.399327	0.182263	0.0409388	10800	9790	-0.143	0.143
AT1G06225	"CLE3 (CLAVATA3/ESR-RELATED 3); receptor binding"	3.91121	3.97262	3.81258	0.0986302	0.209818	0.160044	0.049105	0	0	0	0
AT1G06230	"GTE4 (GLOBAL TRANSCRIPTION FACTOR GROUP E 4); DNA binding"	6.17871	5.74474	6.29725	-0.118543	0.302141	-0.552511	0.00619427	7460	7380	-0.0158	0.988
AT1G06240	oxidoreductase/ transition metal ion binding	5.99136	6.03548	5.77396	0.217401	0.0488663	0.261514	0.0150318	907	1030	0.178	0.336
AT1G06250	lipase class 3 family protein	3.68604	3.4494	3.56126	0.12478	0.167523	-0.11186	0.180003	235	292	0.313	0.213
AT1G06260	cysteine proteinase, putative	3.72128	3.76918	3.77424	-0.0529683	0.334791	-0.0050596	0.346259	19.4	21.6	0.155	0.997
AT1G06265	other RNA	5.20558	4.08021	4.77756	0.428018	0.0015812	-0.697351	0.000648032	246	263	0.0958	1
AT1G06270	pentatricopeptide (PPR) repeat-containing protein	5.02718	5.41322	5.07392	-0.0467386	0.366324	0.339294	0.00614386	563	545	-0.0489	1
AT1G06280	LBD2 (LOB DOMAIN-CONTAINING PROTEIN 2)	3.5845	3.76837	3.6543	-0.0698061	0.307379	0.11407	0.180267	0	0	0	0
AT1G06290	"ACX3 (ACYL-COA OXIDASE 3); acyl-CoA oxidase"	4.53362	4.56635	4.85283	-0.319202	0.00963827	-0.28648	0.0045463	2510	2660	0.0839	0.792
AT1G06310	"ACX6 (ACYL-COA OXIDASE 6); acyl-CoA oxidase"	3.90277	3.84422	3.82836	0.0744141	0.21128	0.0158673	0.316122	120	134	0.16	0.951
AT1G06320	NA	3.59367	3.51465	3.32236	0.271311	0.0199693	0.192287	0.047366	18.6	19.5	0.0661	1
AT1G06330	copper-binding family protein	3.64311	4.09312	3.64565	-0.00254802	0.471667	0.447469	0.0162242	1.22	0	0	0.894
AT1G06340	agenet domain-containing protein	3.67245	3.76987	3.77193	-0.0994815	0.259821	-0.00205971	0.351498	0.974	3.72	1.93	0.878
AT1G06350	fatty acid desaturase family protein	4.97225	3.6938	4.08471	0.887538	0.000793572	-0.390906	0.010594	432	395	-0.132	0.921
AT1G06360	fatty acid desaturase family protein	4.99534	3.76111	3.84985	1.1455	0.00350852	-0.0887375	0.220987	48.5	137	1.5	0.00115
AT1G06380	ribosomal protein-related	5.91951	6.74588	5.33354	0.585973	0.00240693	1.41234	6.29e-06	646	491	-0.395	0.0655
AT1G06390	"GSK1 (GSK3/SHAGGY-LIKE PROTEIN KINASE 1); kinase"	7.13403	6.81553	6.62209	0.511942	0.00094838	0.19344	0.0314045	5360	5480	0.0304	0.922
AT1G06400	"ARA2 (Arabidopsis Rab GTPase homolog A1a); GTP binding"	8.82003	7.75664	8.98244	-0.162411	0.0509493	-1.22581	9.05e-07	2970	3140	0.0809	0.781
AT1G06410	"ATTPS7 (Arabidopsis thaliana trehalose-phosphatase/synthase 7); transferase, transferring glycosyl groups / trehalose-phosphatase"	6.58207	6.1563	6.84613	-0.264053	0.0587989	-0.689823	0.000464125	9100	9330	0.0359	1
AT1G06420	unknown protein	7.52764	7.04062	6.84766	0.679973	0.000932732	0.192958	0.0533877	2110	2570	0.285	0.309
AT1G06430	"FTSH8 (FtsH protease 8); ATP-dependent peptidase/ ATPase/ metallopeptidase/ zinc ion binding"	6.6342	5.89863	7.07607	-0.441874	0.0010846	-1.17745	4.51e-06	1490	2110	0.501	7.47e-05
AT1G06440	NA	4.53551	4.46867	4.4249	0.110612	0.113034	0.0437724	0.25011	293	321	0.133	0.911
AT1G06450	CCR4-NOT transcription complex protein, putative	7.90737	8.51535	7.93237	-0.0249952	0.388076	0.582979	5.01e-05	1330	1450	0.117	0.854
AT1G06460	ACD32.1 (ALPHA-CRYSTALLIN DOMAIN 31.2)	6.53416	5.87121	6.33667	0.197486	0.0770104	-0.465462	0.00169848	647	679	0.0691	1
AT1G06470	phosphate translocator-related	5.41335	5.87978	5.49489	-0.0815406	0.239452	0.384885	0.00546874	2800	2370	-0.24	0.233
AT1G06475	unknown protein	4.81428	8.04681	4.61646	0.197829	0.0632413	3.43036	1.98e-07	138	139	0.0158	0.98
AT1G06490	"ATGSL07 (GLUCAN SYNTHASE-LIKE 7); 1,3-beta-glucan synthase/ transferase, transferring glycosyl groups"	3.69826	3.79519	3.79375	-0.0954945	0.133764	0.0014359	0.351708	549	537	-0.0331	1
AT1G06500	NA	7.32233	7.55911	7.31097	0.0113531	0.450749	0.248131	0.0127032	1050	1150	0.126	0.741
AT1G06510	NA	5.33324	4.93138	5.01572	0.317517	0.0336067	-0.0843469	0.208314	393	388	-0.0157	1
AT1G06515	NA	7.5551	7.64232	7.4018	0.153301	0.114777	0.240528	0.0159223	1550	1380	-0.173	0.535
AT1G06520	"ATGPAT1/GPAT1 (GLYCEROL-3-PHOSPHATE ACYLTRANSFERASE 1); 1-acylglycerol-3-phosphate O-acyltransferase/ acyltransferase"	6.57118	8.1868	6.86169	-0.290518	0.00510894	1.32511	7.46e-07	5080	5610	0.143	0.67
AT1G06530	myosin heavy chain-related	7.15311	7.67665	7.00544	0.147665	0.0663576	0.671209	2.29e-05	2740	2380	-0.199	0.105
AT1G06540	NA	4.1645	6.18324	4.21059	-0.0460859	0.328385	1.97266	6.84e-07	288	298	0.0504	1
AT1G06550	enoyl-CoA hydratase/isomerase family protein	6.05346	8.21884	5.58487	0.468584	0.00293792	2.63397	1.47e-07	28100	27200	-0.045	0.911
AT1G06560	NOL1/NOP2/sun family protein	5.05026	5.51285	4.70376	0.346493	0.00587507	0.809091	1.44e-05	1260	1010	-0.313	0.0444
AT1G06570	PDS1 (PHYTOENE DESATURATION 1)	8.08223	6.50741	8.80049	-0.718267	0.000628716	-2.29308	2.43e-07	1460	1670	0.196	0.336
AT1G06580	pentatricopeptide (PPR) repeat-containing protein	4.55059	4.33728	4.35914	0.191451	0.023266	-0.0218589	0.288142	315	340	0.113	0.916
AT1G06590	binding	4.61094	4.58659	4.57749	0.0334514	0.391446	0.00910223	0.334616	1850	1750	-0.0815	0.975
AT1G06620	2-oxoglutarate-dependent dioxygenase, putative	5.18862	4.95027	4.69355	0.495076	0.0175205	0.256724	0.0377726	558	777	0.478	0.463
AT1G06630	F-box family protein	8.23838	7.84734	7.8876	0.350776	0.011274	-0.040261	0.237296	1870	2100	0.165	0.448
AT1G06640	2-oxoglutarate-dependent dioxygenase, putative	4.43624	4.509	4.65077	-0.214523	0.0396756	-0.141767	0.100942	2810	2710	-0.0518	0.998
AT1G06645	NA	3.62017	3.96785	3.77793	-0.157753	0.134588	0.189923	0.0573889	14.1	21.4	0.608	0.859
AT1G06650	2-oxoglutarate-dependent dioxygenase, putative	5.34631	4.8103	6.19485	-0.848534	0.000204801	-1.38455	4.52e-06	412	648	0.653	7.1e-05
AT1G06660	NA	3.81796	3.94033	3.71028	0.107685	0.136631	0.230051	0.00796245	814	945	0.215	0.375
AT1G06670	NIH (NUCLEAR DEIH-BOXHELICASE)	4.98754	5.08206	4.97359	0.0139467	0.446513	0.10847	0.15873	7050	5990	-0.234	0.0276
AT1G06680	"PSBP-1 (OXYGEN-EVOLVING ENHANCER PROTEIN 2); poly(U) binding"	10.0062	8.64548	9.83519	0.171033	0.0432692	-1.1897	1.18e-06	6630	9830	0.567	1.49e-10
AT1G06690	aldo/keto reductase family protein	5.02084	5.03465	4.84323	0.177609	0.136645	0.191416	0.0456481	516	653	0.339	0.113
AT1G06700	serine/threonine protein kinase, putative	7.53225	6.14164	7.47905	0.0531976	0.268494	-1.33741	8.74e-07	2960	2940	-0.0108	1
AT1G06710	pentatricopeptide (PPR) repeat-containing protein	4.12219	4.21276	3.87289	0.249299	0.00874176	0.339865	0.00111069	757	644	-0.232	0.238
AT1G06720	NA	4.68139	4.81329	4.32063	0.360765	0.0055161	0.492668	0.00080878	3050	2100	-0.54	0.00174
AT1G06730	pfkB-type carbohydrate kinase family protein	5.60028	5.88097	5.51682	0.0834614	0.19893	0.364155	0.000886844	1470	1380	-0.0894	0.593
AT1G06740	transposable element gene	5.09596	5.16095	4.97594	0.120021	0.102031	0.185006	0.0280377	755	722	-0.0644	0.785
AT1G06750	NA	4.14726	4.13442	4.03648	0.110782	0.147312	0.0979458	0.113436	37.2	41.8	0.171	1
AT1G06750	NA	3.28573	3.34	3.27253	0.0132025	0.433856	0.0674704	0.183243	37.2	41.8	0.171	1
AT1G06760	histone H1, putative	10.3433	10.1179	10.7287	-0.385329	0.00158618	-0.610771	3.17e-05	21500	23900	0.148	0.44
AT1G06770	zinc finger (C3HC4-type RING finger) family protein	5.58723	5.30977	5.30998	0.277246	0.00634831	-0.000215728	0.355517	712	626	-0.186	0.715
AT1G06780	"GAUT6 (Galacturonosyltransferase 6); polygalacturonate 4-alpha-galacturonosyltransferase/ transferase, transferring glycosyl groups"	5.96863	6.13965	6.33307	-0.364445	0.00634831	-0.193428	0.0440745	2920	2580	-0.181	0.317
AT1G06790	RNA polymerase Rpb7 N-terminal domain-containing protein	6.60378	7.18068	6.09315	0.510632	0.00437711	1.08754	1.89e-06	1250	990	-0.334	0.0217
AT1G06800	lipase class 3 family protein	4.62947	4.40374	4.45858	0.170896	0.0492227	-0.0548339	0.208387	391	437	0.161	0.812
AT1G06810	NA	4.28417	3.98499	4.16246	0.121702	0.240183	-0.177472	0.101951	3.57	3.04	-0.233	1
AT1G06820	"CRTISO (CAROTENOID ISOMERASE); carotenoid isomerase"	5.38935	5.53766	5.12939	0.259958	0.0298638	0.40827	0.000498847	1800	1720	-0.0676	0.964
AT1G06830	glutaredoxin family protein	3.86764	3.78255	3.70581	0.161836	0.121341	0.0767483	0.165952	4.39	0	0	0.798
AT1G06840	leucine-rich repeat transmembrane protein kinase, putative	4.89281	4.86743	4.83647	0.0563373	0.306372	0.0309566	0.278016	2720	2630	-0.0496	0.904
AT1G06850	"ATBZIP52 (ARABIDOPSIS THALIANA BASIC LEUCINE ZIPPER 52); DNA binding / transcription factor"	4.48167	5.30338	4.44546	0.0362079	0.362255	0.857917	1.14e-05	1230	1200	-0.0306	1
AT1G06870	signal peptidase, putative	5.9334	6.4426	6.08189	-0.148483	0.056768	0.360713	0.00106879	3250	3080	-0.0782	0.853
AT1G06890	transporter-related	7.37706	7.27259	7.68523	-0.308165	0.008707	-0.412635	0.000977246	7250	6790	-0.095	0.619
AT1G06900	metalloendopeptidase	5.04266	5.23491	4.82196	0.2207	0.0163955	0.412954	0.000367846	4110	3290	-0.319	0.0064
AT1G06910	"TRFL7 (TRF-LIKE 7); DNA binding / transcription factor"	4.45224	4.33428	4.28024	0.172001	0.0645431	0.0540415	0.216895	652	691	0.0836	0.906
AT1G06920	ATOFP4/OFP4 (ARABIDOPSIS THALIANA OVATE FAMILY PROTEIN 4)	2.99063	3.05349	3.03349	-0.0428615	0.325626	0.0199979	0.30887	3.09	1.84	-0.747	1
AT1G06923	NA	3.58852	3.65731	3.55596	0.0325583	0.407386	0.101347	0.164061	0	0.291	0	1
AT1G06925	NA	3.72702	3.69933	3.84572	-0.118698	0.246688	-0.146391	0.117727	0	0	0	0
AT1G06930	unknown protein	4.16827	4.23824	4.29555	-0.127272	0.185258	-0.057304	0.256893	0	0.256	0	1
AT1G06950	ATTIC110/TIC110 (TRANSLOCON AT THE INNER ENVELOPE MEMBRANE OF CHLOROPLASTS 110)	5.82422	6.0203	5.43324	0.390979	0.00208448	0.587063	0.000155238	6770	5780	-0.227	0.0206
AT1G06960	small nuclear ribonucleoprotein U2B, putative / spliceosomal protein, putative	7.47505	7.58331	6.88674	0.588309	0.000860177	0.696573	1.22e-05	2060	2010	-0.0401	0.942
AT1G06970	"ATCHX14/CHX14 (CATION/HYDROGEN EXCHANGER 14); monovalent cation:proton antiporter/ sodium:hydrogen antiporter"	4.02233	3.95661	3.96755	0.054778	0.32214	-0.0109448	0.331278	8.37	19.6	1.23	0.585
AT1G06980	NA	3.96213	3.8585	4.06597	-0.10384	0.17236	-0.207464	0.0417297	3.74	5.87	0.653	0.813
AT1G06990	GDSL-motif lipase/hydrolase family protein	3.43027	3.49295	3.5238	-0.0935267	0.243448	-0.0308484	0.275376	0	0	0	0
AT1G07000	"ATEXO70B2 (exocyst subunit EXO70 family protein B2); protein binding"	5.35295	5.43413	5.60651	-0.253551	0.0403951	-0.172372	0.0256597	385	506	0.397	0.079
AT1G07010	calcineurin-like phosphoesterase family protein	5.61472	5.81783	5.49997	0.114743	0.105189	0.317852	0.00128846	836	888	0.0883	0.894
AT1G07020	NA	7.69718	7.8202	7.57697	0.120215	0.150097	0.243232	0.00750214	1460	1430	-0.0294	1
AT1G07025	mitochondrial substrate carrier family protein	3.8729	3.93326	3.9901	-0.117194	0.265944	-0.0568317	0.271389	0	0.256	0	1
AT1G07030	mitochondrial substrate carrier family protein	6.97448	7.12212	6.99024	-0.0157626	0.440155	0.131878	0.110238	1660	1530	-0.112	0.659
AT1G07040	NA	8.2732	6.41391	8.85937	-0.586164	0.00141598	-2.44546	1.02e-07	3030	3250	0.103	0.474
AT1G07050	CONSTANS-like protein-related	3.62192	3.50068	3.19771	0.424211	0.0137007	0.302979	0.0323721	43.4	41.1	-0.0797	1
AT1G07051	"MIR847a; miRNA"	2.95671	3.04687	3.00812	-0.0514178	0.411348	0.0387475	0.312579	0	0	0	0
AT1G07060	NA	3.40204	3.6293	3.57307	-0.171036	0.11144	0.0562279	0.246694	5.02	7.46	0.573	1
AT1G07070	60S ribosomal protein L35a (RPL35aA)	7.31232	8.68977	6.84227	0.470054	0.0093474	1.8475	1.48e-06	1690	1210	-0.477	0.000647
AT1G07080	gamma interferon responsive lysosomal thiol reductase family protein / GILT family protein	8.51955	8.74243	8.67525	-0.155692	0.0439517	0.0671859	0.148123	5700	6970	0.291	0.0112
AT1G07090	NA	6.62286	9.71016	6.77595	-0.153096	0.111114	2.93421	7.31e-08	6210	6020	-0.0468	0.971
AT1G07110	"F2KP (FRUCTOSE-2,6-BISPHOSPHATASE); fructose-2,6-bisphosphate 2-phosphatase"	6.25444	5.60372	6.05374	0.200695	0.0189716	-0.450022	0.000186924	2430	2890	0.25	0.0767
AT1G07119	other RNA	3.74464	4.07538	3.85517	-0.110534	0.185022	0.220209	0.0166107	85.7	61	-0.491	0.971
AT1G07120	NA	3.44857	3.81168	3.38667	0.0619038	0.275199	0.425017	0.00103786	32.1	65.1	1.02	0.517
AT1G07130	OB-fold nucleic acid binding domain-containing protein	6.10501	6.38258	5.83099	0.274016	0.0132507	0.551583	0.000290411	117	143	0.294	0.673
AT1G07135	glycine-rich protein	9.26098	8.66511	8.35031	0.910669	0.00369349	0.314801	0.168571	4690	7170	0.612	0.121
AT1G07140	"SIRANBP (Ran-binding protein 1a); Ran GTPase binding"	6.86961	7.61361	6.96633	-0.096721	0.160751	0.647282	4.28e-05	8980	8010	-0.165	0.132
AT1G07150	"MAPKKK13 (Mitogen-activated protein kinase kinase kinase 13); kinase"	6.58638	4.50939	7.84572	-1.25934	0.000353415	-3.33633	2.18e-07	56	136	1.28	0.00128
AT1G07160	protein phosphatase 2C, putative / PP2C, putative	3.95677	4.10127	4.12114	-0.164368	0.0883719	-0.019874	0.321998	1.95	0	0	0.825
AT1G07170	NA	9.08073	8.45124	8.61375	0.466981	0.00162337	-0.16251	0.0473282	957	930	-0.04	1
AT1G07175	NA	3.36372	3.17121	3.30889	0.0548358	0.384365	-0.137677	0.161545	0	0	0	0
AT1G07180	"ATNDI1/NDA1 (ALTERNATIVE NAD(P)H DEHYDROGENASE 1); NADH dehydrogenase"	5.19277	6.05287	4.95286	0.239913	0.0356592	1.10001	1.23e-05	294	258	-0.189	0.505
AT1G07190	NA	3.24496	3.44502	3.13758	0.107383	0.231338	0.307438	0.0182551	0.568	0	0	1
AT1G07200	ATP-dependent Clp protease ClpB protein-related	6.09746	5.16028	6.04367	0.0537925	0.297274	-0.883384	2.16e-05	1610	1990	0.31	0.00681
AT1G07210	30S ribosomal protein S18 family	6.50426	7.00578	5.94432	0.559948	0.00189008	1.06146	1.79e-05	3370	3030	-0.153	0.332
AT1G07220	NA	5.8346	6.21071	5.74663	0.0879663	0.181483	0.464084	0.00025299	1180	1200	0.0268	1
AT1G07230	phosphoesterase family protein	7.12195	6.34317	6.91984	0.202111	0.0236186	-0.576678	0.000154887	3980	5140	0.369	0.0102
AT1G07240	UDP-glucoronosyl/UDP-glucosyl transferase family protein	5.53726	4.72525	5.59527	-0.0580085	0.307439	-0.870021	3.2e-05	180	140	-0.366	0.408
AT1G07250	UDP-glucoronosyl/UDP-glucosyl transferase family protein	7.71799	7.639	8.24337	-0.525382	0.000902155	-0.604374	0.00020184	1650	1830	0.153	0.279
AT1G07260	UDP-glucoronosyl/UDP-glucosyl transferase family protein	4.37887	4.58372	4.32053	0.0583401	0.31038	0.263196	0.00922085	236	184	-0.364	0.239
AT1G07270	cell division control protein CDC6b, putative (CDC6b)	3.34989	3.80172	3.40768	-0.0577902	0.26657	0.394046	0.000818212	328	234	-0.488	0.0966
AT1G07280	binding	6.94192	5.62187	6.92531	0.0166129	0.437117	-1.30344	5.97e-06	1790	2180	0.289	0.65
AT1G07290	nucleotide-sugar transporter family protein	4.67167	4.76261	4.42243	0.24924	0.0422204	0.340187	0.0134166	171	157	-0.121	0.966
AT1G07300	josephin protein-related	6.77063	5.63294	6.61003	0.160602	0.233274	-0.977096	2.21e-05	380	418	0.137	0.503
AT1G07310	C2 domain-containing protein	7.57149	7.36254	7.98442	-0.412926	0.00150574	-0.621874	4.49e-05	2580	3450	0.419	0.000269
AT1G07320	"RPL4 (ribosomal protein L4); poly(U) binding / structural constituent of ribosome"	8.14829	7.92783	7.16482	0.983476	0.000532647	0.763015	0.000228928	2470	2560	0.0527	0.793
AT1G07330	NA	3.22091	3.2174	3.23893	-0.0180252	0.427639	-0.0215306	0.303287	10.5	8.9	-0.238	1
AT1G07340	"ATSTP2 (SUGAR TRANSPORTER 2); carbohydrate transmembrane transporter/ sugar:hydrogen ion symporter"	4.29292	4.07028	4.32123	-0.028312	0.393825	-0.250954	0.0148146	0.326	2.34	2.84	0.895
AT1G07350	transformer serine/arginine-rich ribonucleoprotein, putative	7.19542	7.16284	7.08162	0.113803	0.337997	0.0812296	0.244449	3360	3890	0.212	0.849
AT1G07360	zinc finger (CCCH-type) family protein / RNA recognition motif (RRM)-containing protein	7.17826	7.56844	7.03736	0.140901	0.0753782	0.531088	8.21e-05	3750	4070	0.121	0.825
AT1G07370	"PCNA1 (PROLIFERATING CELLULAR NUCLEAR ANTIGEN); DNA binding / DNA polymerase processivity factor"	6.19107	8.72274	5.43689	0.754181	0.00175647	3.28585	1.05e-07	4430	3490	-0.343	0.000731
AT1G07380	ceramidase family protein	5.08198	4.80892	5.57892	-0.496946	0.00110845	-0.770004	9.91e-06	491	588	0.259	0.148
AT1G07390	protein binding	4.25574	4.15645	4.5078	-0.252059	0.00987717	-0.351344	0.00108587	179	206	0.199	0.923
AT1G07400	17.8 kDa class I heat shock protein (HSP17.8-CI)	6.64666	5.75731	6.78967	-0.143014	0.393046	-1.03236	0.0652313	511	875	0.777	0.47
AT1G07410	"AtRABA2b (Arabidopsis Rab GTPase homolog A2b); GTP binding"	5.32165	6.06799	5.55294	-0.231293	0.100137	0.515055	0.00438436	457	416	-0.135	0.771
AT1G07420	"SMO2-2 (sterol 4-alpha-methyl-oxidase 2); C-4 methylsterol oxidase"	7.25245	8.10862	6.93224	0.320212	0.0106094	1.17639	2.21e-06	5020	4030	-0.317	0.00339
AT1G07430	protein phosphatase 2C, putative / PP2C, putative	4.91939	4.36626	5.84744	-0.928047	0.00275566	-1.48118	4.66e-05	13.1	35.4	1.44	0.169
AT1G07440	tropinone reductase, putative / tropine dehydrogenase, putative	6.82429	5.99652	6.91299	-0.0887013	0.27478	-0.916477	8.29e-06	237	314	0.407	0.239
AT1G07450	tropinone reductase, putative / tropine dehydrogenase, putative	3.76117	3.67745	3.80112	-0.0399548	0.370813	-0.123673	0.0587296	1.79	3.69	1.04	1
AT1G07460	legume lectin family protein	3.492	3.61766	3.61312	-0.121112	0.0901732	0.00453974	0.346623	0	0	0	0
AT1G07470	transcription factor IIA large subunit, putative / TFIIA large subunit, putative	6.3175	5.79205	6.18281	0.134686	0.168016	-0.390768	0.00394542	1720	1810	0.0787	0.861
AT1G07473	NA	3.48577	3.67862	3.56422	-0.0784467	0.221965	0.114406	0.0936725	13.2	15.3	0.214	1
AT1G07476	NA	3.6341	3.57839	3.57821	0.0558909	0.316873	0.000175109	0.35565	2.26	4.61	1.02	1
AT1G07480	transcription factor IIA large subunit / TFIIA large subunit (TFIIA-L)	5.0516	4.72545	4.95065	0.100944	0.188185	-0.225205	0.0540725	1510	1720	0.184	0.204
AT1G07485	unknown protein	3.04308	3.04024	2.96384	0.0792468	0.237524	0.0763995	0.205646	0	0.57	0	1
AT1G07490	DVL9/RTFL3 (ROTUNDIFOLIA LIKE 3)	4.32958	4.3259	4.35253	-0.0229552	0.444177	-0.0266348	0.325084	7.79	2.39	-1.71	0.542
AT1G07500	unknown protein	4.04776	4.14038	4.01511	0.0326521	0.433235	0.125276	0.190735	0	1.18	0	0.984
AT1G07510	"FTSH10 (FtsH protease 10); ATPase"	6.10256	6.49855	6.15761	-0.0550445	0.278681	0.340938	0.00284802	6060	6350	0.0695	0.975
AT1G07520	scarecrow transcription factor family protein	6.13344	5.52202	5.93695	0.19649	0.0883719	-0.414929	0.0105504	1210	1430	0.241	0.385
AT1G07530	scarecrow-like transcription factor 14 (SCL14)	7.7983	6.27645	7.6062	0.1921	0.0328765	-1.32975	7.05e-07	2940	3730	0.342	0.00138
AT1G07540	"TRFL2 (TRF-LIKE 2); DNA binding"	3.62421	3.63676	3.72187	-0.0976619	0.207684	-0.0851126	0.162426	6.67	7.28	0.128	1
AT1G07550	leucine-rich repeat protein kinase, putative	3.22517	3.25223	3.19718	0.0279879	0.386906	0.0550474	0.209817	0	0	0	0
AT1G07560	leucine-rich repeat protein kinase, putative	3.42913	3.42827	3.4601	-0.0309675	0.358502	-0.0318259	0.253194	0	0.256	0	1
AT1G07570	"APK1A (Arabidopsis protein kinase 1A); kinase"	7.35265	7.00678	7.31286	0.0397853	0.34319	-0.30608	0.00151234	2780	2670	-0.0595	0.873
AT1G07590	pentatricopeptide (PPR) repeat-containing protein	5.0733	4.54551	5.29462	-0.22132	0.167383	-0.749113	0.000287374	384	456	0.247	0.631
AT1G07610	MT1C (metallothionein 1C)	7.14281	6.63533	7.96958	-0.826767	0.000279654	-1.33425	1.14e-05	7.79	11	0.493	1
AT1G07615	GTP binding	5.67332	5.69319	5.12012	0.553201	0.00808189	0.573069	0.00291001	945	797	-0.245	0.573
AT1G07620	NA	3.1971	3.16593	3.23016	-0.0330582	0.376169	-0.0642301	0.190113	0.326	1.15	1.82	1
AT1G07630	"PLL5 (POL-like 5); protein serine/threonine phosphatase"	5.42653	5.19896	5.99052	-0.563992	0.000723504	-0.791563	9.08e-06	1330	1400	0.0745	0.898
AT1G07640	"OBP2 (OBF BINDING PROTEIN 2); DNA binding / transcription factor"	7.51024	8.63043	7.74453	-0.234289	0.0107933	0.885909	2.65e-05	2990	3200	0.0977	0.641
AT1G07645	lactoylglutathione lyase family protein / glyoxalase I family protein	3.61612	3.82194	3.75454	-0.138419	0.240008	0.0673989	0.274538	1.05	0.57	-0.884	1
AT1G07650	leucine-rich repeat transmembrane protein kinase, putative	6.14062	4.82897	6.32864	-0.188025	0.0292631	-1.49968	7.4e-07	6000	5880	-0.0288	1
AT1G07660	histone H4	5.27099	5.681	5.16671	0.104282	0.239568	0.514288	0.000771904	4000	4060	0.0203	0.953
AT1G07670	calcium-transporting ATPase	5.77333	5.95068	6.26011	-0.486785	0.00063184	-0.309431	0.0112141	18400	18800	0.0298	1
AT1G07680	NA	3.84466	3.87507	3.89647	-0.0518069	0.307553	-0.021397	0.29234	1.3	0	0	0.887
AT1G07690	NA	4.23886	5.54584	4.17581	0.0630529	0.339862	1.37003	2.12e-06	10.6	28.2	1.41	0.364
AT1G07700	thioredoxin family protein	7.04984	6.74224	7.17732	-0.127483	0.144831	-0.435076	0.000215377	662	689	0.0587	0.808
AT1G07702	snoRNA	2.93937	3.24349	3.30181	-0.362442	0.0337694	-0.0583235	0.309616	0	0	0	0
AT1G07705	transcription regulator	5.09276	5.56324	5.11081	-0.018048	0.41412	0.452426	0.000891946	2410	2230	-0.11	0.498
AT1G07710	ankyrin repeat family protein	3.54484	5.99515	3.46664	0.0781998	0.208737	2.5285	1.82e-07	1560	1490	-0.074	0.612
AT1G07720	beta-ketoacyl-CoA synthase family protein	6.99378	8.78967	8.09368	-1.0999	0.000103754	0.69599	9.79e-05	12600	10300	-0.287	0.00285
AT1G07725	"ATEXO70H6 (exocyst subunit EXO70 family protein H6); protein binding"	3.77634	3.8363	3.86296	-0.0866171	0.183562	-0.0266572	0.281867	6.42	8.42	0.392	1
AT1G07728	other RNA	6.10904	5.81418	5.99408	0.114956	0.211557	-0.179903	0.0445259	12.4	14.6	0.231	1
AT1G07745	"ATRAD51D/RAD51D/SSN1 (ARABIDOPSIS HOMOLOG OF RAD51 D); DNA binding"	5.21858	4.84596	4.83521	0.38337	0.00414914	0.0107485	0.3366	292	338	0.214	0.615
AT1G07747	NA	3.5325	3.41745	3.41227	0.120225	0.292559	0.00517643	0.346549	0.485	4.25	3.13	0.779
AT1G07750	cupin family protein	9.77233	9.91485	9.58656	0.185768	0.0255604	0.328292	0.00121893	39100	37900	-0.0457	0.799
AT1G07770	"RPS15A (RIBOSOMAL PROTEIN S15A); structural constituent of ribosome"	11.2177	11.3916	10.6766	0.541099	0.00160576	0.714997	8.8e-05	18400	14300	-0.359	0.000226
AT1G07790	"HTB1; DNA binding"	8.4254	9.88237	8.12158	0.303815	0.0175925	1.76078	7.36e-07	7700	7600	-0.0179	1
AT1G07795	NA	4.83537	6.76477	4.92204	-0.0866654	0.21673	1.84274	1.65e-06	126	131	0.0584	0.935
AT1G07800	transposable element gene	3.54341	3.55596	3.55578	-0.0123742	0.449308	0.000176304	0.35555	0.731	0.511	-0.516	1
AT1G07810	"ECA1 (CALCIUM-TRANSPORTING ATPASE 1, ENDOPLASMIC RETICULUM-TYPE); calcium-transporting ATPase"	6.19507	5.74947	6.80617	-0.6111	0.000994703	-1.0567	3.34e-05	8030	8360	0.058	1
AT1G07820	histone H4	7.97505	8.35111	7.68295	0.292093	0.00994818	0.66816	0.000479786	16500	15400	-0.0998	0.747
AT1G07830	ribosomal protein L29 family protein	8.77793	8.72186	7.98835	0.789579	0.000970584	0.733507	0.00012564	1770	1650	-0.104	0.77
AT1G07840	leucine zipper factor-related	5.34545	5.68026	5.09604	0.249411	0.041859	0.584224	0.000264511	1730	1340	-0.361	0.00256
AT1G07850	fringe-related protein	4.20357	4.34483	4.1219	0.0816689	0.19713	0.222926	0.0118486	49.8	67.1	0.43	0.907
AT1G07860	unknown protein	4.41384	4.3611	4.34928	0.0645535	0.351356	0.0118207	0.345421	9.5	9.46	-0.00641	1
AT1G07870	protein kinase family protein	6.61898	6.73333	6.37934	0.239639	0.0140234	0.353989	0.00710079	3180	3540	0.155	0.718
AT1G07870	protein kinase family protein	5.92681	5.9633	5.70327	0.223531	0.0411343	0.260029	0.0427877	3180	3540	0.155	0.718
AT1G07880	"ATMPK13 (ARABIDOPSIS THALIANA MAP KINASE 13); MAP kinase/ kinase"	3.91969	3.93987	3.71632	0.203379	0.057954	0.22355	0.0242966	167	175	0.0632	1
AT1G07890	"APX1 (ASCORBATE PEROXIDASE 1); L-ascorbate peroxidase"	10.2617	11.3077	10.0906	0.171161	0.0446358	1.21716	8.94e-07	75000	71000	-0.0799	0.596
AT1G07900	LBD1 (LOB DOMAIN-CONTAINING PROTEIN 1)	4.0185	3.92311	4.94056	-0.922053	0.00138615	-1.01744	0.000634468	0	0	0	0
AT1G07910	"ATRNL/RNL (ARABIDOPSIS THALIANA RNA LIGASE); 2',3'-cyclic-nucleotide 3'-phosphodiesterase/ RNA ligase (ATP)/ polynucleotide kinase"	4.53112	4.50161	4.35352	0.177599	0.0435756	0.148093	0.0299933	1970	2010	0.0274	1
AT1G07920	elongation factor 1-alpha / EF-1-alpha	8.33495	8.82505	8.1653	0.169654	0.0432692	0.659749	0.0001966	76600	64400	-0.249	0.0223
AT1G07930	elongation factor 1-alpha / EF-1-alpha	7.22412	7.99849	7.1786	0.04552	0.39281	0.819889	2.74e-05	64200	52300	-0.297	0.0443
AT1G07940	elongation factor 1-alpha / EF-1-alpha	8.0524	8.77058	8.07254	-0.0201477	0.427569	0.698037	8.05e-05	68000	57800	-0.234	0.0456
AT1G07950	surfeit locus protein 5 family protein / SURF5 family protein	6.39642	6.34085	6.29082	0.105595	0.18603	0.0500317	0.238302	1140	1130	-0.0182	1
AT1G07960	"ATPDIL5-1 (PDI-LIKE 5-1); thiol-disulfide exchange intermediate"	8.05778	8.14689	8.17049	-0.112712	0.118359	-0.0236061	0.295815	2240	2110	-0.0906	0.971
AT1G07970	NA	6.18792	6.38227	5.57872	0.609204	0.000289108	0.803555	1.21e-05	3390	3060	-0.149	0.368
AT1G07980	histone-like transcription factor (CBF/NF-Y) family protein	6.52924	6.83217	6.4393	0.0899403	0.221715	0.392868	0.00434037	1360	1410	0.0502	0.942
AT1G07985	Expressed protein	4.9324	3.92371	5.11622	-0.183823	0.16041	-1.19251	3.2e-06	2.61	1.63	-0.679	1
AT1G07990	SIT4 phosphatase-associated family protein	5.59884	5.07906	5.56399	0.0348486	0.370426	-0.484933	0.000206436	4400	4740	0.109	0.613
AT1G08000	zinc finger (GATA type) family protein	6.22517	6.61874	5.93952	0.285656	0.0208186	0.679219	7.86e-05	1130	1130	-0.00476	1
AT1G08005	NA	2.79672	2.65861	2.81712	-0.0203948	0.440507	-0.158508	0.101893	0.326	0.896	1.46	1
AT1G08010	zinc finger (GATA type) family protein	6.19696	6.23499	6.04868	0.148275	0.206325	0.186309	0.0459356	2520	2540	0.0105	1
AT1G08030	NA	5.26772	5.26501	5.28151	-0.0137952	0.429387	-0.0164993	0.315761	2330	2210	-0.074	0.754
AT1G08035	NA	3.44272	3.20227	3.59917	-0.156446	0.228923	-0.396898	0.047366	3.24	8.66	1.42	0.846
AT1G08040	NA	6.55187	6.54027	6.31461	0.237267	0.00949392	0.225667	0.00623022	3150	3510	0.156	0.366
AT1G08050	zinc finger (C3HC4-type RING finger) family protein	4.64026	5.46862	4.89458	-0.254324	0.0133431	0.574038	0.00226604	228	312	0.455	0.757
AT1G08060	MOM (MAINTENANCE OF METHYLATION)	4.54042	4.35384	4.57869	-0.0382694	0.380045	-0.224849	0.0253251	4780	5180	0.114	0.592
AT1G08065	carbonate dehydratase/ zinc ion binding	3.32366	3.94492	3.31296	0.0107008	0.44146	0.63196	0.000397986	0.242	1.85	2.93	0.953
AT1G08070	pentatricopeptide (PPR) repeat-containing protein	4.03674	3.93862	3.85141	0.185322	0.0412734	0.0872072	0.113378	140	134	-0.061	1
AT1G08080	carbonic anhydrase family protein	3.60297	3.6947	3.69087	-0.0879013	0.300902	0.00382954	0.351708	0.242	0	0	1
AT1G08090	"ATNRT2:1 (Arabidopsis thaliana high affinity nitrate transporter 2.1); nitrate transmembrane transporter"	4.11832	3.77879	4.14111	-0.0227942	0.410823	-0.362325	0.00205446	0	0.826	0	1
AT1G08100	"ATNRT2.2 (Arabidopsis thaliana high-affinity nitrate transporter 2.2); nitrate transmembrane transporter"	3.81695	3.89336	3.9733	-0.156352	0.08964	-0.0799413	0.141075	0	0	0	0
AT1G08110	lactoylglutathione lyase, putative / glyoxalase I, putative	9.16538	8.64012	8.67791	0.487468	0.00177532	-0.0377872	0.247163	3690	3910	0.0831	0.61
AT1G08120	ATP binding / protein kinase	3.10655	3.22295	3.35445	-0.247897	0.119781	-0.131507	0.186303	5.92	4.87	-0.282	1
AT1G08125	Expressed protein	5.74575	5.64813	5.39723	0.348521	0.00793055	0.250901	0.00803003	1250	1230	-0.0257	1
AT1G08130	"ATLIG1 (ARABIDOPSIS THALIANA DNA LIGASE 1); ATP binding / DNA ligase (ATP)"	5.23357	5.66044	5.04642	0.187145	0.0648905	0.614023	3.21e-05	4540	4280	-0.0859	0.562
AT1G08135	"ATCHX6B/CHX6B (CATION/H+ EXCHANGER 6B); monovalent cation:proton antiporter"	3.33259	3.43081	3.36278	-0.0301962	0.369747	0.0680297	0.173921	0.969	0	0	0.923
AT1G08140	"ATCHX6a (CATION/H+ EXCHANGER 6A); monovalent cation:proton antiporter"	3.22377	3.3871	3.29211	-0.0683429	0.265876	0.0949935	0.120912	2.76	4.22	0.615	0.989
AT1G08150	"ATCHX5 (CATION/H+ EXCHANGER 5); monovalent cation:proton antiporter"	3.53471	3.61511	3.52539	0.00932217	0.44577	0.0897155	0.117396	7.71	9.29	0.269	1
AT1G08160	harpin-induced protein-related / HIN1-related / harpin-responsive protein-related	7.07103	7.45287	7.45037	-0.379347	0.0190519	0.00249593	0.35198	564	531	-0.0857	1
AT1G08165	unknown protein	3.42132	4.6728	3.50774	-0.0864116	0.322948	1.16506	3.8e-05	12.6	14.9	0.239	1
AT1G08170	histone H2B family protein	3.99242	4.01762	4.02999	-0.0375735	0.392124	-0.0123702	0.337519	2.28	3.29	0.532	1
AT1G08180	NA	6.40993	6.80403	6.16085	0.249085	0.0475451	0.643181	0.000346359	363	433	0.255	0.399
AT1G08190	vacuolar assembly protein, putative (VPS41)	5.33094	5.68162	5.43153	-0.100599	0.222574	0.250083	0.0183245	12300	11300	-0.123	0.366
AT1G08200	AXS2 (UDP-D-APIOSE/UDP-D-XYLOSE SYNTHASE 2)	6.72467	7.08793	7.25088	-0.526201	0.0115522	-0.162943	0.114128	22600	21600	-0.0655	0.851
AT1G08210	aspartyl protease family protein	6.83573	6.30512	6.45224	0.38349	0.00567139	-0.147122	0.0338183	1120	1150	0.038	0.845
AT1G08220	NA	5.28204	5.77752	4.80118	0.480859	0.00882259	0.976336	7.04e-06	721	538	-0.423	0.0119
AT1G08230	amino acid transporter family protein	7.28377	5.04839	8.12339	-0.839623	0.000492067	-3.075	5.52e-08	34.8	38.2	0.134	1
AT1G08250	"ADT6 (AROGENATE DEHYDRATASE 6); arogenate dehydratase/ prephenate dehydratase"	5.4404	6.1006	5.22785	0.212547	0.0728285	0.872749	7.19e-06	440	586	0.414	0.0479
AT1G08260	"EMB2284/EMB529/POL2A/TIL1 (EMBRYO DEFECTIVE 2284); DNA-directed DNA polymerase"	4.41949	4.46317	4.21236	0.207126	0.0331148	0.250804	0.0047568	4410	4250	-0.0556	0.884
AT1G08270	NA	4.74794	4.60157	4.89087	-0.142926	0.227555	-0.289294	0.053475	147	156	0.0868	1
AT1G08280	glycosyl transferase family 29 protein / sialyltransferase family protein	5.49196	5.60889	5.62575	-0.133784	0.0818746	-0.0168521	0.303499	471	380	-0.308	0.353
AT1G08290	zinc finger (C2H2 type) protein (WIP3)	3.7154	4.53126	3.70848	0.00691942	0.457352	0.822776	3.42e-05	118	119	0.0215	1
AT1G08300	NA	4.10126	3.69238	3.75243	0.348825	0.00789301	-0.0600488	0.214991	204	168	-0.273	0.767
AT1G08310	esterase/lipase/thioesterase family protein	4.25241	3.6095	4.49435	-0.241942	0.0284597	-0.884846	2.97e-05	11.3	14.7	0.387	1
AT1G08310	esterase/lipase/thioesterase family protein	4.26165	3.61377	4.51675	-0.255091	0.022567	-0.902976	2.23e-05	11.3	14.7	0.387	1
AT1G08315	armadillo/beta-catenin repeat family protein	7.26502	6.2133	8.15471	-0.889685	0.000198364	-1.94141	1.88e-07	393	505	0.361	0.0724
AT1G08320	bZIP family transcription factor	5.08734	3.76759	4.90547	0.181865	0.0383152	-1.13788	1.53e-06	0.242	7.81	5.01	0.17
AT1G08340	rac GTPase activating protein, putative	4.19385	4.17621	4.51752	-0.323673	0.00776387	-0.341307	0.0101632	32.4	37.1	0.195	0.984
AT1G08350	endomembrane protein 70 family protein	5.87813	6.43341	5.41941	0.458713	0.00407337	1.014	2.35e-05	1870	1920	0.0415	0.963
AT1G08360	60S ribosomal protein L10A (RPL10aA)	9.58612	9.90274	9.1492	0.436922	0.00207331	0.753535	3.19e-05	32400	23500	-0.464	7.45e-08
AT1G08370	"DCP1 (DECAPPING 1); m7G(5')pppN diphosphatase/ protein homodimerization"	7.02658	7.03618	7.13186	-0.105282	0.14691	-0.0956765	0.137662	3430	3610	0.0746	0.853
AT1G08380	PSAO (photosystem I subunit O)	9.29138	8.21419	9.04754	0.243841	0.0181728	-0.833347	8.3e-06	2060	2980	0.535	5.34e-07
AT1G08390	nucleic acid binding	6.9381	7.24053	6.22785	0.710253	0.00100385	1.01268	1.52e-05	285	407	0.514	0.0201
AT1G08400	chromosome structural maintenance protein-related	4.54376	4.57539	4.64192	-0.0981557	0.188256	-0.0665226	0.197202	635	631	-0.0105	0.99
AT1G08410	GTP-binding family protein	5.3967	5.73099	4.93184	0.464864	0.00333117	0.799158	3.99e-05	1590	1210	-0.397	0.00106
AT1G08420	kelch repeat-containing protein / serine/threonine phosphoesterase family protein	5.12354	5.08632	5.29795	-0.174418	0.0460165	-0.211635	0.0212585	2690	2840	0.0827	0.7
AT1G08430	"ALMT1/ATALMT1 (AL-ACTIVATED MALATE TRANSPORTER 1); malate transmembrane transporter/"	3.54809	3.74667	3.67685	-0.128764	0.166887	0.0698188	0.239276	0.242	0.546	1.17	1
AT1G08440	NA	3.44892	3.22923	3.24823	0.200693	0.0820698	-0.0189987	0.318936	0	0	0	0
AT1G08450	"CRT3 (CALRETICULIN 3); calcium ion binding"	5.49529	4.9475	5.81077	-0.31548	0.00753204	-0.863267	1.2e-05	309	346	0.163	0.636
AT1G08460	"HDA08 (histone deacetylase 8); histone deacetylase"	7.01985	6.24313	6.68844	0.331411	0.0199948	-0.445316	0.00233689	1050	1500	0.509	0.0001
AT1G08465	"YAB2 (YABBY 2); transcription factor"	4.90648	4.69797	4.51171	0.394765	0.00766511	0.186255	0.076159	414	417	0.0128	1
AT1G08470	strictosidine synthase family protein	6.03966	6.95693	5.75163	0.288025	0.00963252	1.2053	1.81e-06	1770	1900	0.101	0.738
AT1G08480	NA	8.10894	8.81613	8.0451	0.0638367	0.262101	0.771027	8.71e-06	4330	4150	-0.0625	0.891
AT1G08490	"ATCPNIFS/ATNFS2/ATSUFS/CPNIFS/SUFS (CHLOROPLASTIC NIFS-LIKE CYSTEINE DESULFURASE); cysteine desulfurase/ selenocysteine lyase/ transaminase"	6.23053	6.24267	6.37932	-0.148791	0.0604091	-0.136648	0.0333593	1470	1330	-0.143	0.629
AT1G08500	plastocyanin-like domain-containing protein	3.80547	3.69221	3.92071	-0.115239	0.128763	-0.228491	0.0110725	4.37	4.05	-0.112	1
AT1G08510	"FATB (FATTY ACYL-ACP THIOESTERASES B); acyl carrier/ acyl-ACP thioesterase"	7.27662	6.84176	7.61949	-0.342873	0.00670233	-0.777736	1.92e-05	5310	5750	0.116	0.628
AT1G08520	"CHLD/PDE166 (PIGMENT DEFECTIVE 166); magnesium chelatase/ nucleoside-triphosphatase/ nucleotide binding"	5.84595	5.43986	5.81363	0.0323254	0.398363	-0.373761	0.00370118	1890	2050	0.12	0.683
AT1G08530	NA	4.63523	5.16615	4.20251	0.432721	0.00364584	0.963641	2.82e-06	782	743	-0.0739	1
AT1G08540	"SIGB (SIGMA FACTOR B); DNA binding / DNA-directed RNA polymerase/ transcription factor"	5.22976	5.10191	5.27695	-0.0471912	0.367376	-0.175037	0.0703798	1080	1160	0.0995	0.883
AT1G08550	NPQ1 (NON-PHOTOCHEMICAL QUENCHING 1)	5.61442	4.78758	5.38797	0.226448	0.0783253	-0.600389	0.000102423	432	595	0.463	0.172
AT1G08560	"SYP111 (syntaxin 111); SNAP receptor"	5.9077	6.56879	5.10629	0.801407	0.00239814	1.4625	3.81e-06	4870	4850	-0.00659	1
AT1G08570	thioredoxin family protein	8.87743	6.39959	8.79605	0.0813774	0.183248	-2.39646	5.52e-08	1340	2740	1.04	0.000147
AT1G08580	NA	7.24222	8.24326	6.75059	0.491631	0.00760348	1.49267	8.38e-06	3280	2270	-0.53	2.33e-07
AT1G08590	CLAVATA1 receptor kinase (CLV1)	4.31044	3.96399	4.59931	-0.288866	0.00577338	-0.635317	2.41e-05	541	576	0.0892	0.863
AT1G08600	"ATRX/CHR20; ATP binding / DNA binding / helicase"	4.71937	4.78199	4.90424	-0.184871	0.0612075	-0.122254	0.0916095	6240	6300	0.0135	1
AT1G08610	pentatricopeptide (PPR) repeat-containing protein	5.26525	5.19675	4.80036	0.464891	0.00184756	0.396397	0.00145135	421	288	-0.546	0.00603
AT1G08620	transcription factor jumonji (jmj) family protein / zinc finger (C5HC2 type) family protein	5.76197	5.34867	6.23493	-0.472961	0.00384198	-0.886262	0.000112389	4060	4370	0.107	0.658
AT1G08630	"THA1 (THREONINE ALDOLASE 1); aldehyde-lyase/ threonine aldolase"	6.87088	5.34555	6.70723	0.163647	0.194625	-1.36168	3.33e-05	2770	3600	0.381	0.000814
AT1G08640	heat shock protein binding	6.1606	6.48482	5.91192	0.248676	0.0224185	0.572899	6.97e-05	2390	2040	-0.227	0.0928
AT1G08650	"PPCK1 (PHOSPHOENOLPYRUVATE CARBOXYLASE KINASE); kinase"	6.75084	6.02292	6.96739	-0.216547	0.0924107	-0.944471	0.000117402	2210	2320	0.0718	1
AT1G08660	glycosyl transferase family 29 protein / sialyltransferase family protein	6.43462	6.70617	5.87823	0.556393	0.0016881	0.827939	1.8e-05	3230	3200	-0.0103	1
AT1G08670	epsin N-terminal homology (ENTH) domain-containing protein / clathrin assembly protein-related	3.18515	3.23203	3.32248	-0.137334	0.0735998	-0.0904496	0.120184	0	0	0	0
AT1G08680	"ZIGA4 (ARF GAP-LIKE ZINC FINGER-CONTAINING PROTEIN ZIGA4); DNA binding"	5.69399	5.08277	5.73059	-0.0365972	0.352645	-0.647824	8.05e-05	1760	2050	0.22	0.244
AT1G08695	SCRL3 (SCR-Like 3)	3.93073	4.01841	4.11122	-0.180491	0.0608922	-0.0928061	0.266434	0	0	0	0
AT1G08700	presenilin family protein	7.23087	7.84138	7.16623	0.0646385	0.261941	0.675147	3.47e-05	3600	3670	0.0279	1
AT1G08710	F-box family protein	5.65576	5.55408	5.72194	-0.0661739	0.295211	-0.167858	0.0480508	644	624	-0.0446	0.977
AT1G08720	"EDR1 (ENHANCED DISEASE RESISTANCE 1); kinase/ protein serine/threonine/tyrosine kinase"	5.0638	4.79541	5.03288	0.0309188	0.367851	-0.237472	0.0125347	1870	2700	0.528	0.344
AT1G08730	"XIC (Myosin-like protein XIC); motor/ protein binding"	3.59601	3.60593	3.56333	0.0326841	0.360486	0.0426063	0.241883	167	155	-0.107	0.953
AT1G08750	GPI-anchor transamidase, putative	6.27799	6.38333	6.20285	0.0751414	0.232772	0.180479	0.031179	2060	2000	-0.0453	0.973
AT1G08760	NA	5.89666	5.42273	6.06507	-0.168414	0.0761064	-0.642341	6.33e-05	5000	5160	0.044	0.828
AT1G08770	prenylated rab acceptor (PRA1) family protein	7.51565	7.94932	7.50349	0.0121584	0.432751	0.445827	0.000232717	838	881	0.0715	0.978
AT1G08780	"ABI3 (ABI3-INTERACTING PROTEIN 3); unfolded protein binding"	7.01308	7.36694	6.88811	0.124966	0.256661	0.478825	0.00144232	1510	1500	-0.00435	1
AT1G08790	NA	3.80045	3.71506	3.87166	-0.071213	0.318366	-0.1566	0.0720822	3.25	1.73	-0.908	1
AT1G08800	NA	4.67516	4.84412	5.0046	-0.329431	0.00314602	-0.160473	0.0291183	4310	4340	0.00879	1
AT1G08810	"MYB60 (myb domain protein 60); DNA binding / transcription factor"	4.21214	6.4397	3.61352	0.598624	0.00583056	2.82618	1.21e-07	1610	1750	0.126	0.599
AT1G08820	"VAP27-2 (VAMP/SYNAPTOBREVIN-ASSOCIATED PROTEIN 27-2); structural molecule"	6.78184	6.80309	6.81946	-0.0376136	0.362727	-0.0163635	0.316076	6740	7020	0.0584	0.929
AT1G08830	"CSD1 (COPPER/ZINC SUPEROXIDE DISMUTASE 1); copper, zinc superoxide dismutase"	9.23281	9.95037	9.22452	0.00828246	0.451317	0.725846	1.79e-05	29400	17900	-0.715	0.0888
AT1G08840	"EMB2411 (EMBRYO DEFECTIVE 2411); ATP-dependent DNA helicase"	3.99224	3.95938	3.76262	0.229623	0.0112269	0.196767	0.0103656	1200	1070	-0.162	0.439
AT1G08845	structural constituent of ribosome	5.97479	6.15735	5.18326	0.791529	0.000170786	0.974091	6.09e-06	397	333	-0.254	0.241
AT1G08860	BON3 (BONZAI 3)	5.26935	5.78872	5.22032	0.0490338	0.368774	0.568397	0.0122653	1570	2210	0.497	0.793
AT1G08880	"G-H2AX/GAMMA-H2AX/H2AXA/HTA5; DNA binding"	8.33776	8.80016	7.92864	0.409123	0.00272583	0.871515	1.21e-05	6340	6290	-0.0108	1
AT1G08890	sugar transporter family protein	4.37217	3.61239	4.59562	-0.223453	0.0173822	-0.983235	2.48e-06	15.8	33.5	1.09	0.282
AT1G08900	carbohydrate transmembrane transporter	3.92803	3.78496	3.9417	-0.0136725	0.437925	-0.156742	0.0515653	6.57	7.75	0.238	1
AT1G08910	"EMB3001 (EMBRYO DEFECTIVE 3001); zinc ion binding"	5.13582	4.9371	4.92582	0.210006	0.0443669	0.0112825	0.327123	3010	3250	0.111	0.909
AT1G08920	sugar transporter, putative	7.14553	6.22447	8.20969	-1.06417	0.000351338	-1.98522	6.98e-07	2480	2730	0.143	0.814
AT1G08930	"ERD6 (EARLY RESPONSE TO DEHYDRATION 6); carbohydrate transmembrane transporter/ sugar:hydrogen ion symporter"	4.86219	4.45843	4.5636	0.298593	0.00975452	-0.105174	0.0651859	44.7	19.7	-1.18	0.145
AT1G08940	phosphoglycerate/bisphosphoglycerate mutase family protein	6.09286	6.47772	5.53978	0.553078	0.00150545	0.937942	1.27e-05	164	333	1.02	0.0054
AT1G08960	"CAX11 (cation exchanger 11); cation:cation antiporter"	5.59111	6.1727	5.56054	0.030563	0.390299	0.612152	0.000181706	1260	1310	0.0544	0.978
AT1G08970	"HAP5C (HEME ACTIVATED PROTEIN 5C); DNA binding / transcription factor"	8.90955	8.99142	8.69575	0.213804	0.0433392	0.295665	0.00143752	5490	6080	0.147	0.414
AT1G08980	"ATAMI1 (AMIDASE-LIKE PROTEIN 1); amidase"	7.23566	4.86418	6.89783	0.337826	0.0138456	-2.03365	1.43e-07	421	761	0.855	9.93e-08
AT1G08985	DNA binding	3.2047	3.74919	3.06331	0.141392	0.145677	0.685882	0.00164796	2.27	0	0	0.609
AT1G08990	"PGSIP5 (PLANT GLYCOGENIN-LIKE STARCH INITIATION PROTEIN 5); transferase, transferring glycosyl groups"	3.59862	3.35193	3.65823	-0.0596124	0.292559	-0.306305	0.0100803	2.92	0	0	0.866
AT1G09000	"ANP1 (NPK1-RELATED PROTEIN KINASE 1S); kinase"	4.45987	4.93184	4.45901	0.000862156	0.472249	0.472835	0.0013518	1140	1020	-0.161	0.273
AT1G09010	glycoside hydrolase family 2 protein	6.37128	5.38588	6.69409	-0.322809	0.00450857	-1.30821	7.77e-07	1930	2180	0.181	0.186
AT1G09020	SNF4 (Sucrose NonFermenting 4)	5.97248	6.13317	6.18787	-0.215385	0.0235424	-0.0546957	0.198265	5660	5450	-0.0562	0.758
AT1G09026	unknown protein	4.48028	4.22538	4.25564	0.224634	0.288374	-0.0302614	0.336856	0	0	0	0
AT1G09030	histone-like transcription factor (CBF/NF-Y) family protein	3.66101	3.64628	3.6105	0.0505151	0.295288	0.0357784	0.256983	0	0	0	0
AT1G09040	NA	5.26437	4.56522	5.21576	0.0486078	0.415798	-0.65054	4.02e-05	853	858	0.00976	0.973
AT1G09050	NA	4.26095	4.21962	4.46287	-0.201917	0.069994	-0.243249	0.0810815	622	689	0.149	0.977
AT1G09060	transcription factor jumonji (jmjC) domain-containing protein	5.82609	5.67028	5.81064	0.0154521	0.420509	-0.140356	0.0761166	6210	6480	0.0617	0.86
AT1G09070	"(AT)SRC2/SRC2 (SOYBEAN GENE REGULATED BY COLD-2); protein binding"	10.574	10.3044	10.5932	-0.0191526	0.444415	-0.288833	0.0779244	33300	49700	0.577	0.143
AT1G09080	"BIP3; ATP binding"	3.7818	3.37693	3.63198	0.149818	0.0803554	-0.255044	0.00695119	89.8	114	0.345	1
AT1G09090	"ATRBOHB (RESPIRATORY BURST OXIDASE HOMOLOG B); FAD binding / calcium ion binding / iron ion binding / oxidoreductase"	3.33625	3.33082	3.30251	0.0337357	0.378104	0.0283135	0.286819	0.326	3.59	3.46	0.672
AT1G09100	"RPT5B (26S PROTEASOME AAA-ATPASE SUBUNIT RPT5B); ATPase/ calmodulin binding"	6.72413	7.2042	6.81588	-0.0917494	0.149974	0.388313	0.0009063	4200	4160	-0.0135	1
AT1G09130	ATP-dependent Clp protease proteolytic subunit, putative	7.55921	7.64846	8.00511	-0.445908	0.00335407	-0.356653	0.00270753	3510	3790	0.112	0.593
AT1G09140	"ATSRP30.1 (ARABIDOPSIS THALIANA SERINE/ARGININE PROTEIN 30.1); RNA binding"	7.61766	7.69112	7.81075	-0.193091	0.0944581	-0.119638	0.110623	4660	5320	0.189	0.291
AT1G09150	pseudouridine synthase and archaeosine transglycosylase (PUA) domain-containing protein	7.64002	7.85546	7.37404	0.265971	0.0107452	0.481414	0.000190467	3700	3560	-0.0558	1
AT1G09155	"ATPP2-B15 (Phloem protein 2-B15); carbohydrate binding"	3.62721	4.49641	3.43082	0.196395	0.021808	1.06559	1.04e-05	75.8	84.2	0.152	1
AT1G09157	NA	4.56365	4.39817	4.35861	0.205048	0.28892	0.0395667	0.324021	30.3	45.7	0.594	0.792
AT1G09160	protein phosphatase 2C-related / PP2C-related	5.89115	6.47317	5.74905	0.142092	0.0508697	0.724116	9.86e-05	5570	4590	-0.281	0.0131
AT1G09170	kinesin motor protein-related	3.17545	3.18894	3.23068	-0.0552308	0.283962	-0.0417412	0.241644	0.242	2.26	3.22	0.905
AT1G09176	unknown protein	4.14415	3.97951	4.1811	-0.036949	0.376902	-0.201585	0.0484495	2.35	4.52	0.945	1
AT1G09180	"ATSAR1/ATSARA1A (ARABIDOPSIS THALIANA SECRETION-ASSOCIATED RAS SUPER FAMILY 1); GTP binding"	6.12112	5.95993	6.21305	-0.0919313	0.152532	-0.253122	0.00542836	128	116	-0.139	1
AT1G09190	pentatricopeptide (PPR) repeat-containing protein	4.44015	4.7897	4.33191	0.10824	0.165318	0.457785	0.00103936	391	326	-0.261	0.417
AT1G09195	NA	4.55998	4.00489	4.42124	0.138746	0.168614	-0.416343	0.00282559	424	532	0.327	0.171
AT1G09200	histone H3	8.25093	10.1916	7.60039	0.650536	0.00599635	2.59118	4.26e-07	16300	14600	-0.151	0.745
AT1G09210	calreticulin 2 (CRT2)	7.1419	8.25109	6.9553	0.186594	0.0505136	1.29579	1.06e-05	47000	39400	-0.254	0.0126
AT1G09220	pentatricopeptide (PPR) repeat-containing protein	4.14984	4.18023	4.05136	0.0984781	0.200029	0.128866	0.117208	154	137	-0.174	0.821
AT1G09230	RNA recognition motif (RRM)-containing protein	5.81268	5.45124	5.95529	-0.142608	0.112121	-0.504049	0.000441447	1060	1010	-0.0671	0.971
AT1G09240	nicotianamine synthase, putative	3.90885	3.83679	4.23497	-0.326121	0.0190199	-0.398185	0.0038171	2.19	0	0	0.907
AT1G09245	NA	3.32865	3.08275	2.94978	0.37887	0.0385695	0.132966	0.172624	0	0	0	0
AT1G09250	transcription factor	6.32088	5.81119	6.41979	-0.0989174	0.221559	-0.608607	0.000226168	450	405	-0.152	1
AT1G09260	DNAJ heat shock N-terminal domain-containing protein	2.84967	3.0009	3.04309	-0.193425	0.19406	-0.0421963	0.295572	0	0	0	0
AT1G09270	importin alpha-1 subunit, putative (IMPA4)	6.74414	6.9402	6.92304	-0.178896	0.0442597	0.0171605	0.305917	5570	5270	-0.0794	0.759
AT1G09280	NA	6.5565	5.78112	6.21608	0.340423	0.00652247	-0.434959	0.0012218	1310	1330	0.0133	1
AT1G09290	NA	6.23398	6.09039	5.68397	0.550012	0.00096976	0.406422	0.000925532	989	889	-0.154	0.691
AT1G09300	metallopeptidase M24 family protein	4.99873	5.42937	4.62318	0.37555	0.022918	0.806184	0.000250353	856	691	-0.309	0.0401
AT1G09310	NA	7.12873	7.68757	9.10897	-1.98024	0.000104797	-1.4214	4.25e-07	604	332	-0.864	0.000639
AT1G09320	agenet domain-containing protein	5.60847	5.18894	5.27503	0.333441	0.00700423	-0.0860901	0.141124	1040	927	-0.167	0.374
AT1G09330	NA	8.14628	8.57728	8.1585	-0.0122229	0.433142	0.418775	0.000286348	4100	3520	-0.218	0.169
AT1G09340	"CRB; binding / catalytic/ coenzyme binding"	5.64607	5.8914	5.65467	-0.00859501	0.455248	0.236733	0.0147545	1420	1800	0.34	0.213
AT1G09350	"ATGOLS3 (ARABIDOPSIS THALIANA GALACTINOL SYNTHASE 3); transferase, transferring glycosyl groups / transferase, transferring hexosyl groups"	3.64598	3.7553	3.76397	-0.117993	0.152112	-0.00866924	0.33724	1.21	3.89	1.68	0.953
AT1G09360	invertase/pectin methylesterase inhibitor family protein	3.31583	3.7724	3.36993	-0.0540908	0.313029	0.402473	0.00715305	0	0	0	0
AT1G09370	enzyme inhibitor/ pectinesterase	8.84779	9.59204	8.85747	-0.00968428	0.452523	0.734564	0.000128283	1310	409	-1.68	9.5e-40
AT1G09380	integral membrane family protein / nodulin MtN21-related	6.23681	4.83063	8.16708	-1.93027	0.000120917	-3.33645	4.98e-08	2.28	120	5.72	3.28e-09
AT1G09390	GDSL-motif lipase/hydrolase family protein	7.8234	6.49077	8.19534	-0.371936	0.00218822	-1.70457	4.24e-07	2050	2470	0.273	0.0986
AT1G09400	12-oxophytodienoate reductase, putative	3.61881	3.56893	3.71288	-0.0940725	0.153269	-0.143952	0.0334592	37.4	64	0.774	0.326
AT1G09410	pentatricopeptide (PPR) repeat-containing protein	3.61415	3.67369	3.55945	0.0546937	0.30975	0.114235	0.0994825	158	145	-0.121	0.859
AT1G09415	NIMIN-3 (NIM1-INTERACTING 3)	5.63677	4.55629	6.39917	-0.762405	0.000333913	-1.84288	4.92e-07	23.3	43.1	0.886	0.281
AT1G09420	"G6PD4 (GLUCOSE-6-PHOSPHATE DEHYDROGENASE 4); glucose-6-phosphate dehydrogenase"	5.71256	5.4643	5.5851	0.12746	0.142563	-0.120802	0.100374	201	243	0.273	0.415
AT1G09421	other RNA	4.15526	3.89739	4.16996	-0.0146913	0.452367	-0.272569	0.0392906	0.326	0.802	1.3	1
AT1G09430	ACLA-3 (ATP-citrate lyase A-3)	6.19949	6.03058	6.23788	-0.0383953	0.336569	-0.207308	0.0143072	2460	2810	0.192	0.178
AT1G09440	protein kinase family protein	5.37816	6.01442	4.55013	0.828028	0.000771714	1.46429	1.61e-06	3270	3230	-0.0157	1
AT1G09450	haspin-related	4.17352	4.41782	3.96182	0.211701	0.0508316	0.456009	0.0033362	1050	959	-0.138	0.789
AT1G09460	glucan endo-1,3-beta-glucosidase-related	5.909	5.99445	5.50683	0.402167	0.0393739	0.487617	0.00397764	1020	1080	0.0735	1
AT1G09470	NA	4.39616	5.34509	3.68886	0.707297	0.00112085	1.65622	2.58e-06	2140	1870	-0.195	0.209
AT1G09480	cinnamyl-alcohol dehydrogenase family / CAD family	4.20926	4.2398	4.91615	-0.706885	0.00519841	-0.676347	0.00251314	292	197	-0.573	0.0282
AT1G09483	NA	3.58947	3.34234	3.29838	0.291087	0.0438928	0.0439538	0.269437	0.651	0.315	-1.05	1
AT1G09490	cinnamyl-alcohol dehydrogenase family / CAD family	6.99387	5.9561	7.64318	-0.649302	0.000233441	-1.68708	2.65e-06	1420	1390	-0.0256	1
AT1G09500	cinnamyl-alcohol dehydrogenase family / CAD family	6.74209	4.1893	7.95038	-1.20829	0.00216915	-3.76108	5.2e-07	3.73	229	5.94	1.65e-44
AT1G09510	cinnamyl-alcohol dehydrogenase family / CAD family	4.64204	6.35279	4.40149	0.240547	0.126082	1.9513	6.91e-06	130	33.2	-1.98	0.000142
AT1G09520	NA	7.62484	7.01599	7.23658	0.388258	0.0078829	-0.220597	0.0276364	952	918	-0.0525	1
AT1G09530	"PAP3/PIF3/POC1 (PHYTOCHROME INTERACTING FACTOR 3); DNA binding / protein binding / transcription factor/ transcription regulator"	5.49244	4.80931	5.52419	-0.0317487	0.371727	-0.714882	9.35e-06	188	242	0.367	0.439
AT1G09540	"ATMYB61/MYB61 (MYB DOMAIN PROTEIN 61); DNA binding / transcription factor"	7.12443	6.62942	7.66556	-0.541131	0.0007702	-1.03614	3.02e-06	3680	4190	0.187	0.142
AT1G09550	pectinacetylesterase, putative	3.6214	5.50942	3.62167	-0.000272618	0.473682	1.88775	2.4e-05	261	8.23	-4.99	9.25e-51
AT1G09560	"GLP5 (GERMIN-LIKE PROTEIN 5); manganese ion binding / metal ion binding / nutrient reservoir"	8.52684	8.53422	9.17042	-0.643585	0.000344217	-0.636203	1.96e-05	4170	4310	0.0479	1
AT1G09570	"PHYA (PHYTOCHROME A); G-protein coupled photoreceptor/ signal transducer"	7.15559	5.9653	6.99178	0.163807	0.0415135	-1.02649	2.06e-06	7480	7990	0.0947	0.591
AT1G09575	NA	5.77115	5.76905	5.61346	0.157694	0.0497987	0.155593	0.128812	736	949	0.367	0.045
AT1G09580	emp24/gp25L/p24 family protein	5.46057	6.30938	5.01568	0.444893	0.00760727	1.29371	1.17e-05	1440	1370	-0.0707	0.918
AT1G09590	60S ribosomal protein L21 (RPL21A)	6.08093	6.40306	5.91452	0.166405	0.203867	0.488538	0.00147867	23000	17700	-0.375	0.00364
AT1G09600	protein kinase family protein	3.81358	4.01009	3.75357	0.0600119	0.295785	0.256513	0.0160217	291	249	-0.224	0.727
AT1G09610	NA	3.70123	4.58254	3.82529	-0.124059	0.148287	0.757255	0.000172455	371	357	-0.0553	1
AT1G09620	ATP binding / aminoacyl-tRNA ligase	6.65906	6.69174	6.33082	0.328243	0.00902159	0.360922	0.00419869	13400	12000	-0.162	0.0875
AT1G09625	unknown protein	3.40862	3.41189	3.29164	0.116982	0.118756	0.120249	0.108202	0	0	0	0
AT1G09630	"ATRAB11C (ARABIDOPSIS RAB GTPASE HOMOLOG A2A); GTP binding"	7.05856	7.72342	7.10417	-0.0456092	0.363921	0.619248	0.000116331	2670	2490	-0.101	0.908
AT1G09640	elongation factor 1B-gamma, putative / eEF-1B gamma, putative	8.96774	9.21974	8.47271	0.495027	0.000807846	0.747029	0.000115349	20300	15800	-0.365	7.44e-05
AT1G09645	NA	7.49998	7.41439	7.63607	-0.136092	0.0999046	-0.221674	0.0128809	1580	1570	-0.00475	1
AT1G09650	F-box family protein	6.05491	5.42969	5.28411	0.770803	0.000545805	0.145581	0.12458	216	260	0.264	0.619
AT1G09660	KH domain-containing quaking protein, putative	7.56846	7.82316	7.32881	0.239646	0.0229043	0.494352	0.00020744	2940	2560	-0.199	0.213
AT1G09665	Toll-Interleukin-Resistance (TIR) domain-containing protein	3.56477	3.58689	3.52942	0.0353489	0.36003	0.0574704	0.263307	0	0	0	0
AT1G09680	pentatricopeptide (PPR) repeat-containing protein	4.22146	4.36798	4.19372	0.0277414	0.404966	0.174254	0.0324721	222	216	-0.0448	1
AT1G09690	60S ribosomal protein L21 (RPL21C)	9.49099	9.83805	9.09828	0.392708	0.0136168	0.739769	0.000215326	34900	29800	-0.225	0.034
AT1G09700	HYL1 (HYPONASTIC LEAVES 1)	5.80774	6.0327	5.38653	0.421211	0.0124158	0.646173	0.000758345	2120	1870	-0.179	0.159
AT1G09710	DNA binding	5.24558	4.99166	4.96982	0.275757	0.017107	0.0218364	0.301064	805	902	0.164	0.856
AT1G09720	kinase interacting family protein	3.36342	3.39553	3.43659	-0.0731724	0.212861	-0.0410602	0.235263	7.38	13.1	0.824	0.815
AT1G09730	Ulp1 protease family protein	5.4273	5.03555	5.45947	-0.0321716	0.358641	-0.42392	0.000271771	4490	4540	0.0181	1
AT1G09740	ethylene-responsive protein, putative	5.26121	4.14122	6.21853	-0.957315	0.000178303	-2.07731	4.42e-07	37.5	41.8	0.156	0.807
AT1G09750	chloroplast nucleoid DNA-binding protein-related	7.90658	5.92265	6.10132	1.80526	3.83e-05	-0.178665	0.0659663	2020	2150	0.0914	1
AT1G09760	"U2A' (U2 small nuclear ribonucleoprotein A); protein binding"	6.41257	6.80137	6.12613	0.286438	0.018822	0.675237	3.62e-05	4540	4030	-0.173	0.379
AT1G09770	"ATCDC5 (ARABIDOPSIS THALIANA HOMOLOG OF CDC5); DNA binding / transcription factor"	6.06059	5.81967	5.97793	0.0826577	0.20584	-0.158259	0.0358098	12000	12300	0.0364	1
AT1G09780	2,3-biphosphoglycerate-independent phosphoglycerate mutase, putative / phosphoglyceromutase, putative	6.64644	8.04095	6.76014	-0.113703	0.163501	1.28081	5.36e-06	14900	13400	-0.148	0.231
AT1G09790	COBL6 (COBRA-LIKE PROTEIN 6 PRECURSOR)	7.8367	8.3592	8.54893	-0.712231	0.00235848	-0.189737	0.0228634	4950	3540	-0.483	0.00196
AT1G09795	"ATATP-PRT2 (ATP PHOSPHORIBOSYL TRANSFERASE 2); ATP phosphoribosyltransferase"	6.29184	6.4886	6.32804	-0.0361977	0.376154	0.160561	0.0584692	3320	3390	0.0269	0.977
AT1G09800	tRNA pseudouridine synthase family protein	5.11326	5.47043	4.64121	0.472049	0.00230639	0.829217	2.82e-05	673	585	-0.202	0.38
AT1G09810	ECT11 (evolutionarily conserved C-terminal region 11)	5.11024	5.17371	5.08934	0.0208964	0.403486	0.0843676	0.114595	1280	1100	-0.213	0.155
AT1G09812	NA	5.40482	5.24984	4.60054	0.804276	0.0090536	0.649298	0.00082411	14.3	15.6	0.127	0.992
AT1G09815	"POLD4; delta DNA polymerase"	8.40961	8.59984	8.32267	0.0869366	0.211153	0.277172	0.00662778	1490	1570	0.0778	0.859
AT1G09820	pentatricopeptide (PPR) repeat-containing protein	4.92744	4.88573	4.73793	0.189507	0.0534677	0.147804	0.0636566	857	911	0.0888	0.805
AT1G09830	phosphoribosylamine--glycine ligase (PUR2)	5.34865	6.09414	5.11906	0.229594	0.0294118	0.975083	9.2e-06	2360	1870	-0.339	0.0027
AT1G09840	shaggy-related protein kinase kappa / ASK-kappa (ASK10)	6.51033	6.59964	6.25469	0.255638	0.018657	0.344949	0.000800983	3610	3500	-0.0415	0.99
AT1G09850	"XBCP3 (XYLEM BARK CYSTEINE PEPTIDASE 3); cysteine-type peptidase"	5.36132	5.60039	5.59792	-0.236598	0.0221655	0.00247407	0.349019	575	641	0.158	0.775
AT1G09860	"ATPUP16 (Arabidopsis thaliana purine permease 16); purine transmembrane transporter"	4.05061	4.33642	4.0706	-0.0199896	0.427761	0.265823	0.0107031	15.3	19.5	0.349	0.783
AT1G09870	histidine acid phosphatase family protein	6.98486	7.29158	7.12663	-0.141769	0.0810231	0.164948	0.0357424	4540	4470	-0.0227	0.941
AT1G09880	lyase	4.23583	4.41192	4.29096	-0.0551329	0.286551	0.120961	0.0957135	309	153	-1.02	0.000113
AT1G09890	lyase	3.61399	3.71734	3.5382	0.0757929	0.235911	0.179147	0.0241666	14.3	19.3	0.436	1
AT1G09900	pentatricopeptide (PPR) repeat-containing protein	4.89954	5.1085	4.61932	0.280216	0.0151985	0.489181	0.00031966	767	659	-0.218	0.647
AT1G09910	lyase	6.11267	5.29316	5.92609	0.186583	0.0581118	-0.632927	5.34e-05	2010	2480	0.306	0.028
AT1G09920	TRAF-type zinc finger-related	6.82525	6.68457	7.00172	-0.176471	0.0377425	-0.317158	0.00253776	1890	2030	0.106	0.724
AT1G09930	"ATOPT2 (oligopeptide transporter 2); oligopeptide transporter"	4.01804	4.02942	4.01014	0.00790649	0.45188	0.0192831	0.312384	370	303	-0.285	0.464
AT1G09932	phosphoglycerate/bisphosphoglycerate mutase-related	3.13861	3.19819	3.04726	0.0913434	0.13964	0.15093	0.0364044	28.3	49	0.79	0.732
AT1G09935	phosphoglycerate/bisphosphoglycerate mutase family protein	3.28053	3.4695	3.49181	-0.211285	0.0390722	-0.022314	0.316076	0	0	0	0
AT1G09940	"HEMA2; glutamyl-tRNA reductase"	4.78859	4.72156	5.06291	-0.274318	0.044141	-0.341353	0.0088702	1200	1670	0.472	0.54
AT1G09950	transcription factor-related	4.03551	3.85598	4.11084	-0.0753284	0.34993	-0.254857	0.0527974	75.1	96.9	0.367	0.985
AT1G09960	"SUT4 (SUCROSE TRANSPORTER 4); carbohydrate transmembrane transporter/ sucrose transmembrane transporter/ sucrose:hydrogen symporter/ sugar:hydrogen ion symporter"	6.10547	6.21266	6.28819	-0.182724	0.0427292	-0.0755347	0.159028	1190	1420	0.253	0.224
AT1G09970	leucine-rich repeat transmembrane protein kinase, putative	6.84221	5.17396	7.2877	-0.445488	0.00829264	-2.11374	8.94e-08	3170	3550	0.165	0.966
AT1G09980	NA	4.8435	4.84264	5.00947	-0.165969	0.058375	-0.166831	0.0406007	4130	4000	-0.0446	1
AT1G09995	NA	3.19512	3.38171	3.19206	0.0030542	0.471257	0.189642	0.129151	238	213	-0.16	0.95
AT1G10000	nucleic acid binding / ribonuclease H	3.87682	4.06793	3.80042	0.0764	0.273023	0.26751	0.00843423	37.9	46.5	0.293	0.755
AT1G10010	"AAP8 (amino acid permease 8); amino acid transmembrane transporter"	5.91922	5.99151	5.60955	0.309669	0.00368311	0.381958	0.00508863	942	564	-0.738	0.0162
AT1G10020	NA	6.73402	6.80676	6.83562	-0.101597	0.254324	-0.0288603	0.281635	4390	3730	-0.235	0.0937
AT1G10030	ERG28 (ARABIDOPSIS HOMOLOG OF YEAST ERGOSTEROL28)	7.16611	8.11512	6.80302	0.363087	0.00303087	1.3121	9.13e-07	1900	1650	-0.199	0.496
AT1G10040	NA	4.26046	4.066	4.53915	-0.278686	0.0174412	-0.473149	0.000822593	246	238	-0.0448	1
AT1G10050	glycosyl hydrolase family 10 protein / carbohydrate-binding domain-containing protein	4.05731	4.00074	4.15321	-0.0958908	0.168563	-0.152465	0.0348257	528	663	0.329	0.156
AT1G10060	"ATBCAT-1; branched-chain-amino-acid transaminase/ catalytic"	5.22521	5.03017	6.34478	-1.11957	0.00108263	-1.31461	1.89e-05	188	140	-0.424	0.67
AT1G10070	"ATBCAT-2; branched-chain-amino-acid transaminase/ catalytic"	4.45657	3.80375	4.81417	-0.357598	0.00613299	-1.01042	7.89e-06	13.3	10.1	-0.404	0.958
AT1G10090	NA	4.04809	3.94013	4.06328	-0.0151935	0.423865	-0.123155	0.0649175	187	270	0.53	0.627
AT1G10095	protein prenyltransferase	4.54127	4.1426	4.45368	0.0875831	0.223068	-0.311087	0.00432919	359	350	-0.0375	1
AT1G10100	unknown protein	4.18814	4.45082	4.30288	-0.114737	0.264417	0.147942	0.119424	0	0.315	0	1
AT1G10110	F-box family protein	6.54802	6.46303	6.58397	-0.035954	0.348697	-0.12094	0.0544768	128	105	-0.289	0.722
AT1G10120	DNA binding / transcription factor	5.67966	5.72308	5.45743	0.222232	0.0461519	0.265653	0.0170396	4280	3870	-0.145	0.438
AT1G10130	"ECA3 (ENDOPLASMIC RETICULUM-TYPE CALCIUM-TRANSPORTING ATPASE 3); calcium-transporting ATPase/ calmodulin binding"	5.26975	5.17743	5.16562	0.104128	0.121265	0.0118143	0.321346	5030	4930	-0.0288	0.844
AT1G10140	NA	8.73515	5.99788	9.00491	-0.26976	0.0103061	-3.00703	8.01e-08	119	145	0.285	0.747
AT1G10150	"ATPP2-A10 (Phloem protein 2-A10); carbohydrate binding"	7.06294	6.61092	7.46664	-0.403696	0.00502072	-0.855721	6.59e-06	1390	1500	0.114	0.741
AT1G10155	NA	3.32485	3.5572	3.3704	-0.0455452	0.361157	0.186803	0.0391394	7.23	9.23	0.354	1
AT1G10160	transposable element gene	4.3113	4.29973	4.24066	0.0706366	0.221462	0.0590666	0.215535	1300	1240	-0.0606	1
AT1G10170	"ATNFXL1; transcription factor"	5.99559	5.50991	6.07126	-0.0756663	0.242011	-0.561345	0.000122499	4240	4550	0.103	0.985
AT1G10180	NA	6.06756	6.11503	5.95411	0.113443	0.107379	0.160922	0.0250843	3990	4170	0.0636	0.882
AT1G10190	NA	4.63833	6.08361	4.17921	0.45912	0.0565881	1.90439	2.51e-05	143	2.69	-5.73	1.81e-31
AT1G10200	"WLIM1; transcription factor"	7.42963	7.46864	7.68638	-0.256746	0.0127697	-0.217741	0.0110206	7100	5970	-0.249	0.0188
AT1G10210	"ATMPK1 (MITOGEN-ACTIVATED PROTEIN KINASE 1); MAP kinase/ kinase"	6.58747	5.45802	6.15909	0.428375	0.0139556	-0.701072	0.000289143	505	577	0.194	0.515
AT1G10220	NA	4.3715	4.45318	4.35977	0.0117253	0.46025	0.093411	0.250734	0.568	2.92	2.36	0.9
AT1G10230	"ASK18 (ARABIDOPSIS SKP1-LIKE 18); protein binding / ubiquitin-protein ligase"	7.81084	8.7882	7.33728	0.473557	0.00554016	1.45091	2.55e-06	2650	2360	-0.167	0.388
AT1G10240	"FRS11 (FAR1-RELATED SEQUENCE 11); zinc ion binding"	5.66921	5.46338	5.45288	0.216323	0.0143979	0.0104974	0.332447	1080	1160	0.109	1
AT1G10270	"GRP23 (GLUTAMINE-RICH PROTEIN23); binding"	5.51017	6.28332	5.12421	0.385962	0.00412111	1.15912	2.85e-06	2580	2030	-0.346	0.0696
AT1G10280	NA	4.84882	5.16712	4.82998	0.018842	0.407196	0.337142	0.00192688	1050	1070	0.0269	1
AT1G10290	ADL6 (DYNAMIN-LIKE PROTEIN 6)	5.93042	6.05293	6.0606	-0.13018	0.0983989	-0.00766853	0.339955	9240	9000	-0.038	0.911
AT1G10300	GTP-binding protein-related	4.42333	4.48859	4.24261	0.180725	0.0519085	0.245981	0.0114896	478	368	-0.376	0.0581
AT1G10310	short-chain dehydrogenase/reductase (SDR) family protein	6.9434	7.04065	7.0931	-0.1497	0.0864837	-0.0524558	0.203347	1290	1410	0.136	0.588
AT1G10320	U2 snRNP auxiliary factor-related	4.91165	4.57451	5.00236	-0.0907034	0.202829	-0.427847	0.000199617	1340	1440	0.112	0.756
AT1G10330	pentatricopeptide (PPR) repeat-containing protein	4.88555	5.00803	4.52208	0.363464	0.00532541	0.485946	0.000114346	172	199	0.216	0.778
AT1G10340	ankyrin repeat family protein	3.95038	4.02847	4.20055	-0.250168	0.0199554	-0.172079	0.0259692	4.46	3.93	-0.185	1
AT1G10350	DNAJ heat shock protein, putative	6.50536	6.56008	6.2578	0.247561	0.0560968	0.302279	0.0160143	1310	1480	0.176	0.36
AT1G10360	"ATGSTU18 (GLUTATHIONE S-TRANSFERASE 29); glutathione transferase"	5.24139	5.05472	4.8422	0.399193	0.00945086	0.21252	0.0478366	11.5	76.5	2.73	6.03e-06
AT1G10370	"ATGSTU17/ERD9/GST30/GST30B (EARLY-RESPONSIVE TO DEHYDRATION 9); glutathione transferase"	5.00746	8.05197	5.61634	-0.608882	0.00739722	2.43563	2.99e-07	178	330	0.893	0.173
AT1G10380	NA	5.53764	5.46368	5.37132	0.166316	0.107399	0.0923565	0.126026	104	131	0.325	0.82
AT1G10385	NA	3.77189	3.87077	3.79042	-0.0185282	0.428924	0.0803511	0.164304	5.35	5.59	0.0625	1
AT1G10390	nucleoporin family protein	6.22086	6.03919	6.29794	-0.0770847	0.195479	-0.25875	0.00242892	10500	10600	0.00835	1
AT1G10400	UDP-glycosyltransferase/ transferase, transferring glycosyl groups	3.93258	3.86298	3.99007	-0.057486	0.347936	-0.127095	0.150618	22.6	24.5	0.121	1
AT1G10410	NA	6.94344	6.47799	7.86601	-0.922571	0.000385634	-1.38803	3.87e-06	4870	3820	-0.349	0.00336
AT1G10417	NA	3.36405	3.60243	3.35447	0.00957671	0.448795	0.247955	0.0176947	133	122	-0.129	0.978
AT1G10430	"PP2A-2 (protein phosphatase 2a-2); protein serine/threonine phosphatase"	7.31591	7.27659	7.03323	0.282682	0.00726354	0.243359	0.00906312	1970	1940	-0.0258	1
AT1G10450	paired amphipathic helix repeat-containing protein	4.65395	4.55625	4.68819	-0.0342452	0.374196	-0.13194	0.0709841	4230	3970	-0.0904	0.51
AT1G10455	NA	3.19476	2.97734	3.56654	-0.371782	0.0166792	-0.589206	0.000940735	1.29	1.98	0.611	1
AT1G10460	"GLP7 (GERMIN-LIKE PROTEIN 7); manganese ion binding / metal ion binding / nutrient reservoir"	4.61079	4.66253	4.54696	0.0638347	0.307196	0.11557	0.107516	12.2	1.19	-3.36	0.461
AT1G10470	"ARR4 (RESPONSE REGULATOR 4); transcription regulator/ two-component response regulator"	6.38939	5.11027	6.43196	-0.0425678	0.32297	-1.32169	2.53e-05	125	118	-0.0855	0.957
AT1G10480	"ZFP5 (ZINC FINGER PROTEIN 5); nucleic acid binding / transcription factor/ zinc ion binding"	3.33668	3.36996	3.39457	-0.0578911	0.323994	-0.0246053	0.303901	0.727	1.16	0.677	1
AT1G10490	NA	4.60535	4.73274	4.41246	0.192888	0.0631889	0.32028	0.00612703	2960	1750	-0.759	1.54e-10
AT1G10500	"ATCPISCA (CHLOROPLAST-LOCALIZED ISCA-LIKE PROTEIN); structural molecule"	8.11016	7.56433	8.71208	-0.60192	0.000480639	-1.14775	2.62e-06	1620	1650	0.0322	0.893
AT1G10510	"EMB2004 (EMBRYO DEFECTIVE 2004); protein binding"	5.22611	5.33335	5.14706	0.0790412	0.212339	0.186282	0.0122922	1920	1690	-0.181	0.226
AT1G10520	DNA polymerase lambda (POLL)	3.77414	3.69236	3.65643	0.117704	0.0929427	0.0359236	0.236483	78.3	96.7	0.305	0.6
AT1G10522	NA	6.06166	6.60063	5.42883	0.632832	0.00063184	1.1718	1.88e-06	454	345	-0.395	0.0573
AT1G10530	NA	3.90336	4.39612	4.02304	-0.119675	0.236203	0.373082	0.00724264	240	233	-0.0448	1
AT1G10540	xanthine/uracil permease family protein	8.74213	8.53509	8.76204	-0.0199151	0.4355	-0.226955	0.0046922	27100	29000	0.0998	0.59
AT1G10550	"XTH33 (xyloglucan:xyloglucosyl transferase 33); hydrolase, acting on glycosyl bonds"	5.84309	6.65532	5.63788	0.20521	0.0909219	1.01745	9.2e-06	1520	972	-0.649	0.00117
AT1G10560	armadillo/beta-catenin repeat family protein / U-box domain-containing protein	4.19605	4.2047	4.15582	0.0402224	0.346843	0.0488717	0.257779	475	831	0.806	0.00236
AT1G10570	Ulp1 protease family protein	6.17027	5.67651	6.07182	0.0984517	0.22063	-0.395312	0.000581765	2960	3170	0.099	0.606
AT1G10580	transducin family protein / WD-40 repeat family protein	6.42614	6.77682	6.43612	-0.00997895	0.45061	0.340699	0.00599783	3790	3540	-0.0978	0.55
AT1G10585	transcription factor	3.52275	3.18229	3.56438	-0.0416281	0.374094	-0.382085	0.00552756	0.568	2.9	2.35	0.901
AT1G10586	transcription regulator	3.5084	3.943	3.83782	-0.329417	0.11118	0.105184	0.106123	0	0	0	0
AT1G10588	NA	4.14853	3.45551	4.11141	0.037117	0.380943	-0.655906	0.000103666	26.5	93.2	1.81	0.00109
AT1G10590	DNA-binding protein-related	10.0126	9.92	9.59217	0.420452	0.00201569	0.327833	0.00139049	5300	4930	-0.104	0.657
AT1G10600	NA	6.3065	5.78231	5.99379	0.312713	0.0137084	-0.211475	0.0398767	683	788	0.208	0.357
AT1G10610	DNA binding / transcription factor	4.64057	3.83458	4.28304	0.357534	0.0103071	-0.448462	0.00112959	199	229	0.207	0.514
AT1G10620	protein kinase family protein	3.69928	3.84504	3.77515	-0.0758771	0.191841	0.0698819	0.144281	0.81	7.74	3.25	0.36
AT1G10630	"ATARFA1F; GTP binding / phospholipase activator/ protein binding"	7.78525	8.57297	7.8143	-0.0290464	0.375291	0.758674	7.81e-06	9210	9200	-0.000565	1
AT1G10640	polygalacturonase, putative / pectinase, putative	6.68689	9.09594	5.54022	1.14668	0.000272321	3.55572	2.28e-07	12300	17000	0.459	6.58e-05
AT1G10650	protein binding / zinc ion binding	6.30563	6.43715	6.26474	0.0408974	0.358309	0.172413	0.0393097	1730	1620	-0.0974	0.849
AT1G10652	unknown protein	3.93468	4.71258	3.87573	0.0589525	0.440167	0.836858	0.0446548	0	0	0	0
AT1G10657	NA	4.30969	3.75767	4.4917	-0.182007	0.115774	-0.734027	0.000340416	37	44.6	0.27	0.812
AT1G10660	NA	6.98585	6.07434	6.65653	0.329315	0.00520198	-0.582194	0.000115861	1560	1570	0.011	1
AT1G10670	ACLA-1 (ATP-citrate lyase A-1)	7.91765	8.58276	8.31279	-0.395136	0.00478674	0.269972	0.0170511	29400	28700	-0.0354	0.954
AT1G10680	"PGP10 (P-GLYCOPROTEIN 10); ATPase, coupled to transmembrane movement of substances"	3.96167	4.46912	4.03249	-0.0708173	0.249544	0.43663	0.000816759	587	44.2	-3.73	2.83e-41
AT1G10682	other RNA	8.26363	5.52621	7.90552	0.358111	0.00567427	-2.3793	1.35e-07	78	101	0.368	0.982
AT1G10690	NA	6.29847	4.47831	7.50997	-1.2115	9.67e-05	-3.03167	6.11e-08	29.6	43.6	0.561	0.948
AT1G10700	ribose-phosphate pyrophosphokinase 3 / phosphoribosyl diphosphate synthetase 3 (PRS3)	5.48906	5.78073	5.18261	0.306443	0.0283164	0.598118	0.000506898	870	812	-0.1	0.891
AT1G10710	NA	3.45907	3.54223	3.39551	0.0635581	0.297274	0.146722	0.105253	77.5	62.2	-0.317	0.917
AT1G10717	NA	5.08676	5.52315	5.03801	0.0487564	0.41325	0.485141	0.0314949	3.49	21.7	2.63	0.15
AT1G10720	BSD domain-containing protein	6.39065	6.25114	6.68771	-0.297062	0.0118	-0.436572	0.00029463	2020	1910	-0.0822	0.879
AT1G10730	clathrin adaptor complexes medium subunit family protein	5.05394	5.04219	5.02155	0.0323928	0.403768	0.0206376	0.304271	1040	1040	0.0106	0.993
AT1G10740	NA	6.58606	5.75227	6.86018	-0.274124	0.00885305	-1.10791	2.62e-06	1820	2130	0.224	0.105
AT1G10745	NA	5.19147	6.81019	4.65877	0.532694	0.00438481	2.15142	3.46e-06	234	35.7	-2.71	3.2e-21
AT1G10747	NA	3.47823	3.64594	3.4797	-0.00146434	0.470798	0.166243	0.10287	0.242	0	0	1
AT1G10750	NA	4.28373	4.09067	4.17973	0.103993	0.198079	-0.0890641	0.132256	263	266	0.0164	1
AT1G10760	SEX1 (STARCH EXCESS 1)	5.19187	5.27864	5.04364	0.148229	0.0729592	0.235007	0.00651472	13700	14300	0.0538	1
AT1G10770	invertase/pectin methylesterase inhibitor family protein	4.26554	5.89026	4.04509	0.22045	0.217882	1.84517	0.000995992	87	88	0.0165	1
AT1G10780	F-box family protein	4.97368	6.03533	4.42824	0.545442	0.000746747	1.60709	1.5e-06	1060	901	-0.234	0.321
AT1G10790	NA	3.95215	5.36692	3.77615	0.175997	0.0592843	1.59077	1.54e-06	129	133	0.0368	1
AT1G10800	NA	4.2456	4.07782	4.28751	-0.0419063	0.337045	-0.209684	0.0194841	0	0.291	0	1
AT1G10810	aldo/keto reductase family protein	3.59948	3.63261	3.52609	0.0733872	0.227102	0.106514	0.102655	102	117	0.208	0.738
AT1G10820	NA	6.43102	6.75018	6.03203	0.398992	0.0125986	0.718149	3.91e-05	2410	2470	0.0331	1
AT1G10830	sodium symporter-related	6.40146	6.93126	6.59096	-0.189495	0.0293019	0.340309	0.00103925	1090	1130	0.0505	0.984
AT1G10840	"TIF3H1 (EUKARYOTIC TRANSLATION INITIATION FACTOR 3 SUBUNIT H1); translation initiation factor"	7.47055	7.60022	7.09317	0.377387	0.00265096	0.507058	9.91e-05	12000	10100	-0.249	0.0122
AT1G10850	ATP binding / protein serine/threonine kinase	5.84033	7.05401	5.77038	0.0699457	0.224065	1.28363	6.59e-07	13200	12600	-0.0657	0.957
AT1G10865	NA	7.31639	7.08217	6.78401	0.532376	0.000556838	0.298159	0.00281829	618	612	-0.0132	1
AT1G10870	"AGD4 (ARF-GAP DOMAIN 4); ARF GTPase activator/ protein binding / zinc ion binding"	4.95229	5.1057	4.91137	0.0409211	0.329558	0.194337	0.0135129	3140	3140	0.000133	1
AT1G10880	NA	3.59078	3.62175	3.61272	-0.021944	0.408613	0.0090316	0.337563	0.894	2.57	1.53	0.991
AT1G10890	F-box family protein	6.27158	5.51823	6.287	-0.0154171	0.436442	-0.768762	5.5e-05	1680	1970	0.235	0.107
AT1G10900	phosphatidylinositol-4-phosphate 5-kinase family protein	4.03402	4.27821	4.23763	-0.203604	0.0190162	0.0405887	0.270062	831	687	-0.276	0.143
AT1G10910	NA	5.09301	4.77799	4.78804	0.30497	0.0135374	-0.0100545	0.335758	1270	1330	0.0679	0.846
AT1G10920	"LOV1; ATP binding / protein binding"	5.21386	4.47203	5.26223	-0.0483691	0.312279	-0.790193	9.53e-06	338	421	0.316	0.147
AT1G10930	"ATRECQ4A/ATSGS1/RECQL4A; ATP-dependent helicase"	4.1485	4.32724	4.08809	0.0604022	0.267313	0.239144	0.00567185	3200	2680	-0.258	0.0296
AT1G10940	"ASK1 (ARABIDOPSIS SERINE/THREONINE KINASE 1); kinase"	7.34493	7.05008	7.21722	0.127704	0.134468	-0.167143	0.0366991	4870	5160	0.0829	0.881
AT1G10950	endomembrane protein 70, putative	7.96782	8.20329	7.84108	0.126746	0.095758	0.362209	0.00113233	16900	16200	-0.0624	0.718
AT1G10960	"ATFD1 (FERREDOXIN 1); 2 iron, 2 sulfur cluster binding / electron carrier/ iron-sulfur cluster binding"	8.92751	9.12052	8.76478	0.16273	0.0967687	0.355739	0.00104001	1910	2370	0.313	0.361
AT1G10970	"ZIP4 (ZINC TRANSPORTER 4 PRECURSOR); cation transmembrane transporter"	5.63039	5.9594	5.2556	0.374792	0.0123171	0.703802	0.000185658	887	1120	0.343	0.0323
AT1G10980	NA	4.1217	4.74427	3.8253	0.296406	0.00441196	0.918969	6.03e-06	723	548	-0.4	0.0498
AT1G10990	unknown protein	4.85162	4.13546	5.11295	-0.261325	0.069371	-0.977487	5.98e-05	33.3	16.6	-1	0.493
AT1G11000	"MLO4 (MILDEW RESISTANCE LOCUS O 4); calmodulin binding"	4.02526	3.76667	3.83447	0.190789	0.0498105	-0.0677981	0.17511	344	383	0.155	0.774
AT1G11020	zinc finger (C3HC4-type RING finger) family protein	7.61467	7.40081	7.44337	0.171302	0.0312416	-0.0425532	0.235362	1700	1790	0.0798	0.858
AT1G11040	DNAJ chaperone C-terminal domain-containing protein	3.62023	3.67679	3.67884	-0.0586101	0.301036	-0.00205524	0.351535	0.731	0.802	0.133	1
AT1G11050	protein kinase family protein	5.88172	5.96455	5.70029	0.181424	0.101556	0.264259	0.0669513	2270	2950	0.381	0.216
AT1G11060	NA	5.0848	5.01051	5.17949	-0.0946967	0.170958	-0.168982	0.0166926	2500	2460	-0.0278	0.95
AT1G11070	hydroxyproline-rich glycoprotein family protein	4.12711	4.04134	4.1181	0.0090085	0.444004	-0.0767605	0.124772	253	682	1.43	2.4e-10
AT1G11080	"SCPL31 (serine carboxypeptidase-like 31); serine carboxypeptidase"	5.54321	4.42328	6.03016	-0.486949	0.000882197	-1.60689	2.35e-07	59	26.4	-1.16	0.15
AT1G11090	hydrolase, alpha/beta fold family protein	6.67149	7.00715	7.40879	-0.737297	0.000480678	-0.401636	0.000482226	1230	1250	0.0251	1
AT1G11100	SNF2 domain-containing protein / helicase domain-containing protein / zinc finger protein-related	4.20773	3.89951	4.10381	0.10392	0.124036	-0.204294	0.0111843	408	504	0.304	0.232
AT1G11110	NA	2.97694	2.94568	3.07346	-0.096522	0.161092	-0.127782	0.0543229	0.326	0.256	-0.349	1
AT1G11112	unknown protein	3.63569	3.61105	3.50673	0.128961	0.182854	0.104313	0.171034	7.07	10.8	0.617	1
AT1G11120	NA	5.11078	5.91933	4.72937	0.381408	0.0152775	1.18996	1.21e-05	325	305	-0.0877	0.973
AT1G11130	"SUB (STRUBBELIG); protein binding"	5.4132	5.35599	5.04662	0.366573	0.00444205	0.309364	0.00452377	3220	3200	-0.0117	0.994
AT1G11145	NA	3.3151	3.52271	3.36245	-0.0473487	0.353975	0.160264	0.0731594	0.242	0	0	1
AT1G11150	transposable element gene	3.34465	3.93239	3.35598	-0.0113274	0.445525	0.576411	0.000311368	153	131	-0.224	0.722
AT1G11160	nucleotide binding	3.27601	3.4163	3.23894	0.037075	0.334948	0.177362	0.0160422	424	537	0.34	0.485
AT1G11170	NA	4.45917	3.91485	5.60144	-1.14227	0.000188178	-1.68658	4.99e-06	97.9	111	0.181	0.777
AT1G11175	other RNA	7.22549	4.56608	6.98818	0.237306	0.0220096	-2.42211	3.6e-07	104	214	1.05	0.000211
AT1G11180	secretory carrier membrane protein (SCAMP) family protein	5.41369	4.75281	5.70107	-0.287386	0.0177721	-0.948261	3.95e-06	298	426	0.514	0.126
AT1G11185	other RNA	4.74587	4.1605	4.85333	-0.107465	0.328041	-0.692839	0.00727698	33.7	27.1	-0.316	1
AT1G11190	"BFN1 (BIFUNCTIONAL NUCLEASE I); nucleic acid binding"	8.83137	5.57941	9.82397	-0.992601	0.00127505	-4.24457	1.33e-07	49.9	39.2	-0.347	1
AT1G11200	NA	6.74477	6.8555	7.04637	-0.301601	0.00448868	-0.190874	0.014406	1590	1550	-0.0304	1
AT1G11210	NA	8.15341	5.80855	8.11702	0.0363862	0.413015	-2.30847	1.48e-05	663	1700	1.36	0.121
AT1G11220	NA	4.13688	4.54392	3.97517	0.161708	0.130891	0.568744	0.0015881	399	403	0.0156	1
AT1G11230	NA	3.69234	3.67545	3.5964	0.0959356	0.180264	0.0790433	0.190115	0	0	0	0
AT1G11240	NA	7.49283	7.64141	7.13618	0.356651	0.0119574	0.505232	0.000102347	1810	1650	-0.136	0.415
AT1G11250	"SYP125 (syntaxin 125); SNAP receptor"	3.9736	4.1339	3.8746	0.0989991	0.22096	0.259304	0.0114651	0.727	0.315	-1.21	1
AT1G11260	"STP1 (SUGAR TRANSPORTER 1); carbohydrate transmembrane transporter/ sugar:hydrogen ion symporter"	10.2763	7.54832	10.4149	-0.138523	0.0825257	-2.86653	5.31e-08	1340	2430	0.857	0.095
AT1G11270	F-box family protein	6.52915	6.17085	6.2804	0.248753	0.0133464	-0.109548	0.0745097	272	287	0.079	0.962
AT1G11280	S-locus protein kinase, putative	5.81615	5.72006	5.42997	0.386179	0.00290007	0.290083	0.0046058	2300	2190	-0.0713	0.769
AT1G11290	pentatricopeptide (PPR) repeat-containing protein	4.18786	4.45944	4.11406	0.0737996	0.262842	0.345383	0.00099931	276	291	0.0751	1
AT1G11300	carbohydrate binding / kinase	3.39734	3.72743	3.44733	-0.0499887	0.31513	0.280093	0.00266558	58.3	74.1	0.345	0.887
AT1G11310	"MLO2 (MILDEW RESISTANCE LOCUS O 2); calmodulin binding"	5.69384	4.6317	5.85969	-0.165848	0.064511	-1.22799	1.49e-06	1130	1470	0.384	0.00601
AT1G11320	NA	4.91249	5.19533	4.60428	0.308214	0.0053742	0.591054	0.000128899	412	365	-0.176	0.877
AT1G11330	S-locus lectin protein kinase family protein	4.42881	4.9038	4.41008	0.0187248	0.426801	0.493716	0.000405679	4120	3540	-0.218	0.0434
AT1G11340	S-locus lectin protein kinase family protein	3.40143	3.28555	3.40319	-0.00175508	0.469466	-0.117642	0.075247	2.27	4.96	1.13	0.97
AT1G11350	S-locus lectin protein kinase family protein	3.74752	3.73644	3.77996	-0.0324378	0.375908	-0.043517	0.254636	441	439	-0.00541	1
AT1G11360	universal stress protein (USP) family protein	7.4892	7.45322	7.16576	0.323437	0.00930768	0.287464	0.00652317	2280	2680	0.23	0.0861
AT1G11362	enzyme inhibitor/ pectinesterase	5.6512	3.7218	5.18448	0.466723	0.00775334	-1.46268	8.75e-06	25.2	58.6	1.22	0.0752
AT1G11370	pectinesterase family protein	4.95806	4.00626	4.40748	0.550583	0.00476176	-0.401221	0.00322703	164	214	0.382	0.3
AT1G11380	NA	7.21036	6.29448	7.01813	0.192235	0.0387256	-0.723651	1.61e-05	533	530	-0.00841	1
AT1G11390	ABC1 family protein	4.99185	5.04644	4.97364	0.0182154	0.430068	0.0728079	0.172212	1190	1080	-0.145	0.563
AT1G11400	"PYM (PARTNER OF Y14-MAGO); protein binding"	7.61176	6.78294	7.48099	0.130767	0.0739583	-0.698046	7.56e-05	1010	1100	0.118	0.705
AT1G11410	S-locus protein kinase, putative	4.647	4.75261	4.52789	0.119106	0.148366	0.224726	0.0110011	613	1010	0.713	2.14e-06
AT1G11420	agenet domain-containing protein	4.16312	4.32917	3.801	0.362119	0.00959516	0.52817	0.000477674	317	285	-0.155	0.935
AT1G11430	plastid developmental protein DAG, putative	7.49272	7.68052	7.35009	0.142624	0.0862396	0.330422	0.00175767	1930	1660	-0.216	0.231
AT1G11440	NA	5.06816	4.72232	4.71362	0.354539	0.00628741	0.00870155	0.338529	511	708	0.472	0.00414
AT1G11450	nodulin MtN21 family protein	3.33628	3.25193	3.2829	0.0533774	0.351802	-0.0309671	0.309837	0	0	0	0
AT1G11460	nodulin MtN21 family protein	3.32343	3.48068	3.44807	-0.124643	0.159308	0.0326104	0.295723	0	0	0	0
AT1G11470	NA	3.99014	3.98658	4.11404	-0.123901	0.152713	-0.127465	0.0696227	0.242	1.12	2.2	1
AT1G11475	DNA-directed RNA polymerase II, putative	6.67363	7.10151	6.3409	0.332729	0.0718915	0.760614	0.000603528	3110	2600	-0.261	0.0393
AT1G11480	eukaryotic translation initiation factor-related	6.89318	6.5583	6.86115	0.0320282	0.353397	-0.302853	0.00162367	5530	6100	0.141	0.394
AT1G11490	zinc finger (C2H2 type) family protein	3.4411	3.41171	3.50726	-0.0661588	0.34213	-0.0955527	0.169829	4.46	4.58	0.0383	1
AT1G11500	NA	4.71718	4.15323	4.75212	-0.0349391	0.439817	-0.598888	0.00988427	16.8	17	0.0166	1
AT1G11510	DNA-binding storekeeper protein-related	4.18281	3.87071	4.30735	-0.124535	0.136367	-0.436641	0.0119856	48	39.7	-0.275	0.973
AT1G11520	pliceosome associated protein-related	4.8448	4.75305	4.90675	-0.0619528	0.284842	-0.153703	0.041125	0.568	0	0	1
AT1G11530	"ATCXXS1 (C-TERMINAL CYSTEINE RESIDUE IS CHANGED TO A SERINE 1); thiol-disulfide exchange intermediate"	5.86934	4.61641	5.52713	0.342209	0.00888072	-0.91072	7.29e-06	13.8	23.6	0.774	0.747
AT1G11540	NA	5.48211	5.14986	5.68073	-0.198619	0.0346383	-0.530866	0.000203567	66.9	59	-0.182	0.962
AT1G11545	xyloglucan:xyloglucosyl transferase, putative / xyloglucan endotransglycosylase, putative / endo-xyloglucan transferase, putative	4.3145	4.62787	4.47706	-0.162562	0.061702	0.150814	0.0478757	105	63.7	-0.715	0.227
AT1G11560	OST3/OST6 family protein	4.17354	4.30652	4.22557	-0.0520318	0.35482	0.0809562	0.166006	2.6	1.49	-0.804	1
AT1G11570	"NTL (NTF2-LIKE); protein transporter"	6.42264	6.03922	7.14259	-0.719945	0.00347404	-1.10336	4.81e-05	92	86	-0.0968	1
AT1G11572	NA	3.43161	3.48939	4.07132	-0.63971	0.000933183	-0.581924	0.000423006	0	0	0	0
AT1G11580	"ATPMEPCRA; pectinesterase"	4.73639	5.95107	5.55618	-0.819789	0.000190826	0.394896	0.0040711	8210	10500	0.354	0.077
AT1G11590	pectin methylesterase, putative	3.25516	4.36032	3.07101	0.184153	0.0566924	1.28932	3.01e-06	1330	1930	0.53	0.023
AT1G11592	other RNA	6.83428	6.66618	6.76765	0.0666321	0.295044	-0.101468	0.121273	1650	1760	0.0912	0.722
AT1G11600	"CYP77B1 (cytochrome P450, family 77, subfamily B, polypeptide 1); oxygen binding"	7.29773	4.57776	6.38886	0.908869	0.00117733	-1.81111	9.74e-06	565	494	-0.193	0.326
AT1G11608	NA	3.52907	3.55805	3.43431	0.0947544	0.24221	0.123739	0.0624069	0	0	0	0
AT1G11610	"CYP71A18 (cytochrome P450, family 71, subfamily A, polypeptide 18); oxygen binding"	3.23074	3.26372	3.19498	0.0357641	0.380526	0.0687488	0.217482	0	0	0	0
AT1G11620	F-box family protein	3.41583	3.54695	3.37387	0.0419577	0.384567	0.17308	0.0817391	0	0.872	0	1
AT1G11630	pentatricopeptide (PPR) repeat-containing protein	5.79261	5.96016	5.56628	0.226332	0.026453	0.393882	0.000516981	765	713	-0.1	0.918
AT1G11650	"ATRBP45B; RNA binding"	9.13285	9.05189	9.12203	0.0108251	0.439226	-0.0701395	0.188318	10200	10000	-0.024	0.895
AT1G11655	NA	3.28255	3.25604	3.13702	0.145529	0.125405	0.119016	0.113807	0	0.944	0	1
AT1G11660	heat shock protein, putative	5.71525	6.20834	5.61971	0.0955367	0.204795	0.588625	0.000207485	3910	3720	-0.0711	0.689
AT1G11670	MATE efflux family protein	5.25314	7.20493	4.83434	0.418798	0.0039368	2.37058	1.01e-07	2740	2970	0.116	0.675
AT1G11680	"CYP51G1 (CYTOCHROME P450 51); oxygen binding"	7.32869	8.06702	7.20729	0.121407	0.113761	0.859732	7.62e-06	14200	13100	-0.124	0.317
AT1G11684	unknown protein	2.91055	2.88123	2.87229	0.0382672	0.374434	0.00894644	0.339919	6.58	3.99	-0.721	0.896
AT1G11690	NA	3.60397	3.52063	3.97502	-0.371051	0.00445912	-0.454392	0.000941799	82	37.3	-1.14	0.0228
AT1G11700	NA	8.0507	7.42685	8.83795	-0.787247	0.000326165	-1.4111	1.95e-06	1170	1290	0.142	0.609
AT1G11710	pentatricopeptide (PPR) repeat-containing protein	4.41585	4.33386	4.16386	0.251983	0.0191739	0.169992	0.041651	244	231	-0.0754	0.922
AT1G11720	"ATSS3 (STARCH SYNTHASE 3); starch synthase/ transferase, transferring glycosyl groups"	5.00371	5.11884	4.8022	0.201509	0.0240839	0.316642	0.00438211	4250	4780	0.17	0.246
AT1G11730	galactosyltransferase family protein	4.52951	3.61947	4.62681	-0.0973002	0.166442	-1.00734	2.51e-05	27.5	34.4	0.32	0.852
AT1G11735	"MIR171B; miRNA"	3.53705	3.00024	2.84057	0.696487	0.0171429	0.159669	0.209123	0	0	0	0
AT1G11740	ankyrin repeat family protein	3.83083	4.17603	3.91068	-0.0798548	0.220138	0.26535	0.0151443	37.8	9.07	-2.06	0.123
AT1G11750	"CLPP6 (Clp protease proteolytic subunit 6); endopeptidase Clp"	6.74345	6.85684	6.5311	0.212342	0.0663206	0.325734	0.00494936	2270	2340	0.0416	0.997
AT1G11755	transferase	6.09655	6.40746	5.71508	0.381466	0.0228731	0.692378	0.000341201	1050	882	-0.251	0.23
AT1G11760	NA	8.64156	7.96275	8.1251	0.516463	0.0011116	-0.162349	0.0431229	814	818	0.00798	1
AT1G11765	S1 self-incompatibility protein-related	3.11028	3.34534	3.03658	0.0737056	0.282831	0.308765	0.0676632	6.65	0.861	-2.95	0.434
AT1G11770	electron carrier	3.67594	3.77746	3.70253	-0.0265902	0.390214	0.0749261	0.227995	2.67	8.93	1.74	0.78
AT1G11780	oxidoreductase, 2OG-Fe(II) oxygenase family protein	5.03533	5.34495	5.19258	-0.157241	0.0814985	0.152377	0.0582429	707	587	-0.266	0.307
AT1G11785	unknown protein	2.71764	3.03786	2.75465	-0.0370074	0.379487	0.283214	0.0289364	1.46	1.34	-0.125	1
AT1G11790	"ADT1 (AROGENATE DEHYDRATASE 1); arogenate dehydratase/ prephenate dehydratase"	5.32922	6.29139	5.15079	0.178434	0.0361662	1.1406	1.22e-06	2210	2090	-0.0774	0.787
AT1G11800	endonuclease/exonuclease/phosphatase family protein	6.04831	6.52102	5.75981	0.288496	0.0180044	0.761209	2.35e-05	1190	1110	-0.108	0.589
AT1G11810	F-box family protein	3.05133	3.53752	3.14535	-0.0940186	0.353975	0.392176	0.106531	20.8	0	0	2.18e-05
AT1G11820	hydrolase, hydrolyzing O-glycosyl compounds	5.79958	6.34447	5.28448	0.5151	0.00164988	1.05999	1.23e-05	2740	2070	-0.4	0.000814
AT1G11840	"ATGLX1 (GLYOXALASE I HOMOLOG); lactoylglutathione lyase"	8.97707	10.3525	8.48673	0.490336	0.000571438	1.86576	3.57e-07	29000	27100	-0.1	0.445
AT1G11850	unknown protein	3.85009	4.04799	3.9709	-0.12081	0.241446	0.0770928	0.261653	3.41	2.94	-0.213	1
AT1G11860	aminomethyltransferase, putative	7.93942	8.24329	7.30681	0.632601	0.000700845	0.936471	4.48e-06	6050	6690	0.144	0.253
AT1G11870	"AtSRS (OVULE ABORTION 7); serine-tRNA ligase"	5.78137	5.86013	5.42844	0.352929	0.00937767	0.431691	0.00097459	1020	925	-0.145	0.705
AT1G11880	NA	5.45317	5.56609	5.10826	0.344912	0.00470302	0.45783	0.000632734	801	777	-0.0435	0.909
AT1G11890	"SEC22 (secretion 22); transporter"	7.38427	8.06187	7.4896	-0.105332	0.151712	0.572267	0.000201824	3400	3020	-0.171	0.213
AT1G11900	pentatricopeptide (PPR) repeat-containing protein	4.96435	4.88698	4.70484	0.259506	0.010149	0.182137	0.0356384	241	260	0.108	0.948
AT1G11905	NA	7.66381	7.82678	8.04636	-0.382551	0.00351814	-0.219581	0.00980024	2080	1970	-0.0805	0.894
AT1G11910	aspartyl protease family protein	9.4686	8.98933	9.74377	-0.275168	0.00973695	-0.75444	3.45e-05	28600	34200	0.257	0.02
AT1G11915	NA	3.95604	4.31353	3.93926	0.0167713	0.427614	0.374264	0.00266614	76.4	64.8	-0.236	0.833
AT1G11920	pectate lyase family protein	3.74605	3.93852	3.89937	-0.153315	0.128043	0.0391505	0.23435	0	0	0	0
AT1G11925	NA	3.42896	3.09328	3.67997	-0.251013	0.0851407	-0.586691	0.00299702	0	0.511	0	1
AT1G11930	alanine racemase family protein	7.53198	7.40016	7.35499	0.176992	0.0710926	0.0451684	0.221525	2560	2920	0.19	0.0915
AT1G11940	NA	5.29928	6.17749	5.14036	0.158925	0.0541362	1.03714	1.76e-06	1960	2070	0.0735	0.75
AT1G11950	transcription factor	4.00054	4.01267	3.95924	0.0412979	0.32467	0.0534364	0.207075	395	432	0.13	1
AT1G11960	early-responsive to dehydration protein-related / ERD protein-related	5.04149	4.8624	5.01894	0.0225438	0.446664	-0.156542	0.225963	2460	3900	0.665	0.584
AT1G11970	NA	3.43307	3.67766	3.54435	-0.111287	0.221259	0.133307	0.068149	0	0	0	0
AT1G11980	RUB3 (UBIQUITIN-RELATED PROTEIN 3)	3.60636	3.80536	3.38186	0.224499	0.0846233	0.423499	0.0934898	0	0	0	0
AT1G11990	NA	3.64638	3.79127	3.70515	-0.058776	0.339804	0.0861197	0.183582	3.56	7.12	0.998	0.93
AT1G12000	pyrophosphate--fructose-6-phosphate 1-phosphotransferase beta subunit, putative / pyrophosphate-dependent 6-phosphofructose-1-kinase, putative	6.29514	7.99164	6.22966	0.065482	0.255233	1.76199	9.82e-07	22700	20900	-0.115	0.522
AT1G12010	1-aminocyclopropane-1-carboxylate oxidase, putative / ACC oxidase, putative	10.1143	7.50235	10.6011	-0.486801	0.00286638	-3.09872	1.39e-07	420	650	0.632	0.000661
AT1G12013	"SNOR111; snoRNA"	4.76769	6.01815	5.17611	-0.408424	0.101043	0.842038	0.00143965	2.03	2.2	0.115	1
AT1G12015	snoRNA	3.95473	4.133	4.47828	-0.523553	0.138901	-0.345276	0.17916	0	0	0	0
AT1G12020	NA	5.3335	4.46977	4.86281	0.470685	0.000650173	-0.393041	0.000974742	36.1	44	0.283	0.894
AT1G12030	NA	3.69787	3.65929	3.56405	0.133819	0.0654391	0.095239	0.167465	1.87	1.34	-0.482	1
AT1G12040	"LRX1 (LEUCINE-RICH REPEAT/EXTENSIN 1); protein binding / structural constituent of cell wall"	4.56645	4.87229	4.78146	-0.215014	0.0577304	0.0908277	0.121479	0	0.291	0	1
AT1G12050	fumarylacetoacetase, putative	6.99047	7.00781	7.28969	-0.29922	0.0041664	-0.281876	0.00624106	5230	5710	0.127	0.646
AT1G12060	"ATBAG5 (ARABIDOPSIS THALIANA BCL-2-ASSOCIATED ATHANOGENE 5); protein binding"	6.00732	5.0865	6.66925	-0.66193	0.00127505	-1.58274	3.37e-05	106	148	0.489	0.482
AT1G12064	NA	4.14425	3.855	3.99363	0.15062	0.223194	-0.138631	0.168037	0.242	0	0	1
AT1G12070	Rho GDP-dissociation inhibitor family protein	3.43596	3.59624	3.48477	-0.0488122	0.333861	0.111465	0.135127	4.46	3.78	-0.238	1
AT1G12080	NA	7.54943	5.86724	7.46764	0.0817902	0.274722	-1.6004	1.88e-05	83.3	269	1.69	0.0132
AT1G12090	"ELP (EXTENSIN-LIKE PROTEIN); lipid binding"	10.0951	10.65	10.4299	-0.334863	0.00539985	0.220098	0.007835	22800	27900	0.294	0.000799
AT1G12100	lipid binding	3.88303	4.13271	3.79205	0.0909849	0.187008	0.340666	0.0110866	1.46	5.96	2.03	0.641
AT1G12110	"NRT1.1 (NITRATE TRANSPORTER 1.1); transporter"	4.41362	5.60615	4.28108	0.132541	0.0877324	1.32507	7.62e-06	816	793	-0.0403	0.967
AT1G12120	NA	6.73078	6.60771	6.65968	0.0711026	0.215361	-0.0519637	0.186595	5760	5580	-0.0442	1
AT1G12130	flavin-containing monooxygenase family protein / FMO family protein	3.36036	3.25985	3.43309	-0.0727344	0.213858	-0.173239	0.0208186	9.74	12.7	0.378	0.991
AT1G12140	flavin-containing monooxygenase family protein / FMO family protein	6.16095	6.42336	6.53717	-0.37622	0.00225156	-0.11381	0.0735885	623	613	-0.0236	1
AT1G12150	NA	4.90235	3.76181	5.9264	-1.02406	0.000577459	-2.1646	2.61e-06	21.4	47.6	1.16	0.11
AT1G12160	flavin-containing monooxygenase family protein / FMO family protein	4.58402	4.8735	4.17837	0.405647	0.00914232	0.69513	7.25e-05	505	649	0.361	0.056
AT1G12170	F-box family protein	2.95749	3.02199	3.17683	-0.219337	0.0192576	-0.154837	0.0332738	0	0	0	0
AT1G12180	NA	3.94137	4.04134	4.02534	-0.0839695	0.192481	0.0160019	0.324531	6090	7030	0.206	0.828
AT1G12190	F-box family protein	3.35044	3.84435	3.43615	-0.085711	0.265195	0.408202	0.00168909	1.3	0	0	0.887
AT1G12200	flavin-containing monooxygenase family protein / FMO family protein	8.01057	6.94123	8.36282	-0.35225	0.0042544	-1.42159	6.53e-07	3350	3910	0.224	0.252
AT1G12210	"RFL1 (RPS5-LIKE 1); ATP binding / protein binding"	3.29843	3.34063	3.38038	-0.0819437	0.175705	-0.0397428	0.241341	342	349	0.0278	0.96
AT1G12211	unknown protein	3.04403	3.161	3.27315	-0.229126	0.0794975	-0.112157	0.140772	0	0	0	0
AT1G12220	RPS5 (RESISTANT TO P. SYRINGAE 5)	3.38269	3.3702	3.34684	0.0358483	0.359659	0.0233592	0.295494	139	142	0.0343	1
AT1G12230	transaldolase, putative	7.24478	7.23661	6.83184	0.412948	0.00206352	0.404772	0.00103097	3820	4070	0.0908	0.813
AT1G12240	"ATBETAFRUCT4/VAC-INV (VACUOLAR INVERTASE); beta-fructofuranosidase/ hydrolase, hydrolyzing O-glycosyl compounds"	5.45188	6.28456	6.07351	-0.621633	0.000353415	0.211042	0.0159058	24600	24500	-0.00508	1
AT1G12244	DNA binding / hydrolase, acting on ester bonds / nuclease/ nucleic acid binding / recombinase	4.91316	5.19922	4.50574	0.407422	0.0203065	0.693479	7.63e-05	658	672	0.0299	1
AT1G12250	thylakoid lumenal protein-related	6.24238	5.47516	6.08958	0.152802	0.201668	-0.614426	0.000928262	373	526	0.495	0.00341
AT1G12260	"VND4 (VASCULAR RELATED NAC-DOMAIN PROTEIN 4); transcription factor"	3.44228	3.55763	3.58892	-0.146636	0.105443	-0.0312916	0.28183	38.1	36.6	-0.06	1
AT1G12270	stress-inducible protein, putative	6.16975	6.74122	5.97543	0.194323	0.0417198	0.765788	1.01e-05	6030	5300	-0.189	0.0659
AT1G12280	disease resistance protein (CC-NBS-LRR class), putative	4.27734	3.91224	4.3597	-0.0823633	0.232418	-0.447456	0.000618274	256	307	0.267	0.513
AT1G12290	disease resistance protein (CC-NBS-LRR class), putative	3.78897	3.62315	3.70482	0.0841552	0.208894	-0.0816683	0.174839	99.4	141	0.5	0.356
AT1G12290	disease resistance protein (CC-NBS-LRR class), putative	3.84832	3.55155	3.69366	0.15466	0.0610254	-0.14211	0.0451513	99.4	141	0.5	0.356
AT1G12294	"MIR472a; miRNA"	4.51679	3.2951	3.80642	0.71037	0.0448515	-0.51132	0.0385083	0	0	0	0
AT1G12300	pentatricopeptide (PPR) repeat-containing protein	5.36117	5.02636	5.08702	0.274155	0.0118409	-0.0606587	0.207491	621	615	-0.0135	1
AT1G12310	calmodulin, putative	8.98643	9.26205	9.11289	-0.126463	0.135842	0.149158	0.0592328	4680	4920	0.0723	0.647
AT1G12320	NA	6.64937	4.45866	7.72605	-1.07668	0.000217144	-3.26739	8.71e-08	32.2	25.4	-0.341	0.803
AT1G12330	NA	8.33434	9.27241	7.58567	0.748666	0.000474607	1.68674	1.32e-06	11200	11300	0.00938	1
AT1G12350	"ATCOAB (4-PHOSPHO-PANTO-THENOYLCYSTEINE SYNTHETASE); catalytic/ phosphopantothenate--cysteine ligase"	6.30536	6.46827	6.28963	0.0157281	0.433763	0.178637	0.0294916	1390	1450	0.0649	1
AT1G12360	"KEU (KEULE); protein transporter"	5.98883	5.41006	5.93378	0.0550452	0.274535	-0.523719	8.22e-05	4030	4640	0.202	0.212
AT1G12370	PHR1 (PHOTOLYASE 1)	4.55602	5.54714	4.42047	0.135554	0.0999046	1.12667	2.51e-05	1320	1300	-0.0204	1
AT1G12380	NA	5.49387	6.20277	5.1821	0.311769	0.00876623	1.02067	4.95e-06	8860	8710	-0.024	1
AT1G12390	cornichon family protein	5.6081	5.4252	5.62064	-0.0125348	0.451436	-0.19544	0.0710101	1790	1710	-0.0667	1
AT1G12400	DNA binding	4.98926	5.70208	5.14776	-0.158495	0.0831667	0.554317	0.000129604	332	354	0.0916	1
AT1G12410	"CLPR2 (Clp protease proteolytic subunit 2); endopeptidase Clp"	7.03833	7.19683	7.14101	-0.102681	0.146905	0.0558209	0.189411	3240	3350	0.0507	0.871
AT1G12411	unknown protein	2.94901	2.63665	2.54882	0.400188	0.0561671	0.0878341	0.182375	0	0	0	0
AT1G12420	ACR8 (ACT Domain Repeat 8)	5.11668	4.85247	5.27539	-0.158701	0.179095	-0.422914	0.0057943	1360	1380	0.0245	1
AT1G12423	unknown protein	3.09635	3.50142	3.10119	-0.00483213	0.470433	0.400235	0.086764	0	0	0	0
AT1G12430	"PAK (PHOSPHATIDIC ACID KINASE); microtubule motor"	5.37407	4.90351	5.47347	-0.0994055	0.17121	-0.569964	0.000207971	2650	2620	-0.0166	1
AT1G12440	zinc finger (AN1-like) family protein	9.13637	8.27073	9.01722	0.119152	0.0856146	-0.74649	7.02e-06	3450	3760	0.123	0.53
AT1G12450	NA	6.54943	6.59506	6.85848	-0.309051	0.00584886	-0.263428	0.00446966	1220	1320	0.116	0.718
AT1G12451	unknown protein	3.18103	3.22739	2.98587	0.19516	0.313229	0.241524	0.0719869	0	0	0	0
AT1G12460	leucine-rich repeat transmembrane protein kinase, putative	5.14361	5.95213	4.55346	0.590156	0.00224506	1.39868	8.52e-06	10300	9400	-0.137	0.286
AT1G12470	Pep3/Vps18/deep orange family protein	5.03354	5.21866	4.97234	0.0612007	0.243998	0.246317	0.00375662	4390	4250	-0.0458	0.802
AT1G12480	"CDI3/OZS1/RCD3/SLAC1 (SLOW ANION CHANNEL-ASSOCIATED 1); transporter"	3.74079	3.66118	3.68595	0.0548408	0.364948	-0.0247704	0.312242	17.8	21.5	0.272	1
AT1G12490	F-box family protein-related	3.52776	3.39709	3.60684	-0.0790871	0.184639	-0.209752	0.0655499	0.326	0	0	1
AT1G12500	phosphate translocator-related	5.31307	6.7051	5.04746	0.265605	0.0160104	1.65763	3.17e-06	2490	1800	-0.47	1.69e-05
AT1G12520	"CCS1 (copper chaperone for superoxide dismutase 1); superoxide dismutase copper chaperone"	7.3921	7.10799	7.04063	0.35147	0.00450187	0.0673635	0.145606	2860	2180	-0.389	0.504
AT1G12530	NA	6.22939	6.06336	6.37479	-0.145392	0.0912911	-0.311422	0.00339219	837	871	0.0586	0.967
AT1G12540	basic helix-loop-helix (bHLH) family protein	2.91709	2.94917	3.01097	-0.0938775	0.19009	-0.0617969	0.196585	0	0	0	0
AT1G12550	oxidoreductase family protein	5.91173	7.1675	5.84689	0.0648421	0.275864	1.32061	1.36e-06	1840	1820	-0.021	1
AT1G12560	ATEXPA7 (ARABIDOPSIS THALIANA EXPANSIN A7)	3.89671	3.89111	3.7573	0.139407	0.183626	0.133803	0.146586	0	0	0	0
AT1G12570	glucose-methanol-choline (GMC) oxidoreductase family protein	3.75275	3.87989	3.77525	-0.0224987	0.416824	0.104639	0.141501	3.41	7.53	1.14	0.825
AT1G12580	"PEPKR1 (PHOSPHOENOLPYRUVATE CARBOXYLASE-RELATED KINASE 1); kinase"	6.35872	5.78928	6.16686	0.19186	0.0274553	-0.377587	0.0139297	2080	2220	0.0972	0.965
AT1G12600	NA	4.7305	4.63674	4.79746	-0.0669661	0.238689	-0.160722	0.0608195	143	153	0.0911	1
AT1G12610	"DDF1 (DWARF AND DELAYED FLOWERING 1); DNA binding / transcription factor"	5.14866	5.01512	4.12233	1.02633	0.00733813	0.892796	0.0474664	245	482	0.976	0.385
AT1G12620	pentatricopeptide (PPR) repeat-containing protein	4.6841	4.76752	4.89134	-0.207237	0.043318	-0.12382	0.101632	637	604	-0.0773	1
AT1G12630	DNA binding / transcription activator/ transcription factor	4.31177	4.23161	4.3837	-0.0719387	0.255792	-0.152097	0.0966418	0.242	0.861	1.83	1
AT1G12640	membrane bound O-acyl transferase (MBOAT) family protein	7.0865	6.26663	8.01709	-0.930584	0.000278754	-1.75045	3e-07	2140	2320	0.115	0.678
AT1G12650	NA	6.11331	6.06687	6.17908	-0.065768	0.241388	-0.112205	0.0844385	2110	1660	-0.35	0.00571
AT1G12660	NA	5.32388	6.0172	6.01856	-0.694677	0.014217	-0.00135609	0.354581	120	1.14	-6.72	9.44e-31
AT1G12663	NA	3.85573	4.74446	4.4581	-0.602367	0.000648206	0.28636	0.00480454	17.3	0	0	0.000109
AT1G12665	NA	2.92842	4.37588	2.82944	0.098973	0.251616	1.54644	0.000149928	566	3.16	-7.49	8.13e-96
AT1G12672	NA	6.48228	5.40025	6.47125	0.0110365	0.442531	-1.071	2.87e-05	216	58.1	-1.89	0.049
AT1G12680	"PEPKR2 (PHOSPHOENOLPYRUVATE CARBOXYLASE-RELATED KINASE 2); kinase"	7.01447	6.55964	7.0527	-0.0382229	0.354677	-0.49306	0.000210089	2380	2740	0.205	0.18
AT1G12700	helicase domain-containing protein / pentatricopeptide (PPR) repeat-containing protein	3.76172	3.77642	3.58179	0.179928	0.0277094	0.194636	0.0101984	256	277	0.114	0.957
AT1G12710	"ATPP2-A12 (PHLOEM PROTEIN 2-A12); carbohydrate binding"	6.22109	7.34764	5.82053	0.400563	0.00953936	1.52711	3.23e-06	1360	1080	-0.334	0.0185
AT1G12720	transposable element gene	3.32917	3.32443	3.2618	0.0673647	0.253427	0.0626311	0.269316	0	0	0	0
AT1G12725	transposable element gene	3.11084	3.1162	3.4751	-0.364262	0.0116108	-0.358903	0.0224356	0	0	0	0
AT1G12730	cell division cycle protein-related	5.2298	5.12845	4.83705	0.392753	0.00944724	0.291402	0.0102384	972	1050	0.11	0.943
AT1G12740	"CYP87A2 (cytochrome P450, family 87, subfamily A, polypeptide 2); oxygen binding"	3.2338	3.17602	3.29883	-0.0650354	0.235743	-0.122813	0.0636101	0	0	0	0
AT1G12750	rhomboid family protein	4.96881	4.91777	4.82791	0.140907	0.147937	0.0898634	0.14267	600	648	0.11	0.671
AT1G12760	protein binding / ubiquitin-protein ligase/ zinc ion binding	6.73177	5.77127	6.97621	-0.244435	0.0311375	-1.20494	9.64e-06	1740	2120	0.285	0.0234
AT1G12770	EMB1586 (EMBRYO DEFECTIVE 1586)	5.36648	5.44043	4.99292	0.373552	0.0115298	0.447511	0.00067813	1280	1330	0.0504	1
AT1G12775	binding	4.91442	4.79965	4.45092	0.463494	0.00742927	0.348729	0.011448	429	346	-0.312	0.382
AT1G12780	"UGE1 (UDP-D-GLUCOSE/UDP-D-GALACTOSE 4-EPIMERASE 1); UDP-glucose 4-epimerase/ protein dimerization"	8.50489	6.81496	9.00692	-0.502026	0.000957666	-2.19195	1.3e-07	1630	2290	0.492	0.000127
AT1G12790	NA	5.38587	4.84184	5.51188	-0.12601	0.111438	-0.670038	4.15e-05	260	263	0.0193	1
AT1G12800	S1 RNA-binding domain-containing protein	5.12278	5.05959	5.02428	0.0984973	0.135842	0.0353037	0.250629	3040	2910	-0.066	1
AT1G12805	nucleotide binding	3.89983	3.69918	3.70705	0.192772	0.170281	-0.00787661	0.348462	14.7	2.14	-2.78	0.722
AT1G12810	proline-rich family protein	8.08218	8.11763	8.27712	-0.194933	0.0196242	-0.159491	0.0289467	1480	1810	0.286	0.0705
AT1G12820	"AFB3 (AUXIN SIGNALING F-BOX 3); auxin binding / ubiquitin-protein ligase"	7.56779	6.70417	7.32717	0.240622	0.0106287	-0.623	7.36e-05	4190	4660	0.153	0.279
AT1G12830	unknown protein	7.51828	8.13692	7.18803	0.330248	0.0162999	0.948895	6.92e-06	2760	2420	-0.19	0.123
AT1G12840	DET3 (DE-ETIOLATED 3)	7.74049	8.6495	7.88128	-0.140792	0.0772985	0.768214	3.07e-05	11900	11200	-0.0938	0.655
AT1G12845	NA	7.23449	7.94755	6.47651	0.757976	0.000347123	1.47104	1.39e-06	937	1090	0.213	0.339
AT1G12850	phosphoglycerate/bisphosphoglycerate mutase family protein	6.36682	6.76937	6.5789	-0.21208	0.0399448	0.190475	0.0234944	4510	4680	0.0531	0.898
AT1G12860	basic helix-loop-helix (bHLH) family protein / F-box family protein	5.22867	4.75095	4.58033	0.64834	0.00184034	0.170615	0.0639633	1220	1480	0.278	0.603
AT1G12870	S locus F-box-related / SLF-related	2.77026	2.97892	2.97815	-0.207886	0.0552568	0.000774083	0.354637	0.242	0	0	1
AT1G12880	"ATNUDT12 (Arabidopsis thaliana Nudix hydrolase homolog 12); hydrolase"	6.512	5.80232	5.96076	0.551243	0.00520198	-0.15844	0.0860647	1290	1520	0.231	0.0567
AT1G12890	AP2 domain-containing transcription factor, putative	5.02364	3.97885	4.78044	0.243201	0.013996	-0.801592	0.000177441	110	146	0.403	0.184
AT1G12900	"GAPA-2; glyceraldehyde-3-phosphate dehydrogenase"	7.97481	7.47058	7.75398	0.220826	0.0287242	-0.283401	0.00320298	2830	3780	0.416	0.00887
AT1G12910	"ATAN11 (ANTHOCYANIN11); nucleotide binding"	9.0237	8.69342	8.80198	0.221721	0.0192501	-0.108555	0.0919517	2870	2880	0.00607	1
AT1G12920	"ERF1-2 (EUKARYOTIC RELEASE FACTOR 1-2); translation release factor"	7.46064	7.81362	6.99728	0.463352	0.00214905	0.816337	0.000131483	9210	6900	-0.416	7.68e-06
AT1G12930	importin-related	5.41119	5.36174	5.12761	0.283579	0.00789236	0.23413	0.0105298	3070	3120	0.0231	1
AT1G12938	unknown protein	3.23065	3.51611	3.24135	-0.0107034	0.46152	0.27476	0.040314	0	0	0	0
AT1G12940	"ATNRT2.5 (NITRATE TRANSPORTER2.5); nitrate transmembrane transporter"	4.16475	4.29515	4.24314	-0.0783827	0.278813	0.0520149	0.247339	5.03	5.91	0.231	1
AT1G12950	MATE efflux family protein	4.29466	4.15982	4.45765	-0.162986	0.161963	-0.297831	0.0221647	7.05	3.67	-0.942	0.687
AT1G12960	60S ribosomal protein L27A (RPL27aA)	4.32829	4.56228	4.23528	0.0930168	0.32918	0.32701	0.0224576	0	0	0	0
AT1G12970	leucine-rich repeat family protein	5.7385	5.03127	5.61567	0.122831	0.0961278	-0.584396	0.000451206	670	741	0.145	0.846
AT1G12980	"ESR1 (ENHANCER OF SHOOT REGENERATION 1); DNA binding / transcription factor"	3.90671	4.41405	4.06057	-0.153853	0.190619	0.353482	0.00354231	3.4	1.89	-0.842	0.937
AT1G12990	glycosyl transferase family 17 protein	5.92471	6.43846	5.95305	-0.0283433	0.425947	0.485407	0.00202424	2120	1740	-0.282	0.0841
AT1G13000	NA	5.07164	5.1237	5.44379	-0.372144	0.00249208	-0.320091	0.00191219	892	907	0.0232	0.994
AT1G13020	eukaryotic translation initiation factor, putative (EIF4B5)	6.03285	6.54288	6.16716	-0.134307	0.0763179	0.375722	0.00122414	4660	3980	-0.228	0.0179
AT1G13030	sphere organelles protein-related	5.3075	5.45027	4.90523	0.402271	0.00140556	0.545034	0.000427202	2160	1580	-0.447	0.00025
AT1G13040	pentatricopeptide (PPR) repeat-containing protein	3.40755	3.54404	3.37118	0.0363766	0.348559	0.172867	0.0459606	368	322	-0.193	0.519
AT1G13050	NA	5.35222	5.46417	5.20946	0.142763	0.195321	0.254715	0.0235834	461	435	-0.082	0.94
AT1G13060	"PBE1 (20S proteasome beta subunit E1); peptidase"	8.05956	8.443	8.09148	-0.0319193	0.38176	0.35152	0.00145559	10000	10400	0.0522	0.942
AT1G13080	"CYP71B2 (CYTOCHROME P450 71B2); oxygen binding"	4.83337	3.44239	5.93888	-1.1055	0.000385634	-2.49649	2.58e-07	9.58	10.5	0.138	0.883
AT1G13090	"CYP71B28 (cytochrome P450, family 71, subfamily B, polypeptide 28); oxygen binding"	7.54041	5.4561	7.88697	-0.346558	0.00387026	-2.43087	7.11e-08	1120	1580	0.505	0.000429
AT1G13100	"CYP71B29 (cytochrome P450, family 71, subfamily B, polypeptide 29); oxygen binding"	5.2384	3.87605	5.50882	-0.27042	0.0355996	-1.63277	1e-06	0.242	6	4.63	0.329
AT1G13110	"CYP71B7 (cytochrome P450, family 71, subfamily B, polypeptide 7); oxygen binding"	5.36944	3.78984	5.41888	-0.049436	0.307426	-1.62904	5.19e-07	19.1	27	0.498	0.766
AT1G13120	EMB1745 (EMBRYO DEFECTIVE 1745)	5.06703	5.21277	4.8954	0.171637	0.0649535	0.317375	0.0012706	2630	2190	-0.262	0.0659
AT1G13130	glycosyl hydrolase family 5 protein / cellulase family protein	4.2691	5.8182	4.28819	-0.0190855	0.42487	1.53001	1.36e-06	588	703	0.256	0.371
AT1G13140	"CYP86C3 (cytochrome P450, family 86, subfamily C, polypeptide 3); oxygen binding"	3.82921	3.74244	3.90179	-0.0725856	0.233836	-0.159357	0.0421197	174	212	0.285	0.468
AT1G13150	"CYP86C4 (cytochrome P450, family 86, subfamily C, polypeptide 4); oxygen binding"	3.44882	3.39524	3.65818	-0.209359	0.0466454	-0.262935	0.00713919	151	195	0.365	0.306
AT1G13160	SDA1 family protein	5.34833	5.69797	5.09624	0.252097	0.00661565	0.601734	3.16e-05	3940	2740	-0.524	0.000874
AT1G13170	oxysterol-binding family protein	4.94568	4.9228	4.77732	0.168362	0.0392401	0.145475	0.0411524	4790	4920	0.0385	0.932
AT1G13180	"DIS1 (DISTORTED TRICHOMES 1); structural constituent of cytoskeleton"	5.16167	5.56726	5.2799	-0.118226	0.13436	0.287355	0.00501099	1970	1790	-0.138	0.634
AT1G13190	RNA recognition motif (RRM)-containing protein	6.49662	6.15434	6.69573	-0.199113	0.0263567	-0.541396	0.000138872	3780	3860	0.0297	1
AT1G13195	zinc finger (C3HC4-type RING finger) family protein	6.68326	6.13146	6.62145	0.0618034	0.238469	-0.489998	0.000559792	709	714	0.0116	1
AT1G13200	F-box family protein	3.72096	3.80533	3.77492	-0.0539562	0.347997	0.0304124	0.30717	2.03	0.315	-2.69	0.901
AT1G13210	"ACA.L (AUTOINHIBITED CA2+/ATPASE II); ATPase, coupled to transmembrane movement of ions, phosphorylative mechanism / calmodulin binding"	4.12158	3.9704	4.34884	-0.227252	0.0262872	-0.378436	0.000374331	1660	1860	0.162	0.518
AT1G13220	"LINC2 (LITTLE NUCLEI2); protein binding"	3.59912	3.50844	3.68815	-0.0890301	0.387621	-0.179708	0.197458	3310	3310	0.00124	1
AT1G13230	leucine-rich repeat family protein	7.22999	4.65327	7.03084	0.199148	0.0538245	-2.37757	1.68e-07	343	492	0.52	0.00716
AT1G13245	DVL4/RTFL17 (ROTUNDIFOLIA LIKE 17)	4.97867	3.79301	6.0946	-1.11593	0.000367645	-2.30159	5.26e-07	17.6	14.4	-0.287	0.892
AT1G13250	"GATL3 (Galacturonosyltransferase-like 3); polygalacturonate 4-alpha-galacturonosyltransferase/ transferase, transferring glycosyl groups / transferase, transferring hexosyl groups"	6.32125	6.8156	6.01237	0.308889	0.00937767	0.803231	3.81e-05	1260	1390	0.146	0.46
AT1G13260	"RAV1 (Related to ABI3/VP1 1); DNA binding / transcription factor"	6.40578	6.70035	6.1848	0.220985	0.1203	0.515547	0.0270184	1750	2010	0.197	0.567
AT1G13270	"MAP1C (METHIONINE AMINOPEPTIDASE 1B); metalloexopeptidase"	5.40714	5.97848	5.14026	0.266885	0.0347957	0.838221	7.14e-05	799	610	-0.391	0.0235
AT1G13280	AOC4 (ALLENE OXIDE CYCLASE 4)	8.65197	8.16676	8.40689	0.245083	0.0103252	-0.240133	0.0057225	5480	6470	0.241	0.114
AT1G13290	zinc finger (C2H2 type) family protein	4.03908	4.20431	4.11294	-0.0738533	0.265446	0.0913752	0.183691	0.326	0	0	1
AT1G13300	myb family transcription factor	3.7837	3.82991	3.81218	-0.0284807	0.394196	0.0177326	0.321073	0	0	0	0
AT1G13310	NA	3.23376	3.2661	3.41102	-0.177259	0.0634896	-0.144924	0.0674509	1.78	4.51	1.34	0.982
AT1G13320	"PP2AA3/PR65 (PROTEIN PHOSPHATASE 2A SUBUNIT A3); protein phosphatase type 2A regulator"	6.99554	7.45267	6.98979	0.00575818	0.459402	0.462887	0.000381444	5240	5050	-0.0534	0.854
AT1G13330	NA	4.25165	4.80529	4.04452	0.207129	0.121953	0.760774	0.00031032	663	549	-0.272	0.229
AT1G13340	NA	4.28127	4.50029	4.61172	-0.330452	0.00416718	-0.111429	0.158771	117	127	0.126	1
AT1G13350	protein kinase family protein	4.24395	4.14011	4.36094	-0.116987	0.204307	-0.220827	0.0338152	2670	2880	0.107	0.617
AT1G13360	NA	8.66226	8.52764	8.82071	-0.158443	0.0636514	-0.293066	0.00317714	2830	3550	0.324	0.035
AT1G13370	histone H3, putative	5.33092	4.61335	5.29119	0.0397291	0.413015	-0.677843	0.00241821	30	47.8	0.672	0.383
AT1G13380	NA	8.5728	8.80644	7.8843	0.688495	0.000672825	0.922142	2.57e-05	2260	2140	-0.0758	0.749
AT1G13390	NA	6.92095	6.04435	7.12937	-0.208416	0.104024	-1.08502	1.45e-05	922	968	0.0709	0.972
AT1G13400	"JGL/NUB (NUBBIN); nucleic acid binding / zinc ion binding"	4.00998	4.00652	3.94699	0.0629864	0.277672	0.0595251	0.246117	0.242	0	0	1
AT1G13410	binding	3.41403	3.45537	3.40474	0.00928828	0.443919	0.0506293	0.196263	244	184	-0.413	0.233
AT1G13420	sulfotransferase family protein	3.50309	3.96297	3.6342	-0.131117	0.113054	0.328771	0.00387921	11.8	28.3	1.27	0.445
AT1G13430	sulfotransferase family protein	3.13056	2.85974	3.26573	-0.135171	0.0729174	-0.40599	0.000286652	9.81	14.5	0.56	1
AT1G13440	"GAPC-2; glyceraldehyde-3-phosphate dehydrogenase"	9.77943	9.84191	9.40647	0.37296	0.00215063	0.435438	0.00106768	56000	55600	-0.0118	1
AT1G13448	other RNA	6.83126	4.70323	7.1802	-0.348941	0.00455306	-2.47697	1.98e-06	6.73	17.6	1.38	0.5
AT1G13450	DNA binding protein GT-1	6.90095	5.53252	6.5167	0.384252	0.00206812	-0.984177	4.21e-06	1280	1510	0.235	0.157
AT1G13460	serine/threonine protein phosphatase 2A (PP2A) regulatory subunit B', putative	4.70128	4.90885	4.83298	-0.131704	0.0669772	0.0758667	0.165814	1130	956	-0.239	0.445
AT1G13470	NA	3.23276	3.31789	3.1794	0.0533595	0.34872	0.138483	0.14486	0	0	0	0
AT1G13480	NA	3.33656	3.34319	3.41227	-0.0757061	0.264121	-0.0690749	0.207913	0	0	0	0
AT1G13490	NA	3.70225	3.79541	3.65265	0.0495969	0.413331	0.14276	0.165509	0	0	0	0
AT1G13500	NA	3.75248	3.76897	3.58778	0.164703	0.100024	0.181194	0.061362	0	0	0	0
AT1G13510	NA	3.24954	3.38207	3.31893	-0.0693847	0.270501	0.0631408	0.212633	0	0	0	0
AT1G13520	NA	3.14059	3.34922	3.32722	-0.186628	0.151388	0.0220002	0.313656	1.14	0.767	-0.567	1
AT1G13530	NA	3.55039	3.49621	3.50499	0.0453994	0.390462	-0.00877871	0.337674	2.35	1.02	-1.2	0.931
AT1G13540	NA	3.55354	3.49791	3.54831	0.00522922	0.461111	-0.0504013	0.238459	0.894	1.41	0.655	1
AT1G13550	NA	3.41572	3.48376	3.41178	0.00394618	0.463803	0.0719865	0.201699	3.48	12.6	1.86	0.52
AT1G13560	"AAPT1 (AMINOALCOHOLPHOSPHOTRANSFERASE 1); phosphatidyltransferase"	6.56242	6.83559	6.37229	0.190133	0.0372899	0.463295	0.000311089	5470	5350	-0.0338	0.933
AT1G13570	F-box family protein	6.86216	6.40643	6.54657	0.315593	0.00624698	-0.140141	0.0420089	1740	1850	0.0934	0.667
AT1G13580	LAG13 (LAG1 LONGEVITY ASSURANCE HOMOLOG 3)	6.28362	6.50346	6.83168	-0.54806	0.00164166	-0.32822	0.00144634	1220	1030	-0.242	0.276
AT1G13590	"ATPSK1 (PHYTOSULFOKINE 1 PRECURSOR); growth factor"	3.82398	4.58793	3.83364	-0.00965617	0.457011	0.754291	1.21e-05	3.65	4.06	0.153	1
AT1G13600	"ATBZIP58 (ARABIDOPSIS THALIANA BASIC LEUCINE-ZIPPER 58); DNA binding / protein heterodimerization/ protein homodimerization/ transcription factor"	3.55973	3.33954	3.44138	0.118352	0.263665	-0.101839	0.197051	0	0.315	0	1
AT1G13605	methyltransferase	3.85914	6.76476	3.75523	0.103908	0.153892	3.00953	3.11e-07	1320	37.4	-5.15	2.9e-141
AT1G13607	NA	3.0708	3.92798	3.15396	-0.0831663	0.331423	0.77402	0.0072805	1.38	0	0	0.843
AT1G13608	NA	3.64545	4.78137	3.79622	-0.150772	0.315094	0.985146	0.00242892	0.326	1.14	1.81	1
AT1G13609	NA	2.84346	6.79342	3.17513	-0.331666	0.00685222	3.61829	4.09e-08	428	59.5	-2.85	5.63e-26
AT1G13610	NA	3.6884	3.7535	3.65469	0.0337114	0.380045	0.0988125	0.149586	0	0.256	0	1
AT1G13620	NA	3.18772	3.33305	3.22664	-0.0389261	0.386355	0.10641	0.203466	0	0	0	0
AT1G13630	pentatricopeptide (PPR) repeat-containing protein	3.60841	3.60709	3.46704	0.141379	0.136003	0.140052	0.0659969	181	166	-0.122	1
AT1G13635	methyladenine glycosylase family protein	3.09011	3.15046	3.07971	0.0103949	0.450336	0.0707477	0.217121	0	0	0	0
AT1G13640	phosphatidylinositol 3- and 4-kinase family protein	6.68359	5.94552	6.26749	0.416105	0.00186239	-0.321969	0.00500147	3000	3260	0.12	0.417
AT1G13650	NA	3.46032	4.17327	3.53786	-0.0775418	0.267929	0.635404	0.000670697	11.9	1.55	-2.94	0.105
AT1G13670	unknown protein	3.60078	3.60552	3.6759	-0.0751273	0.2764	-0.0703888	0.166126	0	0.256	0	1
AT1G13680	phospholipase C	3.65217	5.35314	3.79815	-0.145981	0.127216	1.55499	8.64e-06	291	30.6	-3.25	7.16e-35
AT1G13690	"ATE1 (ATPase E1); nucleic acid binding"	7.88394	8.18485	7.60425	0.279691	0.0211281	0.580599	9.32e-05	1680	1700	0.0165	1
AT1G13700	glucosamine/galactosamine-6-phosphate isomerase family protein	7.87413	5.2216	8.34427	-0.470143	0.000648206	-3.12268	2.55e-07	146	173	0.252	0.774
AT1G13710	"CYP78A5 (cytochrome P450, family 78, subfamily A, polypeptide 5); oxygen binding"	4.13935	7.77627	4.09925	0.0400971	0.385827	3.67702	3.01e-08	442	486	0.134	1
AT1G13730	nuclear transport factor 2 (NTF2) family protein / RNA recognition motif (RRM)-containing protein	5.75643	6.60436	5.40714	0.349299	0.0126309	1.19723	6.34e-06	3950	2960	-0.414	2.45e-05
AT1G13740	NA	6.06576	5.79391	6.11163	-0.0458747	0.357087	-0.317718	0.00427893	813	834	0.0363	1
AT1G13750	calcineurin-like phosphoesterase family protein	3.67403	3.72664	3.89085	-0.21682	0.0529677	-0.16421	0.0697593	69.8	70.1	0.00496	0.936
AT1G13755	NA	5.68797	5.64381	5.54934	0.138635	0.191979	0.0944737	0.227183	454	313	-0.534	0.0512
AT1G13760	unknown protein	3.74059	3.90472	3.9598	-0.219207	0.0249742	-0.055079	0.255097	0	0.256	0	1
AT1G13770	NA	5.58308	5.23326	5.45099	0.132084	0.108928	-0.217728	0.00988491	1640	1640	0.00469	1
AT1G13780	NA	5.15588	4.62264	5.1742	-0.0183227	0.433631	-0.551564	0.00108542	600	601	0.00198	1
AT1G13790	XH/XS domain-containing protein / XS zinc finger domain-containing protein	4.82728	5.17364	4.49064	0.336632	0.00291605	0.682996	0.000207199	2530	2530	0.00309	0.998
AT1G13800	pentatricopeptide (PPR) repeat-containing protein	3.60517	3.78845	3.72307	-0.1179	0.216711	0.0653781	0.22333	214	184	-0.22	0.424
AT1G13810	DNA binding / magnesium ion binding / nuclease	5.72152	5.8785	5.29171	0.42981	0.0085644	0.586789	0.000893106	457	383	-0.253	0.396
AT1G13820	hydrolase, alpha/beta fold family protein	4.56082	4.61057	4.29234	0.268473	0.0397578	0.318231	0.00872023	339	374	0.14	0.643
AT1G13830	beta-1,3-glucanase-related	5.6059	6.38004	6.22128	-0.61538	0.00057141	0.158756	0.0738697	191	235	0.298	0.501
AT1G13860	dehydration-responsive protein-related	4.14005	4.20168	3.91903	0.221015	0.0168208	0.282649	0.0059755	696	763	0.132	0.658
AT1G13870	DRL1 (DEFORMED ROOTS AND LEAVES 1)	6.87254	6.78938	6.71488	0.157665	0.0651712	0.0744973	0.188212	1030	941	-0.129	0.465
AT1G13880	ELM2 domain-containing protein	6.67653	6.1853	6.85326	-0.176724	0.0538888	-0.66796	8.64e-05	1820	1990	0.133	0.683
AT1G13890	SNAP30 (synaptosomal-associated protein 30)	3.43418	3.5077	3.47058	-0.0363937	0.405262	0.0371201	0.289919	3.98	4.29	0.108	1
AT1G13900	calcineurin-like phosphoesterase family protein	6.16481	6.5648	6.18775	-0.022936	0.401553	0.377053	0.000617735	3470	3560	0.037	1
AT1G13910	leucine-rich repeat family protein	5.46448	5.21005	5.54292	-0.0784362	0.217787	-0.332869	0.0162986	668	670	0.00312	0.99
AT1G13920	remorin family protein	4.99158	4.72227	5.07706	-0.0854811	0.19065	-0.354798	0.00230421	400	347	-0.202	0.913
AT1G13930	NA	10.5368	6.87668	10.4004	0.136422	0.224692	-3.52373	4.36e-08	1410	1990	0.495	0.675
AT1G13940	NA	4.64902	4.40516	4.76431	-0.115291	0.109095	-0.359148	0.00183723	2110	2080	-0.0218	1
AT1G13950	"EIF-5A (eukaryotic translation initiation factor 5A-1); translation initiation factor"	4.43009	5.37346	4.43274	-0.00265513	0.470286	0.940716	0.000258111	214	244	0.185	0.929
AT1G13960	"WRKY4 (WRKY DNA-binding protein 4); transcription factor"	4.82753	4.05475	5.41023	-0.582697	0.000535427	-1.35548	1.25e-06	96.1	113	0.236	0.71
AT1G13970	NA	3.80609	3.70415	4.2745	-0.468414	0.00160389	-0.570353	0.000472126	293	259	-0.182	0.917
AT1G13980	GN (GNOM)	5.28738	5.11153	5.12385	0.163529	0.0477044	-0.0123209	0.326018	7430	7750	0.062	0.935
AT1G13990	NA	8.02456	5.59713	8.90572	-0.881159	0.00018178	-3.30859	1.07e-07	206	284	0.463	0.117
AT1G14000	protein kinase family protein / ankyrin repeat family protein	6.77012	6.54184	7.40122	-0.631099	0.000386215	-0.859379	1.16e-05	3360	3460	0.0433	0.822
AT1G14010	emp24/gp25L/p24 family protein	7.28048	8.11252	7.37644	-0.0959617	0.192663	0.736081	3.75e-05	3780	3890	0.0427	0.973
AT1G14020	NA	4.96047	5.35286	4.94251	0.0179555	0.418894	0.410352	0.000279814	1270	1220	-0.0543	0.849
AT1G14030	ribulose-1,5 bisphosphate carboxylase oxygenase large subunit N-methyltransferase, putative	5.26317	4.66904	4.72187	0.541303	0.00301973	-0.0528323	0.223996	614	686	0.158	0.636
AT1G14040	ATP binding / ATPase, coupled to transmembrane movement of substances	4.52414	4.76954	4.26707	0.257068	0.00935102	0.502465	0.000119489	668	629	-0.0867	0.932
AT1G14048	NA	2.87265	3.04839	2.96269	-0.0900431	0.302794	0.0856968	0.215246	0.242	0.291	0.262	1
AT1G14060	NA	5.28435	6.63956	4.92487	0.359481	0.0085395	1.71469	1.08e-06	1410	841	-0.742	0.000913
AT1G14070	"FUT7 (Fucosyltransferase 7); fucosyltransferase/ transferase, transferring glycosyl groups"	3.81618	3.4948	4.46568	-0.649495	0.000555322	-0.970874	3.48e-05	176	214	0.283	0.622
AT1G14071	"MIR830a; miRNA"	4.17012	4.4821	4.46225	-0.292138	0.0248065	0.0198505	0.34113	0	0	0	0
AT1G14080	"FUT6 (fucosyltransferase 6); fucosyltransferase/ transferase, transferring glycosyl groups"	3.68355	4.25613	3.81855	-0.135007	0.13508	0.437573	0.000481313	109	35.3	-1.62	3.11e-05
AT1G14100	"FUT8 (FUCOSYLTRANSFERASE 8); galactoside 2-alpha-L-fucosyltransferase"	3.68182	3.56605	3.66744	0.0143804	0.439325	-0.101392	0.106857	1.46	0.315	-2.21	0.971
AT1G14110	NA	3.38159	3.36989	3.20249	0.179092	0.0563235	0.167392	0.112581	0	0	0	0
AT1G14120	2-oxoglutarate-dependent dioxygenase, putative	3.28855	3.18975	3.31	-0.0214461	0.423187	-0.120251	0.12491	0	1.49	0	0.928
AT1G14130	2-oxoglutarate-dependent dioxygenase, putative	8.46804	6.57447	9.25909	-0.791052	0.000485705	-2.68462	8.32e-08	2510	2420	-0.0508	1
AT1G14140	mitochondrial substrate carrier family protein	6.31682	6.42321	6.16006	0.15676	0.105554	0.263151	0.0118892	681	627	-0.119	0.997
AT1G14150	oxygen evolving enhancer 3 (PsbQ) family protein	4.47419	4.45215	4.33313	0.141061	0.154493	0.11902	0.119568	2.68	6.93	1.37	0.781
AT1G14160	integral membrane family protein	3.34169	3.29612	3.2463	0.0953915	0.238062	0.0498201	0.251156	0	0	0	0
AT1G14170	KH domain-containing protein	6.15302	5.99317	6.17427	-0.0212514	0.405484	-0.181103	0.0240001	3950	3870	-0.0303	0.898
AT1G14180	unknown protein	5.61917	6.0445	5.1363	0.482872	0.00316418	0.908202	3.59e-05	1340	1190	-0.171	0.371
AT1G14185	glucose-methanol-choline (GMC) oxidoreductase family protein	2.97168	3.02899	2.93772	0.0339667	0.380093	0.0912707	0.163333	1.87	2.57	0.458	1
AT1G14190	glucose-methanol-choline (GMC) oxidoreductase family protein	3.11477	3.10236	3.18247	-0.0676921	0.32583	-0.0801108	0.225895	6.18	9.85	0.674	0.86
AT1G14200	zinc finger (C3HC4-type RING finger) family protein	9.69142	7.57606	9.57022	0.121202	0.322139	-1.99416	2.81e-05	1480	2270	0.615	0.361
AT1G14205	ribosomal protein L18 family protein	4.48632	3.78766	4.13213	0.354184	0.0715646	-0.34447	0.00495041	58.3	47.1	-0.308	0.915
AT1G14210	ribonuclease T2 family protein	6.16679	5.84626	5.5821	0.584683	0.000811201	0.264159	0.028814	755	593	-0.349	0.168
AT1G14220	ribonuclease T2 family protein	4.36789	3.44753	4.71323	-0.345339	0.0430234	-1.26569	3.02e-06	1.3	0	0	0.887
AT1G14230	nucleoside phosphatase family protein / GDA1/CD39 family protein	5.3389	5.48385	5.63853	-0.299635	0.0137007	-0.154682	0.0606664	1890	1970	0.0614	0.756
AT1G14240	nucleoside phosphatase family protein / GDA1/CD39 family protein	5.12884	3.70984	5.19829	-0.0694553	0.213578	-1.48846	3.91e-07	2.76	0.826	-1.74	0.87
AT1G14250	nucleoside phosphatase family protein / GDA1/CD39 family protein	3.48255	3.55054	3.5344	-0.0518492	0.327361	0.0161356	0.326019	0.727	1.6	1.14	1
AT1G14260	zinc finger (C3HC4-type RING finger) family protein	4.57197	4.7396	4.55092	0.0210507	0.408811	0.188683	0.0114374	324	381	0.233	0.469
AT1G14270	CAAX amino terminal protease family protein	6.53363	6.12976	6.30131	0.232323	0.0651788	-0.171547	0.018822	684	827	0.274	0.113
AT1G14280	PKS2 (PHYTOCHROME KINASE SUBSTRATE 2)	3.2758	3.28117	3.34241	-0.0666157	0.24633	-0.0612426	0.178947	3.25	7.39	1.19	0.759
AT1G14290	acid phosphatase, putative	6.66444	7.04771	6.0405	0.623934	0.00167326	1.00721	3.85e-05	1410	1170	-0.262	0.0852
AT1G14300	binding	6.33449	6.39025	5.8321	0.502387	0.00166512	0.558146	0.00029192	1340	960	-0.485	0.000534
AT1G14310	haloacid dehalogenase-like hydrolase family protein	5.56298	5.76593	5.81245	-0.249466	0.0274553	-0.0465237	0.226502	524	535	0.0309	1
AT1G14315	NA	3.44128	3.43653	3.36344	0.0778352	0.29787	0.0730878	0.183732	2.92	0.256	-3.52	0.971
AT1G14320	60S ribosomal protein L10 (RPL10A) / Wilm's tumor suppressor protein-related	9.7668	10.333	9.61353	0.153263	0.088439	0.719476	4.25e-05	59500	43000	-0.469	5.28e-06
AT1G14330	kelch repeat-containing F-box family protein	6.34703	5.70419	7.1302	-0.783169	0.00210233	-1.42601	8.09e-07	1690	1610	-0.0761	0.772
AT1G14340	RNA recognition motif (RRM)-containing protein	7.0121	6.46417	7.15973	-0.147626	0.076548	-0.695552	5.45e-05	411	499	0.281	0.348
AT1G14345	oxidoreductase	7.05467	6.61664	7.0741	-0.0194335	0.415816	-0.457465	0.000548966	668	924	0.469	0.191
AT1G14350	"FLP (FOUR LIPS); DNA binding / transcription factor"	5.15807	5.1103	4.94009	0.217985	0.0277765	0.170219	0.0434353	3110	2830	-0.138	0.738
AT1G14360	"ATUTR3/UTR3 (UDP-GALACTOSE TRANSPORTER 3); pyrimidine nucleotide sugar transmembrane transporter"	6.17862	6.81417	6.04876	0.129858	0.0747801	0.76541	1.34e-05	7120	6330	-0.169	0.187
AT1G14370	"APK2A (PROTEIN KINASE 2A); kinase"	4.8535	3.87844	5.95096	-1.09746	0.000130605	-2.07251	1.01e-07	10.7	22.4	1.06	0.65
AT1G14380	"IQD28; calmodulin binding"	6.72554	7.1259	6.21198	0.513558	0.000633659	0.913924	1.3e-05	11200	12400	0.144	0.417
AT1G14390	leucine-rich repeat transmembrane protein kinase, putative	3.75961	4.39432	3.73311	0.0265019	0.411583	0.661213	0.000122701	1060	793	-0.412	0.00359
AT1G14400	"UBC1 (UBIQUITIN CARRIER PROTEIN 1); ubiquitin-protein ligase"	9.46665	8.89448	9.42863	0.0380245	0.342631	-0.534148	0.000104596	7990	9010	0.173	0.147
AT1G14410	"ATWHY1/PTAC1 (A. THALIANA WHIRLY 1); DNA binding / telomeric DNA binding"	6.65803	7.04766	6.08652	0.571518	0.00254582	0.961147	2.15e-05	1360	1260	-0.109	0.61
AT1G14420	"AT59 (Arabidopsis homolog of tomato LAT59); lyase/ pectate lyase"	3.43438	3.93506	3.40952	0.0248658	0.392126	0.525537	0.00339039	66.1	91.3	0.466	0.364
AT1G14430	glyoxal oxidase-related	4.62129	6.38307	4.43395	0.187339	0.0732724	1.94912	1.46e-06	4620	4610	-0.00216	1
AT1G14440	"ATHB31 (ARABIDOPSIS THALIANA HOMEOBOX PROTEIN 31); transcription factor"	5.69519	5.77603	4.91708	0.778111	0.000566291	0.858957	3.9e-05	727	641	-0.182	0.663
AT1G14450	NA	8.88777	9.65762	8.98819	-0.100426	0.151798	0.669426	2.53e-05	2610	2750	0.0748	0.725
AT1G14455	unknown protein	5.96278	6.58714	6.05693	-0.0941482	0.216642	0.53021	0.000329968	2280	475	-2.26	6.98e-39
AT1G14460	DNA polymerase-related	4.88746	4.46353	5.16981	-0.28235	0.00834874	-0.706276	2.71e-05	6560	5480	-0.257	0.0506
AT1G14470	pentatricopeptide (PPR) repeat-containing protein	3.59683	3.68318	3.58465	0.0121809	0.440207	0.0985317	0.142559	106	98.9	-0.101	0.934
AT1G14480	protein binding	6.08224	5.8428	5.86448	0.217757	0.178256	-0.021681	0.336366	349	504	0.528	0.196
AT1G14490	DNA-binding protein-related	6.45281	6.49509	6.19416	0.25865	0.0376513	0.300929	0.0127213	139	125	-0.154	1
AT1G14500	ankyrin repeat family protein	3.79597	3.76798	3.70258	0.0933946	0.275052	0.0654052	0.209471	2.92	2.42	-0.273	1
AT1G14510	PHD finger family protein	7.9623	7.68146	7.73681	0.225489	0.0260207	-0.0553461	0.199622	3870	3500	-0.144	0.376
AT1G14518	other RNA	3.56903	4.15073	3.37285	0.196179	0.0753491	0.777878	0.00452626	39.5	40.4	0.0336	1
AT1G14520	"MIOX1 (MYO-INISITOL OXYGENASE); oxidoreductase"	6.39812	8.80369	6.5357	-0.137573	0.105317	2.268	1.72e-07	23100	16900	-0.456	1.01e-07
AT1G14530	"(TOM THREE HOMOLOG); virion binding"	6.44032	5.84381	6.74852	-0.308196	0.0320446	-0.904706	2.43e-05	863	902	0.0648	0.931
AT1G14540	anionic peroxidase, putative	3.70213	3.71053	3.91374	-0.211615	0.0497345	-0.203213	0.0337028	1.55	9.83	2.67	0.445
AT1G14549	unknown protein	2.80005	3.17585	3.07817	-0.278115	0.0686697	0.097679	0.174055	0	0	0	0
AT1G14550	anionic peroxidase, putative	3.87416	3.86649	3.78164	0.09252	0.198163	0.0848469	0.191216	0	0	0	0
AT1G14560	mitochondrial substrate carrier family protein	5.73966	5.75233	6.03236	-0.292696	0.0108918	-0.280029	0.00345802	1160	983	-0.238	0.267
AT1G14570	UBX domain-containing protein	7.74762	7.38556	7.84045	-0.0928286	0.184617	-0.454884	0.000307549	7160	7150	-0.00265	1
AT1G14580	zinc finger (C2H2 type) family protein	5.36028	6.69778	5.20862	0.15166	0.0434367	1.48916	4.18e-07	2900	2360	-0.294	0.0237
AT1G14590	NA	5.30896	5.7225	5.22244	0.0865169	0.234165	0.500059	0.0005988	1170	1120	-0.0669	0.921
AT1G14600	DNA binding / transcription factor	4.6357	3.80673	4.50915	0.126545	0.157411	-0.702427	9.39e-05	23.2	42.3	0.867	0.303
AT1G14610	"TWN2 (TWIN 2); ATP binding / aminoacyl-tRNA ligase"	5.80013	6.05075	5.64385	0.156277	0.0717333	0.406893	0.00193275	13900	12200	-0.188	0.0483
AT1G14620	DECOY (endoxyloglucan transferase A2)	7.46103	8.04124	6.67477	0.78626	0.000847623	1.36647	4.93e-06	2550	1980	-0.365	0.0534
AT1G14630	NA	3.54979	3.37167	3.21325	0.336543	0.0108054	0.158426	0.0671843	167	221	0.405	0.155
AT1G14640	SWAP (Suppressor-of-White-APricot)/surp domain-containing protein	3.76305	3.69206	3.75167	0.011375	0.444878	-0.059619	0.232121	153	172	0.168	0.827
AT1G14650	SWAP (Suppressor-of-White-APricot)/surp domain-containing protein / ubiquitin family protein	5.894	5.8775	6.01804	-0.124042	0.0983948	-0.140544	0.0351352	7200	7550	0.069	0.924
AT1G14660	"ATNHX8 (Arabidopsis thaliana Na+/H+ exchanger 8); lithium:hydrogen antiporter/ sodium ion transmembrane transporter/ sodium:hydrogen antiporter"	4.50383	4.27508	4.53089	-0.0270625	0.391615	-0.255813	0.0106717	593	718	0.277	0.266
AT1G14670	endomembrane protein 70, putative	7.43949	7.814	7.55739	-0.117898	0.167045	0.256613	0.00633441	14100	13800	-0.0281	0.982
AT1G14680	NA	4.76025	4.20186	4.91905	-0.1588	0.175364	-0.71719	0.000398502	180	162	-0.148	0.899
AT1G14685	BPC2 (BASIC PENTACYSTEINE 2)	7.45203	7.07502	7.545	-0.0929759	0.169195	-0.469985	0.000148377	3250	3650	0.166	0.259
AT1G14686	epsin N-terminal homology (ENTH) domain-containing protein / clathrin assembly protein-related	3.18368	3.27836	3.30222	-0.118548	0.167517	-0.0238593	0.313141	5.28	4.47	-0.242	1
AT1G14687	"ATHB32 (ARABIDOPSIS THALIANA HOMEOBOX PROTEIN 32); DNA binding / transcription factor"	5.7243	4.9651	5.97761	-0.253315	0.0471492	-1.01251	9.71e-05	163	182	0.16	0.612
AT1G14688	NA	3.45626	3.48563	3.29216	0.164102	0.121965	0.193474	0.0704562	0	0.861	0	1
AT1G14690	NA	6.65505	5.89949	6.31597	0.339084	0.00254997	-0.416479	0.000706474	7610	7610	-0.000165	1
AT1G14700	"ATPAP3/PAP3 (purple acid phosphatase 3); acid phosphatase/ protein serine/threonine phosphatase"	5.18052	3.62318	6.28996	-1.10944	9.4e-05	-2.66677	5.56e-08	39.5	52.7	0.418	0.891
AT1G14710	hydroxyproline-rich glycoprotein family protein	5.76336	6.01487	5.37015	0.393204	0.00157054	0.64472	3.66e-05	7290	7050	-0.0479	0.862
AT1G14720	"XTR2 (XYLOGLUCAN ENDOTRANSGLYCOSYLASE RELATED 2); hydrolase, acting on glycosyl bonds"	6.1633	8.07145	5.28132	0.881979	0.000407167	2.79013	2.18e-07	5080	3940	-0.367	0.000192
AT1G14730	NA	6.32966	6.22354	6.2043	0.125358	0.180899	0.0192335	0.317922	257	225	-0.192	0.641
AT1G14740	NA	6.47233	5.90973	6.40199	0.0703391	0.26317	-0.492259	0.000143493	5560	5780	0.0554	0.919
AT1G14750	"SDS (SOLO DANCERS); cyclin-dependent protein kinase"	3.86308	3.97163	3.79289	0.0701841	0.295288	0.178741	0.0310952	282	309	0.133	0.899
AT1G14755	NA	5.91969	4.96418	6.15799	-0.238305	0.0938259	-1.19381	5.09e-05	80.3	45.9	-0.809	0.291
AT1G14760	DNA binding	3.96685	3.74883	3.9232	0.0436555	0.420547	-0.174362	0.150211	0	0.315	0	1
AT1G14770	zinc ion binding	6.16277	6.22679	5.64008	0.522687	0.00141385	0.586717	0.000312215	1450	1280	-0.183	0.302
AT1G14780	NA	5.07956	4.09807	6.23971	-1.16015	0.000336648	-2.14163	2.3e-07	11.3	18.7	0.731	0.642
AT1G14790	"RDR1 (RNA-DEPENDENT RNA POLYMERASE 1); RNA-directed RNA polymerase/ nucleic acid binding"	5.40966	4.88557	5.48613	-0.0764742	0.218446	-0.600563	3.11e-05	1330	1690	0.35	0.0195
AT1G14800	NA	3.40527	3.45572	3.60197	-0.196693	0.183626	-0.146247	0.167404	0	0	0	0
AT1G14810	semialdehyde dehydrogenase family protein	6.82012	7.68258	6.20859	0.611533	0.000503068	1.474	9.26e-07	2630	1810	-0.541	3.99e-07
AT1G14820	SEC14 cytosolic factor family protein / phosphoglyceride transfer family protein	7.69015	7.4469	7.16277	0.527382	0.00643047	0.284132	0.0115934	2110	2210	0.0629	0.909
AT1G14830	"ADL1C/ADL5 (DYNAMIN-LIKE PROTEIN 5); GTP binding / GTPase"	6.01654	6.30211	6.10956	-0.0930139	0.161778	0.192555	0.0178618	10800	10400	-0.0579	0.776
AT1G14840	"ATMAP70-4 (microtubule-associated proteins 70-4); microtubule binding"	5.51947	6.17306	4.88272	0.636746	0.000414799	1.29034	9.98e-07	3760	4100	0.126	0.497
AT1G14850	NUP155 (Nucleoporin 155)	5.03119	5.0016	4.66836	0.362829	0.0023757	0.33324	0.00112591	5580	4990	-0.162	0.114
AT1G14860	"ATNUDT18 (Arabidopsis thaliana Nudix hydrolase homolog 18); hydrolase"	3.62985	3.47883	3.58753	0.0423151	0.365669	-0.108702	0.0929001	10.5	3.36	-1.64	0.579
AT1G14870	NA	6.19362	5.00538	7.12431	-0.930692	0.00147885	-2.11894	2.38e-06	40.1	58.9	0.554	0.45
AT1G14880	NA	3.20884	3.26611	3.31995	-0.111112	0.248465	-0.0538471	0.265077	0	0	0	0
AT1G14890	pectinesterase inhibitor	8.20129	6.46526	7.94978	0.251514	0.0118787	-1.48452	5.49e-07	2210	2870	0.376	0.00102
AT1G14900	"HMGA (HIGH MOBILITY GROUP A); DNA binding"	8.66018	8.55447	8.20795	0.452227	0.00096847	0.346516	0.000681499	8740	10600	0.275	0.0175
AT1G14910	epsin N-terminal homology (ENTH) domain-containing protein	5.96196	6.0148	5.94442	0.0175426	0.421488	0.0703889	0.172274	5150	5490	0.0933	0.825
AT1G14920	"GAI (GA INSENSITIVE); transcription factor"	6.95958	6.85274	6.18795	0.771625	0.000727148	0.664787	0.000445739	2930	3060	0.061	0.839
AT1G14930	major latex protein-related / MLP-related	3.40905	3.55861	3.44004	-0.0309938	0.420686	0.118568	0.201115	0	0	0	0
AT1G14940	major latex protein-related / MLP-related	3.72702	3.75039	3.84235	-0.115334	0.195324	-0.0919628	0.193593	0	0	0	0
AT1G14950	major latex protein-related / MLP-related	3.60412	3.65994	3.53989	0.0642297	0.324464	0.120047	0.122102	0	0.605	0	1
AT1G14960	major latex protein-related / MLP-related	3.6803	3.9843	3.64688	0.0334231	0.380099	0.33742	0.021754	0	0	0	0
AT1G14970	NA	5.28511	5.51231	5.30676	-0.0216501	0.420096	0.205554	0.0132416	3780	3430	-0.142	0.534
AT1G14980	CPN10 (CHAPERONIN 10)	9.00149	10.289	8.37331	0.628179	0.00264841	1.91566	5.84e-07	7790	6060	-0.362	0.00336
AT1G14990	NA	5.8443	6.84121	5.86946	-0.0251588	0.411233	0.971751	2.18e-06	722	761	0.0753	0.993
AT1G15000	"SCPL50 (serine carboxypeptidase-like 50); serine carboxypeptidase"	8.01519	7.0673	8.08942	-0.0742295	0.195947	-1.02212	2.04e-06	1980	1960	-0.0184	0.993
AT1G15010	NA	7.05499	5.10681	7.84623	-0.791237	0.000353415	-2.73942	0.000174001	68	171	1.33	0.00494
AT1G15015	NA	2.96455	2.9972	3.08169	-0.117137	0.310819	-0.0844949	0.263606	0.326	1.57	2.27	1
AT1G15020	"ATQSOX1/QSO2 (QUIESCIN-SULFHYDRYL OXIDASE 1); thiol-disulfide exchange intermediate"	5.53128	5.33594	5.39386	0.13742	0.0622944	-0.0579248	0.192189	1760	1780	0.0205	1
AT1G15030	NA	6.4534	6.70427	6.63561	-0.182213	0.0356218	0.0686583	0.153151	1920	1800	-0.0898	0.749
AT1G15040	glutamine amidotransferase-related	5.92383	5.00179	6.16809	-0.244262	0.0642742	-1.1663	5.42e-05	218	165	-0.402	0.391
AT1G15045	NA	3.68487	3.86617	4.25901	-0.574131	0.0501729	-0.392833	0.0512738	0	0	0	0
AT1G15050	"IAA34 (indoleacetic acid-induced protein 34); transcription factor"	4.1068	4.05626	4.21944	-0.112631	0.133941	-0.163177	0.174489	9.98	11.2	0.167	1
AT1G15060	NA	5.66748	5.75283	5.59793	0.0695496	0.212373	0.154899	0.0410086	1780	2060	0.212	0.146
AT1G15080	"ATPAP2 (PHOSPHATIDIC ACID PHOSPHATASE 2); phosphatidate phosphatase"	4.79961	4.83454	4.41215	0.387464	0.00147605	0.422393	0.000819808	122	126	0.0508	1
AT1G15100	"RHA2A (RING-H2 finger A2A); protein binding / zinc ion binding"	9.01419	7.48786	9.53933	-0.525139	0.000908541	-2.05148	1.86e-07	483	765	0.665	0.00313
AT1G15110	phosphatidyl serine synthase family protein	6.50582	5.88713	7.04285	-0.537031	0.000504371	-1.15572	4.46e-06	1640	1450	-0.176	0.561
AT1G15120	ubiquinol-cytochrome C reductase complex 7.8 kDa protein, putative / mitochondrial hinge protein, putative	8.6099	9.36146	8.44457	0.165329	0.0744361	0.916894	1.76e-05	6790	5660	-0.262	0.0443
AT1G15125	S-adenosylmethionine-dependent methyltransferase	4.7058	4.80812	4.70766	-0.00185367	0.470178	0.100465	0.208822	54.8	74.7	0.445	0.853
AT1G15130	hydroxyproline-rich glycoprotein family protein	6.42471	6.23005	6.49609	-0.0713809	0.20926	-0.266038	0.00262747	6720	7720	0.201	0.148
AT1G15140	oxidoreductase NAD-binding domain-containing protein	6.39423	7.11045	6.82958	-0.435354	0.000992431	0.28087	0.00952028	1570	1440	-0.12	0.553
AT1G15150	MATE efflux family protein	4.07266	4.19065	4.31981	-0.247149	0.0292107	-0.129164	0.0944312	3.89	99	4.67	9.29e-16
AT1G15160	MATE efflux family protein	3.50212	3.26622	3.27033	0.231786	0.168813	-0.00410909	0.351911	96.4	118	0.295	0.876
AT1G15165	U-box domain-containing protein	4.2182	4.11937	4.04635	0.171853	0.162272	0.0730138	0.198975	65.4	64.4	-0.0231	1
AT1G15170	MATE efflux family protein	3.88122	4.65098	4.00904	-0.127824	0.126569	0.641938	0.000159347	675	848	0.329	0.193
AT1G15175	other RNA	3.67546	3.95432	3.79907	-0.12361	0.138174	0.155252	0.152347	4.14	4.09	-0.0168	1
AT1G15180	MATE efflux family protein	3.62819	3.59191	3.89156	-0.263365	0.0707535	-0.299643	0.00290634	42.2	26.4	-0.676	0.567
AT1G15190	NA	4.83566	5.07204	4.80886	0.0268008	0.417742	0.263182	0.0117731	57.9	80.8	0.481	0.487
AT1G15200	protein-protein interaction regulator family protein	7.12851	6.6482	6.65814	0.470369	0.00222654	-0.00994061	0.332317	4450	4700	0.0782	0.831
AT1G15210	"ATPDR7/PDR7 (PLEIOTROPIC DRUG RESISTANCE 7); ATPase, coupled to transmembrane movement of substances"	3.58111	3.66522	3.50042	0.0806909	0.192725	0.164797	0.0390214	419	426	0.0268	1
AT1G15215	NA	6.21532	5.94966	5.65499	0.560327	0.00222984	0.294669	0.0218905	1040	1070	0.0486	0.977
AT1G15220	"ATCCMH; oxidoreductase"	6.20418	5.77008	5.99335	0.210831	0.0519085	-0.223267	0.0292479	533	514	-0.0514	0.904
AT1G15230	NA	7.11338	6.77011	6.90939	0.203993	0.0411704	-0.13928	0.0702479	1270	1680	0.406	0.000942
AT1G15240	phox (PX) domain-containing protein	4.8357	4.83233	5.13064	-0.294942	0.138414	-0.298307	0.0781048	4460	4640	0.0569	0.896
AT1G15250	60S ribosomal protein L37 (RPL37A)	7.53971	7.93003	6.83707	0.702635	0.00330392	1.09296	8.05e-05	735	612	-0.264	0.398
AT1G15260	NA	5.70597	5.52175	4.79099	0.914975	0.000385634	0.730753	0.000519206	516	670	0.376	0.131
AT1G15270	NA	8.15971	8.41309	8.34561	-0.185905	0.0319314	0.0674761	0.189144	7710	6470	-0.254	0.217
AT1G15280	glycine-rich protein	6.0186	5.7791	5.83862	0.179976	0.0305438	-0.0595166	0.200738	4700	4950	0.0735	0.873
AT1G15290	binding	4.28658	4.19237	4.23204	0.0545407	0.292621	-0.0396733	0.25555	1510	1420	-0.0866	0.807
AT1G15300	transposable element gene	4.53785	4.33037	4.56225	-0.0244022	0.407147	-0.231888	0.0255922	793	892	0.17	0.551
AT1G15310	"ATHSRP54A (Arabidopsis thaliana signal recognition particle 54kDa A); 7S RNA binding / GTP binding / mRNA binding"	5.44325	5.81807	5.67781	-0.234561	0.0298838	0.140254	0.04244	2010	2160	0.108	0.776
AT1G15320	NA	4.01399	4.08677	3.94151	0.0724783	0.286416	0.145253	0.0709348	7.06	5.71	-0.306	0.984
AT1G15330	CBS domain-containing protein	4.85055	4.30207	4.31036	0.540194	0.00118759	-0.0082894	0.336152	2.27	2.03	-0.166	1
AT1G15340	"MBD10 (methyl-CpG-binding domain 10); DNA binding"	8.14925	6.7972	8.25172	-0.102475	0.205456	-1.45452	1.41e-06	4270	5870	0.458	3.59e-06
AT1G15350	NA	6.90318	5.54248	7.78543	-0.88225	0.000197633	-2.24295	2.78e-07	348	347	-0.00264	1
AT1G15360	"SHN1/WIN1 (SHINE1); DNA binding / transcription factor"	3.8119	4.01645	4.02518	-0.213285	0.0967687	-0.00873672	0.342021	0	0.291	0	1
AT1G15370	NA	8.09557	8.61036	8.27859	-0.183013	0.0572608	0.331776	0.00190003	2340	2380	0.0253	1
AT1G15380	lactoylglutathione lyase family protein / glyoxalase I family protein	9.49782	5.66822	10.1151	-0.617324	0.00661333	-4.44692	1.7e-07	31.5	41.7	0.404	0.779
AT1G15385	unknown protein	3.17491	3.00535	3.06779	0.107117	0.226663	-0.0624379	0.226454	0	0	0	0
AT1G15390	"PDF1A (PEPTIDE DEFORMYLASE 1A); peptide deformylase"	6.84609	7.18574	6.47801	0.368079	0.00264608	0.707732	1.45e-05	801	701	-0.193	0.466
AT1G15400	NA	9.67102	8.42551	10.0313	-0.360298	0.00175776	-1.60581	3.86e-07	1080	1380	0.344	0.0124
AT1G15410	aspartate-glutamate racemase family	5.21979	4.91043	4.76696	0.452828	0.00195287	0.143468	0.0676883	754	820	0.122	0.711
AT1G15415	NA	4.34322	4.40141	4.21055	0.132663	0.257762	0.190859	0.143068	7.23	4.21	-0.779	0.812
AT1G15420	NA	7.53233	7.7905	6.65406	0.878266	0.000312017	1.13644	1.11e-05	2990	2110	-0.503	7.22e-07
AT1G15430	NA	6.93885	7.14335	7.41462	-0.475771	0.00225841	-0.271273	0.0604275	1010	1180	0.221	0.865
AT1G15440	transducin family protein / WD-40 repeat family protein	5.91791	6.49846	5.31197	0.605941	0.000421393	1.18649	2.48e-06	2800	1880	-0.573	2.38e-06
AT1G15460	"ATBOR4/BOR4; anion exchanger"	4.63636	5.03249	4.31537	0.320992	0.00732778	0.717117	2.52e-05	472	456	-0.0505	0.917
AT1G15470	transducin family protein / WD-40 repeat family protein	5.68206	6.52739	5.47649	0.205572	0.0685626	1.0509	6.08e-06	1640	1500	-0.129	0.552
AT1G15480	DNA binding	5.2341	5.65585	4.67868	0.555422	0.000563004	0.977178	4.48e-06	1880	1450	-0.373	0.00495
AT1G15490	hydrolase, alpha/beta fold family protein	5.52502	5.73918	5.44462	0.0803994	0.229514	0.294554	0.00410542	1680	1500	-0.163	0.587
AT1G15500	"ATNTT2; ATP:ADP antiporter"	7.75468	7.42317	7.22639	0.528295	0.000943733	0.196789	0.0585533	12700	10900	-0.215	0.0199
AT1G15510	pentatricopeptide (PPR) repeat-containing protein	4.1106	4.44001	4.0261	0.0844988	0.221821	0.413911	0.0013883	517	401	-0.367	0.0935
AT1G15520	"ATPDR12/PDR12 (PLEIOTROPIC DRUG RESISTANCE 12); ATPase, coupled to transmembrane movement of substances"	3.78183	3.93356	3.85686	-0.0750241	0.214463	0.0767037	0.149146	73.4	72.1	-0.027	1
AT1G15530	receptor lectin kinase, putative	5.90184	5.78541	5.91875	-0.0169126	0.424181	-0.133348	0.064462	1080	1270	0.228	0.231
AT1G15540	oxidoreductase, 2OG-Fe(II) oxygenase family protein	3.34768	3.52488	3.30728	0.0404023	0.379053	0.217598	0.0221127	0.326	0.605	0.894	1
AT1G15550	"GA4 (GA REQUIRING 4); gibberellin 3-beta-dioxygenase"	4.96238	5.23753	4.83852	0.123862	0.190038	0.399007	0.00233712	396	242	-0.713	0.259
AT1G15560	transposable element gene	3.21609	3.36065	3.23994	-0.0238428	0.434422	0.120714	0.142882	0	0.256	0	1
AT1G15570	"CYCA2;3 (CYCLIN A2;3); cyclin-dependent protein kinase regulator"	5.01811	5.02437	4.42735	0.590763	0.000692845	0.597022	0.000111376	1900	1690	-0.171	0.273
AT1G15580	"IAA5 (indoleacetic acid-induced protein 5); transcription factor"	3.76983	3.77979	3.7344	0.0354269	0.365669	0.0453832	0.246164	0.969	0.57	-0.765	1
AT1G15590	NA	3.56756	3.60922	3.57129	-0.00372688	0.465137	0.0379299	0.287639	0	0	0	0
AT1G15600	NA	3.6403	3.68398	3.74566	-0.105352	0.126961	-0.0616732	0.184547	0	0	0	0
AT1G15610	NA	3.80674	3.99666	3.96502	-0.158281	0.107733	0.0316395	0.263503	2.92	0	0	0.866
AT1G15620	NA	3.74911	3.5591	4.14192	-0.392812	0.0246508	-0.582819	0.000496024	1.3	0	0	0.887
AT1G15630	NA	3.16615	3.22058	3.32535	-0.159208	0.115329	-0.104772	0.143497	0	0	0	0
AT1G15640	NA	3.8902	3.99383	3.90218	-0.0119768	0.448392	0.0916538	0.142836	0	0	0	0
AT1G15660	NA	4.9362	4.98265	4.82806	0.108148	0.154382	0.154594	0.0623473	3380	3260	-0.0527	0.929
AT1G15670	kelch repeat-containing F-box family protein	8.18178	5.7042	9.44657	-1.26478	0.000219798	-3.74237	2.54e-07	53.9	86.8	0.689	0.414
AT1G15680	F-box family protein	3.73149	3.68454	3.78973	-0.0582422	0.308324	-0.10519	0.0805263	0	0.511	0	1
AT1G15690	"AVP1 (vacuolar-type H+-pumping pyrophosphatase 1); ATPase"	8.81711	9.22293	9.17309	-0.35598	0.00930768	0.0498344	0.269733	83100	73500	-0.177	0.069
AT1G15700	ATPC2 (ATP synthase gamma chain 2)	6.29817	6.5526	5.68782	0.610347	0.00236773	0.864775	8.98e-05	1120	1040	-0.111	0.733
AT1G15710	prephenate dehydrogenase family protein	6.02953	6.94541	5.72224	0.307297	0.0094344	1.22317	3.8e-06	2150	1930	-0.149	0.366
AT1G15720	"TRFL5 (TRF-LIKE 5); DNA binding / transcription factor"	5.04626	5.0982	4.86556	0.180693	0.065659	0.232635	0.00543571	591	526	-0.167	0.485
AT1G15730	PRLI-interacting factor L, putative	5.40353	5.38694	5.16617	0.237359	0.0251494	0.22077	0.0187175	1020	1040	0.0363	0.943
AT1G15740	leucine-rich repeat family protein	7.93169	5.97774	8.09513	-0.163442	0.042691	-2.11739	1.41e-07	3220	4930	0.615	1.2e-05
AT1G15750	"TPL/WSIP1 (WUS-INTERACTING PROTEIN 1); protein binding"	6.25624	5.84542	6.51492	-0.258677	0.0215795	-0.6695	7.9e-05	13700	13900	0.0201	1
AT1G15757	NA	5.3453	5.85363	5.05502	0.290281	0.0660594	0.798612	1.02e-05	0	0	0	0
AT1G15760	NA	4.34585	4.70723	4.10241	0.24344	0.0508092	0.60482	0.00617174	98.1	78.3	-0.324	0.935
AT1G15770	NA	3.38307	3.39542	3.33471	0.048354	0.363579	0.0607052	0.253166	1.45	8.15	2.49	0.553
AT1G15772	NA	3.88703	3.3776	3.51002	0.377014	0.0342674	-0.132419	0.170507	62	50.1	-0.307	0.887
AT1G15780	protein binding / transcription cofactor	5.04927	5.07844	5.30664	-0.25737	0.0142137	-0.228194	0.0112197	4970	5560	0.161	0.418
AT1G15790	NA	3.94107	4.36389	3.97644	-0.0353682	0.390362	0.387445	0.00231889	110	97.9	-0.164	1
AT1G15800	NA	7.16574	5.11776	7.31528	-0.149541	0.117693	-2.19753	4.22e-07	149	238	0.669	0.467
AT1G15810	ribosomal protein S15 family protein	6.21471	6.7242	5.85733	0.357386	0.00416429	0.86688	1.87e-05	3460	3280	-0.0742	0.777
AT1G15820	"LHCB6 (LIGHT HARVESTING COMPLEX PSII); chlorophyll binding"	9.21031	8.21464	8.95142	0.258898	0.0148626	-0.736779	1.02e-05	4540	5500	0.277	0.0136
AT1G15825	hydroxyproline-rich glycoprotein family protein	4.32786	4.32882	4.70536	-0.377495	0.0577538	-0.376541	0.0294999	1.29	0.291	-2.16	0.94
AT1G15830	unknown protein	5.26411	5.23877	5.05704	0.207071	0.0529752	0.18173	0.0856949	2.92	11.3	1.95	0.419
AT1G15840	unknown protein	4.69309	4.56625	4.6232	0.0698968	0.276484	-0.0569431	0.204075	1.87	1.69	-0.149	1
AT1G15850	transducin family protein / WD-40 repeat family protein	3.84843	3.66604	3.79743	0.0510062	0.393274	-0.131388	0.160067	0	0	0	0
AT1G15860	calcium ion binding	6.17259	6.18132	6.57258	-0.399992	0.00149513	-0.391266	0.000566039	2050	1840	-0.154	0.444
AT1G15870	mitochondrial glycoprotein family protein / MAM33 family protein	5.81585	6.09621	5.28755	0.528294	0.00413129	0.808654	0.000119306	264	192	-0.462	0.0439
AT1G15880	"GOS11 (GOLGI SNARE 11); SNARE binding"	7.30912	6.72982	7.21546	0.0936644	0.213379	-0.485637	0.00082858	1880	2140	0.185	0.151
AT1G15885	unknown protein	3.4376	3.40204	3.55327	-0.115666	0.230212	-0.151225	0.144841	139	144	0.0472	0.891
AT1G15890	disease resistance protein (CC-NBS-LRR class), putative	3.45719	3.51132	3.47824	-0.0210499	0.407897	0.0330781	0.253363	43.9	51.3	0.226	0.968
AT1G15900	NA	5.41648	5.3507	5.51904	-0.102555	0.179957	-0.168337	0.0530323	9.25	8.62	-0.103	1
AT1G15910	XH/XS domain-containing protein / XS zinc finger domain-containing protein	5.81872	5.70004	5.72196	0.0967629	0.321703	-0.0219202	0.328449	4300	4410	0.0379	0.927
AT1G15920	CCR4-NOT transcription complex protein, putative	7.67548	7.14955	7.84571	-0.170235	0.0773283	-0.696167	0.000107354	1650	1600	-0.0401	1
AT1G15930	40S ribosomal protein S12 (RPS12A)	10.4617	10.6042	9.69683	0.764864	0.000455886	0.90739	2.71e-05	18100	13100	-0.473	2.95e-06
AT1G15940	binding	5.34747	5.07064	5.2112	0.136276	0.114482	-0.140556	0.0604478	12700	11900	-0.0904	0.575
AT1G15950	CCR1 (CINNAMOYL COA REDUCTASE 1)	8.17946	7.53513	8.93571	-0.756243	0.000403965	-1.40058	1.33e-06	2330	2550	0.126	0.643
AT1G15960	"NRAMP6 (NRAMP metal ion transporter 6); metal ion transmembrane transporter"	4.24327	4.79909	4.68856	-0.44528	0.00121353	0.110534	0.120873	106	145	0.446	0.345
AT1G15970	methyladenine glycosylase family protein	6.06838	6.33786	5.76117	0.307211	0.0055161	0.576691	4.18e-05	2910	3150	0.118	0.51
AT1G15980	NA	4.0762	4.16475	4.20187	-0.125678	0.0876449	-0.0371242	0.268553	35.6	70.4	0.985	0.0321
AT1G15990	"ATCNGC7 (CYCLIC NUCLEOTIDE GATED CHANNEL 7); calmodulin binding / cyclic nucleotide binding / ion channel"	3.32594	3.19658	3.26025	0.0656928	0.296228	-0.0636678	0.219815	3.25	1.2	-1.44	1
AT1G16000	NA	7.30384	8.78785	6.71492	0.588915	0.00117043	2.07292	2.23e-07	777	641	-0.277	0.118
AT1G16010	magnesium transporter CorA-like family protein (MRS2-1)	7.66598	7.51921	8.22444	-0.558456	0.000776535	-0.705225	3.54e-05	3280	3320	0.0189	0.984
AT1G16020	NA	5.0993	5.45981	4.82822	0.271084	0.013071	0.631591	6.14e-05	2110	2100	-0.00719	1
AT1G16022	unknown protein	4.78345	5.1405	4.84812	-0.0646731	0.296964	0.292381	0.00477952	19.2	25.9	0.436	0.892
AT1G16025	unknown protein	4.87071	5.02811	4.95067	-0.0799643	0.344443	0.0774428	0.153385	1.22	0.546	-1.15	1
AT1G16030	"HSP70B (heat shock protein 70B); ATP binding"	4.57165	4.7904	4.34868	0.222961	0.0647663	0.441711	0.00525434	803	1020	0.343	0.493
AT1G16040	NA	6.92087	7.0559	6.90397	0.0169089	0.428272	0.151937	0.038665	1600	1600	0.0029	1
AT1G16060	ovule development protein, putative	4.86735	6.78059	4.81195	0.0554045	0.326769	1.96864	3.8e-07	1020	794	-0.364	0.00931
AT1G16070	"AtTLP8 (TUBBY LIKE PROTEIN 8); transcription factor"	3.73406	3.73147	3.51292	0.22114	0.0306707	0.218546	0.0129775	117	144	0.295	0.637
AT1G16080	NA	6.32574	6.40148	6.12751	0.198228	0.0805341	0.273968	0.0134949	1540	1690	0.135	0.529
AT1G16090	WAKL7 (WALL ASSOCIATED KINASE-LIKE 7)	4.63725	3.8685	4.38838	0.248871	0.0457304	-0.519885	0.000346112	57.1	85.2	0.579	0.305
AT1G16110	"WAKL6 (WALL ASSOCIATED KINASE-LIKE 6); kinase"	3.27907	3.27047	3.64401	-0.364946	0.0217168	-0.373543	0.00831365	3.25	0.861	-1.92	1
AT1G16120	"WAKL1 (WALL ASSOCIATED KINASE-LIKE 1); kinase"	3.20331	3.23866	3.45154	-0.248227	0.0246595	-0.212882	0.0261733	7.63	8.05	0.0776	1
AT1G16130	"WAKL2 (WALL ASSOCIATED KINASE-LIKE 2); kinase"	4.22371	3.99354	4.88589	-0.66218	0.000276343	-0.892345	1.61e-05	43.5	43.4	-0.00307	1
AT1G16150	"WAKL4 (WALL ASSOCIATED KINASE-LIKE 4); kinase"	3.71249	3.75322	4.08118	-0.368697	0.00837772	-0.327968	0.00698942	0.81	0.802	-0.0151	1
AT1G16160	"WAKL5 (WALL ASSOCIATED KINASE-LIKE 5); kinase"	3.48997	3.56514	3.59822	-0.108251	0.108251	-0.0330782	0.263351	11	1.73	-2.67	0.847
AT1G16170	NA	7.24331	7.509	7.53556	-0.292251	0.00941628	-0.0265577	0.271345	654	680	0.0563	0.928
AT1G16180	TMS membrane family protein / tumour differentially expressed (TDE) family protein	8.76424	8.52988	8.87204	-0.107798	0.12237	-0.342166	0.00141808	9380	10400	0.153	0.342
AT1G16190	DNA repair protein RAD23, putative	5.69881	6.28512	5.38301	0.315805	0.00955788	0.902113	8.62e-06	3820	3270	-0.223	0.0283
AT1G16210	NA	7.89498	7.81647	8.05416	-0.159178	0.0579629	-0.237692	0.0125911	3500	3750	0.102	0.497
AT1G16220	protein phosphatase 2C family protein / PP2C family protein	4.20253	4.89444	3.96778	0.234759	0.0519531	0.926667	7.44e-05	775	681	-0.187	0.489
AT1G16225	NA	3.28246	3.26712	3.38366	-0.101201	0.230353	-0.116538	0.176316	0	0.256	0	1
AT1G16230	syntaxin-related family protein	2.78761	2.82514	2.6987	0.088917	0.172185	0.126443	0.0914647	0	0	0	0
AT1G16240	SYP51 (SYNTAXIN OF PLANTS 51)	8.86113	8.22091	8.81711	0.0440153	0.317678	-0.596197	6.98e-05	3540	4060	0.196	0.112
AT1G16250	kelch repeat-containing F-box family protein	5.86104	5.40678	5.95332	-0.0922881	0.192065	-0.546546	8.43e-05	637	759	0.251	0.964
AT1G16260	protein kinase family protein	3.52094	3.54376	3.49362	0.0273203	0.396099	0.0501372	0.229014	24.6	57.2	1.22	0.157
AT1G16270	protein kinase family protein	4.16338	3.98688	4.15058	0.012804	0.431476	-0.163696	0.0246008	891	977	0.133	0.841
AT1G16280	DEAD/DEAH box helicase, putative	5.75695	6.24718	5.47358	0.28337	0.0110021	0.773602	1.82e-05	1200	930	-0.37	0.0108
AT1G16290	NA	3.88095	4.15117	3.87662	0.00433447	0.464815	0.274547	0.00814793	297	166	-0.842	0.367
AT1G16300	"GAPCP-2; glyceraldehyde-3-phosphate dehydrogenase"	4.52985	4.96665	4.45303	0.0768181	0.24098	0.513616	0.000156594	1590	1280	-0.321	0.0331
AT1G16310	cation efflux family protein	6.43036	4.58289	7.87774	-1.44738	0.000170786	-3.29485	1.18e-06	15	23	0.612	0.615
AT1G16320	NA	6.75158	6.03384	7.02099	-0.269414	0.00900035	-0.987153	4.35e-06	754	821	0.123	0.691
AT1G16330	"CYCB3;1 (CYCLIN B3;1); cyclin-dependent protein kinase"	3.52059	3.74842	3.41747	0.103117	0.184639	0.330946	0.00250975	1090	956	-0.185	0.415
AT1G16340	"ATKDSA2/ATKSDA; 3-deoxy-8-phosphooctulonate synthase"	6.62395	7.00555	5.87613	0.747821	0.000598004	1.12943	3.61e-06	2010	1970	-0.0323	1
AT1G16350	inosine-5'-monophosphate dehydrogenase, putative	7.26881	7.9117	6.52045	0.74836	0.000946126	1.39124	5.85e-06	3950	3490	-0.18	0.175
AT1G16360	LEM3 (ligand-effect modulator 3) family protein / CDC50 family protein	3.52387	3.39111	3.57413	-0.050259	0.317394	-0.183017	0.045177	1.54	2.38	0.628	1
AT1G16370	"ATOCT6; carbohydrate transmembrane transporter/ sugar:hydrogen ion symporter"	3.81828	3.67073	3.87575	-0.0574706	0.323005	-0.205014	0.0254174	159	240	0.596	0.773
AT1G16380	"ATCHX1 (CATION/H+ EXCHANGER 1); monovalent cation:proton antiporter"	3.36456	3.48316	3.40125	-0.0366828	0.366011	0.081918	0.156621	2.11	2.17	0.0464	1
AT1G16390	"ATOCT3 (ARABIDOPSIS THALIANA ORGANIC CATION/CARNITINE TRANSPORTER2); carbohydrate transmembrane transporter/ sugar:hydrogen ion symporter"	5.09146	8.69989	4.60988	0.481576	0.00158618	4.09001	3.01e-08	4930	3280	-0.587	0.00204
AT1G16400	"CYP79F2 (cytochrome P450, family 79, subfamily F, polypeptide 2); oxygen binding"	3.4213	3.22495	3.55293	-0.131625	0.124953	-0.327974	0.00198666	0.242	0.256	0.0772	1
AT1G16410	CYP79F1 (SUPERSHOOT 1)	3.25446	3.52863	3.45394	-0.199478	0.0587002	0.0746849	0.200823	0	0	0	0
AT1G16420	"ATMC8 (METACASPASE 8); caspase"	3.1415	3.20967	3.10543	0.0360649	0.367387	0.104235	0.124024	0	0.256	0	1
AT1G16430	surfeit locus protein 5 family protein / SURF5 family protein	5.78074	6.12887	5.15866	0.622082	0.00158175	0.970216	2.48e-05	588	569	-0.0481	0.986
AT1G16440	protein kinase, putative	3.47602	3.55226	3.56647	-0.090441	0.197562	-0.0142023	0.321903	8.43	5.94	-0.504	0.919
AT1G16445	methylase-related	4.55247	4.58397	4.15137	0.401105	0.00201755	0.432608	0.00183521	73	53.8	-0.44	0.716
AT1G16460	"ATRDH2 (ARABIDOPSIS THALIANA RHODANESE HOMOLOGUE 2); thiosulfate sulfurtransferase"	7.11058	6.82962	6.84528	0.265297	0.0158259	-0.015657	0.305488	5050	5850	0.212	0.139
AT1G16470	"PAB1 (PROTEASOME SUBUNIT PAB1); peptidase"	7.06613	7.31953	7.29457	-0.228439	0.0294831	0.0249677	0.276152	7500	7060	-0.0872	0.551
AT1G16480	NA	4.05982	4.28871	3.81385	0.24597	0.0287025	0.474862	0.000582372	465	468	0.0101	1
AT1G16489	other RNA	3.57406	3.61441	3.49143	0.0826282	0.30588	0.122985	0.247695	22.3	12.9	-0.788	0.758
AT1G16490	"AtMYB58 (myb domain protein 58); DNA binding / transcription factor"	3.66923	3.53376	3.41593	0.253304	0.0352932	0.117834	0.079457	90.4	89.8	-0.00939	1
AT1G16500	NA	7.58691	7.46478	7.19984	0.38707	0.00139622	0.264937	0.00347778	2020	2170	0.105	0.614
AT1G16510	auxin-responsive family protein	7.95693	6.09222	8.15558	-0.198654	0.020021	-2.06336	3.47e-07	252	213	-0.243	0.76
AT1G16515	unknown protein	3.98459	3.33679	3.52924	0.455357	0.036666	-0.192452	0.134879	5.43	3.1	-0.806	0.833
AT1G16520	NA	6.90713	6.77651	6.1734	0.733733	0.000969696	0.603111	0.00045005	3010	2950	-0.0295	1
AT1G16530	ASL9/LBD3 (LOB DOMAIN-CONTAINING PROTEIN 3)	3.82588	3.81443	4.02696	-0.201079	0.0179535	-0.212531	0.0147968	0	3.02	0	0.616
AT1G16540	"ABA3/ATABA3/LOS5/SIR3 (ABA DEFICIENT 3); Mo-molybdopterin cofactor sulfurase/ selenocysteine lyase"	4.71621	4.38184	5.13606	-0.419858	0.00107121	-0.754229	1.77e-05	1250	1240	-0.0158	1
AT1G16560	Per1-like family protein	7.40634	7.09017	7.61754	-0.211201	0.0346671	-0.527378	0.000210338	3240	3220	-0.008	1
AT1G16570	glycosyl transferase family 1 protein	5.91862	5.98446	5.73952	0.179104	0.0538192	0.244944	0.00857573	1750	1820	0.0596	0.94
AT1G16590	"REV7 (Reversionless 7); DNA binding"	5.88914	5.84031	5.60113	0.288014	0.0542912	0.239181	0.0181756	518	639	0.303	0.338
AT1G16610	"SR45 (arginine/serine-rich 45); RNA binding"	6.68543	7.12885	6.49011	0.195324	0.0278786	0.638746	3e-05	7990	7640	-0.0646	0.607
AT1G16630	NA	3.50819	3.73932	3.48251	0.025678	0.388749	0.25681	0.00402897	2510	2400	-0.0658	0.698
AT1G16640	transcriptional factor B3 family protein	4.35646	4.88601	4.01297	0.343491	0.0351691	0.873041	9.86e-05	112	90.2	-0.313	0.675
AT1G16650	NA	4.81298	5.09952	4.52426	0.28872	0.0199613	0.575252	8.21e-05	438	378	-0.213	0.547
AT1G16660	transposable element gene	3.51981	3.60007	3.44389	0.0759235	0.305569	0.156182	0.0859065	0.242	0.291	0.262	1
AT1G16670	protein kinase family protein	5.79695	5.359	6.06839	-0.271443	0.0149871	-0.709394	7.83e-05	538	589	0.131	0.783
AT1G16680	DNAJ heat shock N-terminal domain-containing protein / S-locus protein, putative	5.88342	5.50433	5.51776	0.365659	0.00193631	-0.0134336	0.320067	2580	2630	0.0266	0.916
AT1G16690	transcription factor-related	4.79726	4.95243	4.67837	0.11889	0.141832	0.274058	0.00824253	859	881	0.0366	1
AT1G16700	"ATMLO14 (ARABIDOPSIS THALIANA MILDEW RESISTANCE LOCUS O 14); NADH dehydrogenase (ubiquinone)"	6.26836	6.87783	6.4052	-0.136843	0.119649	0.47263	0.000377358	4190	4110	-0.027	1
AT1G16705	p300/CBP acetyltransferase-related protein-related	9.20731	8.25591	9.64885	-0.441544	0.00146329	-1.39294	3.44e-07	6920	6530	-0.0823	0.87
AT1G16710	"HAC12 (HISTONE ACETYLTRANSFERASE OF THE CBP FAMILY 12); H3/H4 histone acetyltransferase/ transcription cofactor"	4.67518	4.57272	4.78328	-0.108096	0.157268	-0.210556	0.0181938	5090	5580	0.133	0.672
AT1G16720	"HCF173 (HIGH CHLOROPHYLL FLUORESCENCE PHENOTYPE 173); binding / catalytic/ oxidoreductase/ transcription repressor"	5.70917	5.51576	5.69176	0.0174096	0.414344	-0.176005	0.0141774	1460	2020	0.463	0.0001
AT1G16730	NA	4.31165	4.18279	4.32671	-0.0150618	0.435819	-0.143926	0.0606431	66.9	67.1	0.00536	0.982
AT1G16740	ribosomal protein L20 family protein	8.85409	9.64371	8.71011	0.14398	0.0968732	0.933599	4.32e-06	2050	1880	-0.12	0.626
AT1G16750	NA	4.95376	6.06948	4.42037	0.533394	0.00100197	1.64911	2.87e-07	3370	3290	-0.0347	1
AT1G16760	protein kinase family protein	3.34313	3.43413	3.42191	-0.0787804	0.236706	0.0122165	0.333696	0	1.59	0	0.892
AT1G16770	NA	4.10028	4.16633	4.10196	-0.00167713	0.469093	0.0643787	0.20939	15.6	18.2	0.225	1
AT1G16780	vacuolar-type H+-translocating inorganic pyrophosphatase, putative	5.58299	6.06587	5.25249	0.3305	0.00459399	0.813383	1.37e-05	3180	3270	0.0382	1
AT1G16790	ribosomal protein-related	6.96177	7.26394	7.15732	-0.195556	0.0461315	0.10661	0.105356	685	673	-0.0246	1
AT1G16800	tRNA-splicing endonuclease positive effector-related	3.94919	3.90634	3.96249	-0.0132909	0.437478	-0.0561454	0.213165	1610	1680	0.0673	1
AT1G16810	NA	9.00308	8.64059	9.06186	-0.0587777	0.287701	-0.421271	0.000322162	2740	2760	0.0127	1
AT1G16820	vacuolar ATP synthase catalytic subunit-related / V-ATPase-related / vacuolar proton pump-related	5.98711	5.40252	5.76631	0.220802	0.186267	-0.363792	0.00690052	212	233	0.137	0.86
AT1G16830	pentatricopeptide (PPR) repeat-containing protein	4.47453	4.95608	4.13844	0.336093	0.0133868	0.817647	2.16e-05	253	191	-0.405	0.318
AT1G16840	NA	7.64689	7.31353	7.84654	-0.199644	0.0405169	-0.533005	0.000277353	1200	1510	0.331	0.492
AT1G16850	unknown protein	4.37086	3.94161	3.93056	0.440293	0.0269984	0.0110491	0.3324	16.7	29	0.793	0.495
AT1G16870	mitochondrial 28S ribosomal protein S29-related	6.63478	7.54063	6.0891	0.545678	0.00120867	1.45153	2.83e-06	2680	2140	-0.325	0.00338
AT1G16880	uridylyltransferase-related	6.83849	6.80608	7.51563	-0.67714	0.000646506	-0.70955	2e-05	2360	2450	0.0555	0.831
AT1G16890	"UBC13B/UBC36 (UBIQUITIN-CONJUGATING ENZYME 36); protein binding / ubiquitin-protein ligase"	7.66344	7.12902	8.01025	-0.346815	0.00678442	-0.881229	1.1e-05	6270	5870	-0.0951	0.806
AT1G16900	sugar binding / transferase, transferring glycosyl groups	6.54214	6.84214	6.74038	-0.198245	0.0309751	0.101761	0.126553	5250	5040	-0.0604	0.812
AT1G16905	sugar binding	3.5316	3.56776	3.55118	-0.0195873	0.436568	0.0165749	0.32481	0	0	0	0
AT1G16910	NA	4.65206	3.54457	3.96393	0.688124	0.00160673	-0.419358	0.00443689	8.2	4.28	-0.939	0.957
AT1G16916	NA	6.63758	6.57586	6.47678	0.160801	0.149446	0.0990828	0.179614	334	347	0.0568	0.852
AT1G16920	"RAB11 (ARABIDOPSIS RAB GTPASE HOMOLOG A1B); GTP binding"	9.02204	8.9609	8.43499	0.587051	0.00254061	0.525908	0.00124363	3580	3670	0.0356	0.906
AT1G16930	F-box family protein	4.20771	4.55296	4.78315	-0.575431	0.000404237	-0.230188	0.00765665	155	188	0.279	0.829
AT1G16940	F-box family protein	3.38694	3.41854	3.4933	-0.106366	0.190854	-0.0747656	0.163034	0.242	0	0	1
AT1G16950	unknown protein	10.845	8.46602	11.7696	-0.924568	0.000250108	-3.30354	2.87e-07	24.9	21.8	-0.189	1
AT1G16960	NA	4.33779	4.37181	5.03919	-0.701394	0.00214905	-0.667377	3.88e-05	131	140	0.0995	0.922
AT1G16970	"ATKU70/KU70 (ARABIDOPSIS THALIANA KU70 HOMOLOG); double-stranded DNA binding / protein binding"	5.20729	5.15172	4.89254	0.314753	0.00724396	0.259178	0.00547934	1800	1620	-0.156	0.329
AT1G16980	"ATTPS2 (Arabidopsis thaliana trehalose-phosphatase/synthase 2); transferase, transferring glycosyl groups"	3.28916	4.4803	3.34426	-0.0551018	0.336241	1.13603	1.13e-05	18.5	4.95	-1.9	0.132
AT1G17000	"ATTPS3 (Arabidopsis thaliana trehalose-phosphatase/synthase 3); alpha,alpha-trehalose-phosphate synthase (UDP-forming)"	2.97268	3.39321	2.91819	0.0544927	0.309773	0.475021	0.000279796	89	0	0	9.43e-25
AT1G17010	oxidoreductase, 2OG-Fe(II) oxygenase family protein	4.35799	3.84253	5.52174	-1.16375	0.000182473	-1.67921	1.59e-06	0	0	0	0
AT1G17020	"SRG1 (SENESCENCE-RELATED GENE 1); oxidoreductase, acting on paired donors, with incorporation or reduction of molecular oxygen, 2-oxoglutarate as one donor, and incorporation of one atom each of oxygen into both donors"	7.02123	4.60523	8.96617	-1.94494	0.000176831	-4.36094	1.07e-06	17.2	16.6	-0.0498	1
AT1G17030	NA	6.62351	4.3799	7.91542	-1.29191	0.000436958	-3.53552	3.53e-07	33.7	68.3	1.02	0.074
AT1G17040	transcription factor-related	5.29645	4.86897	5.35093	-0.0544789	0.279633	-0.481963	0.000472492	1310	1450	0.138	0.549
AT1G17050	"SPS2 (SOLANESYL DIPHOSPHATE SYNTHASE 2); dimethylallyltranstransferase/ trans-octaprenyltranstransferase"	5.1024	4.88108	5.12453	-0.0221328	0.41655	-0.243451	0.0332738	724	691	-0.0679	1
AT1G17060	"CYP72C1 (cytochrome P450, family 72, subfamily C, polypeptide 1); oxygen binding"	4.65604	4.17073	4.83933	-0.183292	0.0296904	-0.668601	2.11e-05	183	149	-0.297	0.642
AT1G17070	D111/G-patch domain-containing protein	5.3205	5.62092	5.37123	-0.0507333	0.305532	0.249682	0.00690859	2130	1930	-0.143	0.504
AT1G17080	NA	8.8349	8.86878	9.07261	-0.237708	0.0210555	-0.203826	0.0217706	2070	2170	0.0664	0.755
AT1G17090	unknown protein	4.91127	6.43915	4.38443	0.526842	0.0183355	2.05472	1e-05	177	153	-0.206	0.592
AT1G17100	SOUL heme-binding family protein	7.47038	8.4191	7.66608	-0.195697	0.0206584	0.75302	8.06e-06	2010	2420	0.265	0.381
AT1G17110	"UBP15 (UBIQUITIN-SPECIFIC PROTEASE 15); ubiquitin-specific protease"	5.56649	5.28418	5.49864	0.0678483	0.267805	-0.214458	0.0215464	6490	6760	0.0587	0.876
AT1G17120	"CAT8 (CATIONIC AMINO ACID TRANSPORTER 8); cationic amino acid transmembrane transporter"	6.96813	6.98029	6.93491	0.0332136	0.368905	0.0453801	0.234279	2400	2460	0.0327	0.995
AT1G17130	cell cycle control protein-related	5.87426	6.18512	6.18988	-0.315623	0.00418984	-0.00476088	0.3424	3200	3040	-0.0746	0.714
AT1G17140	tropomyosin-related	5.6189	5.14046	5.52716	0.0917414	0.267219	-0.386706	0.00166847	872	824	-0.0816	1
AT1G17145	protein binding / zinc ion binding	6.59339	5.55067	6.61083	-0.0174352	0.427541	-1.06016	2.42e-06	1260	1310	0.0487	0.887
AT1G17147	NA	4.06419	3.35975	4.57138	-0.507192	0.00308494	-1.21163	6.91e-05	0.242	0.546	1.17	1
AT1G17150	glycoside hydrolase family 28 protein / polygalacturonase (pectinase) family protein	3.39379	3.73199	3.46039	-0.0666002	0.324186	0.271594	0.0133519	12.3	14.4	0.231	1
AT1G17160	pfkB-type carbohydrate kinase family protein	6.30611	6.5104	6.35035	-0.0442458	0.345912	0.160044	0.0284642	1650	1410	-0.235	0.126
AT1G17170	"ATGSTU24 (ARABIDOPSIS THALIANA GLUTATHIONE S-TRANSFERASE (CLASS TAU) 24); glutathione transferase"	3.9425	4.099	4.62647	-0.683969	0.00235775	-0.527469	0.00289692	538	444	-0.279	0.69
AT1G17180	"ATGSTU25 (Arabidopsis thaliana Glutathione S-transferase (class tau) 25); glutathione transferase"	3.29676	3.28151	3.59462	-0.297861	0.0177308	-0.313113	0.00983694	0.326	0.291	-0.164	1
AT1G17190	"ATGSTU26 (Arabidopsis thaliana Glutathione S-transferase (class tau) 26); glutathione transferase"	7.20596	5.41479	6.82216	0.383793	0.00225031	-1.40737	3.13e-06	1380	1670	0.275	0.109
AT1G17200	integral membrane family protein	9.95689	10.0809	9.36515	0.591737	0.000961911	0.715759	5.84e-05	12300	14200	0.203	0.0923
AT1G17210	zinc ion binding	6.24523	5.85083	6.09312	0.152119	0.0738482	-0.242288	0.0110639	9260	9500	0.0375	1
AT1G17220	"FUG1 (FU-GAERI1); translation initiation factor"	5.3884	5.04292	5.37957	0.00882691	0.449915	-0.336645	0.00259858	3780	4250	0.17	0.241
AT1G17230	protein binding / protein kinase	3.5183	3.47154	3.61056	-0.0922679	0.189294	-0.139019	0.0701919	382	404	0.0793	0.911
AT1G17235	RTFL11 (ROTUNDIFOLIA LIKE 11)	3.68436	3.63815	3.60174	0.0826233	0.261125	0.0364129	0.29933	10.7	17.3	0.691	0.921
AT1G17240	leucine-rich repeat family protein	3.63026	3.60598	3.67285	-0.0425899	0.341627	-0.0668748	0.219901	44.4	46.1	0.0522	1
AT1G17250	leucine-rich repeat family protein	4.00575	5.52183	3.94416	0.0615866	0.266822	1.57767	4.61e-07	0	0	0	0
AT1G17255	other RNA	3.67026	3.77117	3.61424	0.0560156	0.269509	0.156925	0.0380171	55.8	53.9	-0.0508	1
AT1G17260	"AHA10 (AUTOINHIBITED H(+)-ATPASE ISOFORM 10); ATPase"	5.28069	7.27499	4.97216	0.308533	0.0118409	2.30283	3.19e-07	41700	40700	-0.0333	0.894
AT1G17270	NA	4.33239	4.38949	4.33207	0.000321461	0.473623	0.0574239	0.237122	603	562	-0.103	0.82
AT1G17280	"UBC34 (UBIQUITIN-CONJUGATING ENZYME 34); ubiquitin-protein ligase"	6.96161	6.74034	7.15846	-0.196853	0.062954	-0.418123	0.00310931	2130	2280	0.0956	0.709
AT1G17285	NA	2.80097	3.06489	2.94182	-0.140851	0.211452	0.123067	0.159817	2.2	0	0	0.657
AT1G17290	"ALAAT1 (ALANINE AMINOTRANSFERAS); alanine transaminase"	6.49949	6.80803	6.64739	-0.147903	0.0612505	0.16064	0.0548945	10400	10200	-0.0199	0.882
AT1G17300	NA	3.78341	3.57957	3.6554	0.128013	0.148378	-0.0758261	0.169426	5.52	7.09	0.361	1
AT1G17310	MADS-box protein (AGL100)	3.7652	3.65714	4.17435	-0.409149	0.00533324	-0.517213	0.000921304	0.894	5.23	2.55	0.673
AT1G17330	metal-dependent phosphohydrolase HD domain-containing protein-related	5.41675	4.90644	5.35407	0.0626835	0.341937	-0.447623	0.000488017	853	965	0.179	0.512
AT1G17340	phosphoinositide phosphatase family protein	4.28344	4.00386	4.4743	-0.190853	0.0237366	-0.470437	0.000240423	403	516	0.357	0.25
AT1G17345	auxin-responsive protein-related	3.31992	3.55013	3.58848	-0.26856	0.0759626	-0.038346	0.305988	0	0	0	0
AT1G17350	auxin-induced-related / indole-3-acetic acid induced-related	6.38058	6.02033	6.06138	0.319205	0.0095127	-0.0410509	0.226502	985	1070	0.113	0.878
AT1G17360	COP1-interacting protein-related	4.23575	4.06313	4.26474	-0.0289876	0.372948	-0.20161	0.0103451	1890	2040	0.108	0.892
AT1G17370	"UBP1B (OLIGOURIDYLATE BINDING PROTEIN 1B); mRNA 3'-UTR binding"	7.2457	6.86263	7.03527	0.210429	0.0244068	-0.172642	0.0303856	4510	4830	0.0992	0.585
AT1G17380	JAZ5/TIFY11A (JASMONATE-ZIM-DOMAIN PROTEIN 5)	4.60572	5.37357	4.34122	0.264495	0.220435	1.03235	0.00352374	923	1320	0.517	0.673
AT1G17390	transposable element gene	3.10114	3.07309	3.2817	-0.180552	0.255017	-0.208604	0.194099	2.92	1.43	-1.03	1
AT1G17400	NA	3.80751	3.2937	3.96924	-0.161725	0.13238	-0.675544	0.000186678	26.8	47.7	0.835	0.447
AT1G17410	nucleoside diphosphate kinase family protein	6.40867	5.80161	5.92298	0.485697	0.0114547	-0.121365	0.133014	373	390	0.064	0.902
AT1G17420	"LOX3 (Lipoxygenase 3); iron ion binding / lipoxygenase/ metal ion binding / oxidoreductase, acting on single donors with incorporation of molecular oxygen, incorporation of two atoms of oxygen"	4.64465	5.44917	4.46805	0.176605	0.222732	0.981116	0.000323183	6590	9270	0.493	0.725
AT1G17430	hydrolase, alpha/beta fold family protein	5.82277	7.02531	5.00649	0.81628	0.000312474	2.01881	3.85e-07	2110	1820	-0.214	0.279
AT1G17440	"EER4/TAF12B (TBP-ASSOCIATED FACTOR 12B); transcription initiation factor"	5.78344	5.87341	5.95402	-0.17058	0.086716	-0.0806113	0.171262	4680	4870	0.0571	0.916
AT1G17450	ATP phosphoribosyltransferase -related	3.93018	3.9645	3.91413	0.0160468	0.418116	0.0503662	0.194706	3070	3220	0.0687	0.881
AT1G17455	ELF4-L4 (ELF4-LIKE 4)	5.97253	5.5189	5.67598	0.296551	0.00512695	-0.157084	0.0346523	556	478	-0.217	0.498
AT1G17460	"TRFL3 (TRF-LIKE 3); DNA binding / transcription factor"	4.67317	4.58437	4.4699	0.203277	0.0454525	0.114471	0.0922381	946	903	-0.067	0.892
AT1G17470	"ATDRG1 (ARABIDOPSIS THALIANA DEVELOPMENTALLY REGULATED G-PROTEIN 1); GTP binding"	7.03323	7.02679	6.84683	0.186404	0.0401431	0.17996	0.0223586	3470	3170	-0.132	0.459
AT1G17480	"IQD7 (IQ-domain 7); calmodulin binding"	4.39332	4.72014	4.63484	-0.24152	0.0225708	0.0852974	0.154657	369	373	0.0172	1
AT1G17490	NA	7.06218	7.14422	7.20519	-0.143019	0.0728566	-0.0609781	0.207933	817	842	0.0426	0.889
AT1G17495	transposable element gene	2.90972	2.98698	2.93277	-0.0230434	0.402432	0.0542167	0.200555	0	0	0	0
AT1G17500	ATPase, coupled to transmembrane movement of ions, phosphorylative mechanism	4.82586	4.91717	5.00307	-0.177204	0.0319283	-0.0859	0.175053	3600	3690	0.0333	1
AT1G17510	unknown protein	7.42058	7.81893	7.18639	0.234195	0.0524766	0.632541	0.000132394	780	832	0.0919	0.79
AT1G17520	DNA-binding protein, putative	6.13399	5.24285	5.94314	0.190847	0.0545631	-0.700291	4.43e-05	944	1050	0.15	0.542
AT1G17530	"ATTIM23-1 (TRANSLOCASE OF INNER MITOCHONDRIAL MEMBRANE 23); P-P-bond-hydrolysis-driven protein transmembrane transporter"	9.42321	8.81653	9.06084	0.362375	0.00216138	-0.244302	0.00643509	1820	2120	0.221	0.223
AT1G17540	kinase	3.57563	3.75014	3.52744	0.0481922	0.28386	0.2227	0.0103629	31.6	15.8	-1	0.493
AT1G17545	protein phosphatase 2C-related / PP2C-related	4.09414	4.13801	4.27733	-0.183195	0.136907	-0.139325	0.0969953	1.3	0	0	0.887
AT1G17550	"HAB2 (Homology to ABI2); protein serine/threonine phosphatase"	6.00874	5.27726	6.16268	-0.153936	0.109137	-0.885421	0.000154979	2980	3720	0.318	0.0767
AT1G17560	"HLL (HUELLENLOS); structural constituent of ribosome"	7.18281	8.64347	6.74072	0.442096	0.00572726	1.90275	4.14e-07	2040	1500	-0.443	0.000298
AT1G17580	"MYA1 (ARABIDOPSIS MYOSIN); motor/ protein binding"	4.50505	4.15191	4.62412	-0.119074	0.130781	-0.472208	0.000390729	2160	2300	0.0921	0.859
AT1G17590	CCAAT-binding transcription factor (CBF-B/NF-YA) family protein	5.77127	5.13506	5.8581	-0.0868211	0.334688	-0.723033	2.92e-05	591	743	0.33	0.104
AT1G17600	disease resistance protein (TIR-NBS-LRR class), putative	3.45276	3.59951	3.50712	-0.054358	0.292814	0.0923892	0.118279	12.1	9.37	-0.368	1
AT1G17610	disease resistance protein-related	3.40502	3.41171	3.34743	0.0575874	0.321058	0.0642756	0.220075	1.21	0.546	-1.15	0.993
AT1G17615	disease resistance protein (TIR-NBS class), putative	3.43176	3.43051	3.44513	-0.0133735	0.442845	-0.0146208	0.325145	0	0	0	0
AT1G17620	NA	9.05278	9.76702	9.62766	-0.574878	0.00127808	0.139362	0.0729215	13200	14300	0.124	0.485
AT1G17630	pentatricopeptide (PPR) repeat-containing protein	3.88189	3.97566	3.84164	0.0402457	0.339085	0.134013	0.0336928	183	165	-0.151	0.833
AT1G17640	RNA recognition motif (RRM)-containing protein	6.40345	5.75869	6.24944	0.15401	0.0887625	-0.490755	0.000528774	530	544	0.0381	0.928
AT1G17650	phosphogluconate dehydrogenase (decarboxylating)	5.67695	5.78252	5.03323	0.643724	0.00216915	0.749296	0.000120765	887	906	0.03	0.989
AT1G17665	NA	4.87121	4.57234	4.66156	0.20965	0.0173982	-0.0892215	0.15035	238	174	-0.454	0.627
AT1G17680	transcription factor-related	5.48907	5.13454	5.57723	-0.0881609	0.196147	-0.442691	0.00068463	2270	2480	0.13	0.682
AT1G17690	NA	4.91116	5.23177	4.65465	0.256507	0.0153944	0.577125	9.36e-05	2230	1740	-0.36	0.00299
AT1G17700	prenylated rab acceptor (PRA1) family protein	3.89741	3.97746	4.04442	-0.14701	0.0982789	-0.0669561	0.253449	0	0	0	0
AT1G17710	phosphoric monoester hydrolase	4.68138	3.82075	4.41912	0.26226	0.037843	-0.598368	0.000535035	2.18	16	2.88	0.159
AT1G17720	"ATB BETA (Arabidopsis thaliana serine/threonine protein phosphatase 2A 55 kDa regulatory subunit B beta isofor); nucleotide binding"	6.1288	6.20064	6.46893	-0.340134	0.0162583	-0.268291	0.0146178	8670	7560	-0.198	0.156
AT1G17730	VPS46.1	8.23487	8.16943	8.29207	-0.0571973	0.277014	-0.12264	0.0785537	2980	3210	0.109	0.684
AT1G17744	unknown protein	4.45623	4.11263	4.74335	-0.287123	0.0147826	-0.630721	0.000212978	20	27.7	0.467	0.962
AT1G17745	"PGDH (3-PHOSPHOGLYCERATE DEHYDROGENASE); phosphoglycerate dehydrogenase"	8.49166	8.74644	8.65053	-0.158866	0.0567294	0.0959161	0.172502	31300	34000	0.121	0.539
AT1G17750	leucine-rich repeat transmembrane protein kinase, putative	3.95994	4.62003	3.90039	0.059552	0.257648	0.719635	4.47e-05	2560	2910	0.186	0.829
AT1G17760	"ATCSTF77/CSTF77 (Cleavage stimulation factor 77); protein binding"	4.78032	4.81558	4.64211	0.138208	0.0968164	0.17347	0.0356073	2930	2850	-0.0387	0.925
AT1G17770	"SUVH7 (SU(VAR)3-9 HOMOLOG 7); histone-lysine N-methyltransferase/ zinc ion binding"	3.39321	3.61652	3.37781	0.0153985	0.43355	0.238707	0.0416607	14.8	5.35	-1.47	0.338
AT1G17780	NA	5.06107	4.46625	4.78204	0.279033	0.0978014	-0.315792	0.0378426	141	107	-0.401	0.527
AT1G17790	DNA-binding bromodomain-containing protein	5.57775	5.11982	5.66043	-0.0826836	0.234484	-0.540606	0.000354127	969	1160	0.261	0.3
AT1G17800	plastocyanin-like domain-containing protein	3.77042	5.30535	3.75681	0.0136118	0.446013	1.54855	3.94e-06	34.6	0	0	2.37e-09
AT1G17810	"BETA-TIP (BETA-TONOPLAST INTRINSIC PROTEIN); water channel"	4.0657	4.07691	4.00196	0.0637377	0.292581	0.0749497	0.174074	11	5.79	-0.92	0.75
AT1G17820	NA	4.24256	4.23671	4.35258	-0.110024	0.170071	-0.115866	0.0947062	1170	1230	0.0775	1
AT1G17830	NA	5.13449	3.70301	4.69568	0.438803	0.00485694	-0.992676	2.38e-05	275	304	0.143	0.966
AT1G17840	"ABCG11/COF1/DSO/WBC11 (DESPERADO); ATPase, coupled to transmembrane movement of substances"	6.77577	7.56451	6.60679	0.168979	0.0532403	0.957719	2.46e-05	31700	29700	-0.0912	0.497
AT1G17850	NA	4.86169	4.75376	4.48574	0.375946	0.00507174	0.268013	0.00722676	517	563	0.125	0.768
AT1G17860	trypsin and protease inhibitor family protein / Kunitz family protein	6.60584	5.65797	6.4686	0.137242	0.208863	-0.810631	3.8e-05	1690	1900	0.176	0.522
AT1G17870	ATEGY3	4.19974	4.03333	3.9836	0.216136	0.043032	0.0497316	0.247497	415	524	0.334	0.242
AT1G17880	nascent polypeptide-associated complex (NAC) domain-containing protein / BTF3b-like transcription factor, putative	7.86816	8.51656	7.40096	0.467202	0.00386094	1.1156	6.65e-06	14100	10500	-0.428	2.98e-06
AT1G17890	"GER2; catalytic"	5.07142	5.82319	4.90043	0.170998	0.0361863	0.922768	8.38e-06	2910	2890	-0.0092	1
AT1G17910	wall-associated kinase, putative	3.28178	3.36272	3.25227	0.0295061	0.367978	0.11045	0.102536	0	0	0	0
AT1G17920	"HDG12 (HOMEODOMAIN GLABROUS12); transcription factor"	3.78392	4.07238	3.75886	0.0250507	0.391369	0.313519	0.0020293	312	302	-0.0441	1
AT1G17930	NA	6.11321	5.87328	5.91927	0.193939	0.0420708	-0.0459911	0.228854	1730	1760	0.0274	1
AT1G17940	NA	5.03511	5.1371	4.88222	0.152896	0.0566924	0.254883	0.00590491	1610	1880	0.223	0.749
AT1G17950	"MYB52 (myb domain protein 52); DNA binding / transcription factor"	3.28318	3.38079	3.36221	-0.0790263	0.262101	0.0185867	0.314509	0.974	1.42	0.543	1
AT1G17960	threonyl-tRNA synthetase, putative / threonine--tRNA ligase, putative	3.77769	6.06166	3.78898	-0.0112878	0.44724	2.27268	1.96e-07	31.4	31.4	0.000663	1
AT1G17970	zinc finger (C3HC4-type RING finger) family protein	5.24613	4.8644	4.92356	0.322576	0.00654241	-0.0591512	0.216002	196	256	0.386	0.246
AT1G17980	nucleotidyltransferase family protein	6.0412	6.04798	6.07725	-0.0360541	0.345679	-0.0292718	0.258972	2450	2660	0.12	0.722
AT1G18030	protein phosphatase 2C, putative / PP2C, putative	5.59962	5.50167	5.41836	0.181263	0.106137	0.083311	0.176021	439	487	0.152	0.693
AT1G18040	"AT;CDCKD;3/CAK2AT/CDKD1;3 (CYCLIN-DEPENDENT KINASE D1;3); kinase/ protein kinase"	5.84211	6.0648	5.80212	0.0399996	0.389124	0.262681	0.00970718	1530	1450	-0.0779	0.783
AT1G18050	SWAP (Suppressor-of-White-APricot)/surp domain-containing protein	3.88627	3.83205	4.05612	-0.169846	0.203716	-0.224069	0.064402	0.242	0	0	1
AT1G18060	NA	6.37831	6.67548	6.03922	0.339087	0.00416064	0.63626	5.62e-05	539	771	0.515	0.143
AT1G18070	EF-1-alpha-related GTP-binding protein, putative	6.50702	6.99189	6.40766	0.0993575	0.129858	0.584232	0.000330934	14900	12600	-0.243	0.0108
AT1G18075	"MIR159/MIR159B; miRNA"	6.40473	6.80627	6.25289	0.151844	0.190417	0.553378	0.000603013	36	38.6	0.0985	1
AT1G18080	"ATARCA (Arabidopsis thaliana Homolog of the Tobacco ArcA); nucleotide binding"	10.8894	11.6707	10.2865	0.602913	0.00057141	1.38422	1.37e-06	40500	32500	-0.318	0.000639
AT1G18090	exonuclease, putative	4.3111	4.77116	4.00008	0.311019	0.00781326	0.77108	1.3e-05	647	552	-0.23	0.289
AT1G18100	"E12A11; phosphatidylethanolamine binding"	3.82701	3.75106	3.78222	0.0447932	0.313377	-0.0311605	0.292685	4.96	1.28	-1.95	1
AT1G18130	tRNA synthetase-related / tRNA ligase-related	3.40453	3.30356	3.28298	0.121549	0.182772	0.0205815	0.30555	0	0.315	0	1
AT1G18140	"LAC1 (Laccase 1); copper ion binding / oxidoreductase"	3.63872	3.81514	3.4315	0.20722	0.0168465	0.383638	0.00130112	17.4	17.1	-0.0263	0.99
AT1G18150	"ATMPK8 (ARABIDOPSIS THALIANA MAP KINASE 8); MAP kinase"	5.63059	5.9765	5.58257	0.0480217	0.32327	0.393926	0.00121729	3060	2750	-0.155	0.488
AT1G18160	protein kinase family protein	5.65258	5.24708	5.7167	-0.0641203	0.297136	-0.469615	0.000714658	4610	4560	-0.0156	0.977
AT1G18170	immunophilin / FKBP-type peptidyl-prolyl cis-trans isomerase family protein	5.74965	5.0711	5.75519	-0.00554651	0.460182	-0.684096	6.34e-05	108	128	0.245	0.687
AT1G18180	oxidoreductase, acting on the CH-CH group of donors	5.69016	6.16398	5.38487	0.30529	0.00943123	0.77911	3.89e-05	1080	1330	0.301	0.0879
AT1G18190	GC2 (GOLGIN CANDIDATE 2)	4.9307	5.15841	5.20084	-0.27014	0.00758483	-0.0424229	0.243255	2850	3060	0.104	0.758
AT1G18200	"AtRABA6b (Arabidopsis Rab GTPase homolog A6b); GTP binding"	4.32588	3.97569	4.38877	-0.0628881	0.386906	-0.41308	0.0114759	305	446	0.55	0.49
AT1G18210	calcium-binding protein, putative	9.77433	9.95433	10.0643	-0.290016	0.00724716	-0.110021	0.110711	7940	10200	0.367	0.0465
AT1G18210	calcium-binding protein, putative	9.97432	10.1813	10.302	-0.327706	0.00445111	-0.12073	0.0982648	7940	10200	0.367	0.0465
AT1G18220	ATPUP9 (Arabidopsis thaliana purine permease 9)	3.14956	3.25961	3.14905	0.000507759	0.473449	0.110563	0.115088	0	0	0	0
AT1G18250	ATLP-1 (Arabidopsis thaumatin-like protein 1)	6.932	7.43547	5.94269	0.989313	0.000137625	1.49279	1.12e-06	7790	8490	0.124	0.483
AT1G18260	suppressor of lin-12-like protein-related / sel-1 protein-related	6.53123	6.26075	6.37528	0.155944	0.0474953	-0.114532	0.0632111	5290	5590	0.0811	0.77
AT1G18265	NA	3.40867	3.49431	3.37258	0.0360894	0.358711	0.121734	0.0519862	12.6	12.5	-0.0206	1
AT1G18270	ketose-bisphosphate aldolase class-II family protein	5.2574	4.60509	5.58158	-0.324181	0.00690298	-0.976487	5.61e-06	4220	4630	0.135	0.588
AT1G18280	protease inhibitor/seed storage/lipid transfer protein (LTP) family protein	6.06897	4.32919	6.06505	0.00391734	0.466738	-1.73586	4.53e-06	18.8	29.4	0.649	0.564
AT1G18290	NA	3.80884	3.77398	3.83739	-0.0285503	0.427614	-0.0634103	0.257538	0	0.57	0	1
AT1G18300	"ATNUDT4 (Arabidopsis thaliana Nudix hydrolase homolog 4); hydrolase"	6.93312	6.56605	6.32094	0.612175	0.00742827	0.245111	0.20876	1720	2380	0.468	0.0133
AT1G18310	glycosyl hydrolase family 81 protein	3.72596	3.70834	3.77166	-0.0457021	0.359066	-0.0633218	0.183842	9.89	19.4	0.971	0.726
AT1G18330	"EPR1 (EARLY-PHYTOCHROME-RESPONSIVE1); DNA binding / transcription factor"	6.45392	5.34633	5.99449	0.459435	0.058823	-0.648159	0.00940738	231	267	0.21	0.984
AT1G18335	GCN5-related N-acetyltransferase (GNAT) family protein	5.04711	4.86145	4.91427	0.13283	0.20096	-0.0528228	0.246973	669	682	0.0287	0.926
AT1G18340	basal transcription factor complex subunit-related	5.6242	6.04375	5.17242	0.45178	0.00741728	0.871334	5.51e-05	928	940	0.0187	1
AT1G18350	"ATMKK7 (MAP KINASE KINASE7); kinase"	5.08281	4.64518	5.20005	-0.117239	0.216538	-0.554864	0.000788239	174	226	0.378	0.221
AT1G18360	hydrolase, alpha/beta fold family protein	5.74888	5.75678	5.69413	0.0547421	0.277863	0.0626516	0.165934	1780	1750	-0.0235	1
AT1G18370	"HIK (HINKEL); microtubule motor"	3.58132	3.99392	3.50029	0.0810333	0.257492	0.493627	0.00068392	5110	5090	-0.00516	0.909
AT1G18382	other RNA	3.12119	3.19011	3.1283	-0.00711583	0.460279	0.0618086	0.237676	0	0	0	0
AT1G18390	protein kinase family protein	4.49698	4.13465	4.5885	-0.0915168	0.267719	-0.453855	0.00167146	69.2	50.2	-0.464	0.826
AT1G18400	"BEE1 (BR ENHANCED EXPRESSION 1); transcription factor"	3.68772	3.64081	3.78426	-0.0965447	0.228964	-0.14345	0.0788381	12	2.6	-2.21	0.21
AT1G18410	kinesin motor protein-related	3.30535	3.39034	3.39296	-0.0876114	0.213391	-0.00261926	0.351097	99.6	128	0.368	0.535
AT1G18415	other RNA	4.09793	4.18115	3.9371	0.160836	0.0932509	0.244048	0.0111174	647	656	0.0192	0.892
AT1G18420	NA	3.56045	3.68911	3.50476	0.0556969	0.301036	0.184352	0.0257421	67.1	48.6	-0.466	0.617
AT1G18440	peptidyl-tRNA hydrolase family protein	5.00569	5.19122	4.87975	0.125939	0.137615	0.311468	0.00191722	375	353	-0.0864	0.958
AT1G18450	"ATARP4 (ACTIN-RELATED PROTEIN 4); structural constituent of cytoskeleton"	6.94471	6.49014	6.43698	0.507729	0.00144898	0.053155	0.210773	5680	5900	0.0558	0.947
AT1G18460	lipase family protein	5.95217	4.9343	5.71747	0.234701	0.0393437	-0.783178	5.68e-05	508	786	0.631	0.00141
AT1G18470	zinc finger (C3HC4-type RING finger) family protein	6.36553	5.67918	6.82225	-0.45672	0.00689339	-1.14307	1.41e-05	1200	1390	0.211	0.282
AT1G18480	calcineurin-like phosphoesterase family protein	7.27561	7.2831	7.66763	-0.392027	0.00147416	-0.384534	0.0007341	1360	1260	-0.114	0.554
AT1G18485	pentatricopeptide (PPR) repeat-containing protein	3.90293	3.76122	3.8518	0.0511259	0.318979	-0.0905807	0.0917591	215	227	0.0786	1
AT1G18486	NA	5.39646	3.23888	5.49384	-0.0973808	0.327023	-2.25496	1.96e-06	0.568	1.92	1.76	1
AT1G18490	NA	6.08561	6.01606	5.80614	0.279467	0.0201437	0.209914	0.0189187	1050	1290	0.291	0.0909
AT1G18500	"IPMS1/MAML-4 (METHYLTHIOALKYLMALATE SYNTHASE-LIKE 4); 2-isopropylmalate synthase"	5.80255	5.93442	5.50813	0.294424	0.00645785	0.426292	0.000299685	3190	2930	-0.121	0.448
AT1G18510	TET16 (TETRASPANIN16)	3.69004	3.7449	3.72956	-0.0395273	0.385753	0.0153373	0.329355	2.28	0.546	-2.06	0.904
AT1G18520	TET11 (TETRASPANIN11)	4.40531	4.52302	4.44531	-0.0399988	0.363708	0.077703	0.174572	0	2.61	0	0.693
AT1G18530	calmodulin, putative	3.4579	3.43986	3.49806	-0.040157	0.401366	-0.0582	0.267574	1.38	1.18	-0.229	1
AT1G18540	60S ribosomal protein L6 (RPL6A)	9.95512	10.8371	9.34059	0.614534	0.000613871	1.49648	8.09e-07	38700	28000	-0.466	2.92e-06
AT1G18550	kinesin motor protein-related	4.35493	4.81978	4.09578	0.259152	0.00792218	0.723998	5.51e-05	2600	2400	-0.118	0.639
AT1G18560	hAT dimerisation domain-containing protein / BED zinc finger domain-containing protein / transposase-related	4.58405	4.49748	4.52791	0.056133	0.280428	-0.0304304	0.262997	600	618	0.0419	1
AT1G18570	"MYB51 (MYB DOMAIN PROTEIN 51); DNA binding / transcription factor"	3.6241	3.63705	3.61151	0.0125901	0.441401	0.0255416	0.302281	0.242	4.02	4.05	0.591
AT1G18580	"GAUT11 (Galacturonosyltransferase 11); polygalacturonate 4-alpha-galacturonosyltransferase"	6.18191	6.64201	6.26027	-0.0783539	0.211916	0.381741	0.000894094	3700	3240	-0.192	0.188
AT1G18590	sulfotransferase family protein	4.1563	4.16985	4.45627	-0.29997	0.0307907	-0.286418	0.00327735	140	170	0.28	0.554
AT1G18600	rhomboid family protein	5.31255	6.17524	5.35164	-0.0390813	0.376169	0.823603	9.01e-06	1940	2070	0.0881	0.931
AT1G18610	kelch repeat-containing protein	5.07321	4.96683	4.93542	0.13779	0.132497	0.0314097	0.286589	1290	1320	0.0373	1
AT1G18620	NA	6.45765	5.79539	6.33316	0.124496	0.0940414	-0.537768	7.98e-05	6660	6370	-0.0643	0.955
AT1G18630	"GR-RBP6 (glycine-rich RNA-binding protein 6); RNA binding"	5.14662	5.85502	4.9172	0.229426	0.082643	0.937822	6.43e-05	750	635	-0.24	0.302
AT1G18640	PSP (3-PHOSPHOSERINE PHOSPHATASE)	6.57898	7.36412	6.28183	0.297148	0.0165434	1.08229	5.2e-06	3110	2960	-0.0698	0.847
AT1G18650	glycosyl hydrolase family protein 17	8.70748	9.00678	7.73206	0.975413	0.000474947	1.27471	2.21e-05	5270	4960	-0.0884	0.67
AT1G18660	zinc finger (C3HC4-type RING finger) family protein	5.66776	5.77677	5.84861	-0.180857	0.0748863	-0.0718444	0.202428	2970	2990	0.00813	1
AT1G18670	"IBS1 (IMPAIRED IN BABA-INDUCED STERILITY 1); kinase"	4.78328	4.7402	4.48862	0.294659	0.00526591	0.251578	0.00454733	616	697	0.179	0.627
AT1G18680	HNH endonuclease domain-containing protein	6.35293	6.41173	6.2719	0.081027	0.21333	0.139826	0.0747833	374	396	0.0816	0.989
AT1G18690	transferase/ transferase, transferring glycosyl groups	4.66724	4.46374	4.33267	0.334569	0.00548002	0.131072	0.0804189	228	236	0.0492	1
AT1G18700	DNAJ heat shock N-terminal domain-containing protein	6.25779	6.03235	6.33405	-0.0762583	0.223301	-0.301695	0.00131579	4700	4800	0.0316	1
AT1G18710	"AtMYB47 (myb domain protein 47); DNA binding / transcription factor"	3.55341	3.61958	3.89667	-0.343266	0.00889741	-0.277094	0.0115587	81.6	118	0.534	0.333
AT1G18720	NA	8.66217	9.31039	8.90439	-0.242219	0.0149871	0.406001	0.000648558	5310	5500	0.0506	0.798
AT1G18730	NA	3.8588	4.12995	3.76519	0.0936118	0.23553	0.364756	0.00492082	156	163	0.061	0.879
AT1G18735	other RNA	3.39824	3.34109	3.33803	0.0602021	0.36705	0.00305132	0.349401	0	0	0	0
AT1G18740	NA	8.8701	8.60736	8.18652	0.683583	0.00942573	0.420843	0.124207	15900	19600	0.305	0.0262
AT1G18750	"AGL65; DNA binding / transcription factor"	3.97531	3.96497	3.97331	0.00200232	0.468201	-0.00833932	0.336967	282	246	-0.198	0.646
AT1G18760	zinc finger (C3HC4-type RING finger) family protein	3.57591	3.8222	3.64722	-0.0713094	0.340326	0.174975	0.0898378	1.29	5.04	1.96	0.878
AT1G18770	zinc finger (C3HC4-type RING finger) family protein	4.68515	5.14175	4.78733	-0.102186	0.192564	0.354412	0.00535852	1.46	0.885	-0.724	1
AT1G18773	NA	4.38653	4.35848	4.20726	0.179277	0.109335	0.151228	0.0769538	31.3	32.2	0.0406	1
AT1G18780	zinc finger (C3HC4-type RING finger) family protein	3.30496	3.49555	3.34702	-0.0420643	0.345235	0.148529	0.0620248	0	0	0	0
AT1G18790	RWP-RK domain-containing protein	3.32087	3.25039	3.35953	-0.03866	0.397004	-0.109134	0.177663	0.326	0.291	-0.164	1
AT1G18800	"NRP2 (NAP1-RELATED PROTEIN 2); DNA binding / chromatin binding / histone binding"	6.0855	6.83175	5.83093	0.254576	0.0277386	1.00082	1.02e-05	5450	3730	-0.548	2.05e-07
AT1G18810	phytochrome kinase substrate-related	3.48801	3.39435	3.48061	0.00740653	0.456561	-0.0862556	0.150044	0	0.256	0	1
AT1G18830	transducin family protein / WD-40 repeat family protein	3.43195	3.51908	3.53456	-0.102609	0.129058	-0.0154765	0.316079	39.7	29.1	-0.448	0.892
AT1G18835	MIF3 (MINI ZINC FINGER)	5.01198	5.31468	6.30902	-1.29704	0.00711124	-0.994334	0.0110343	0	0	0	0
AT1G18840	"IQD30; calmodulin binding"	5.31157	6.49185	4.89664	0.414922	0.00900633	1.59521	7.41e-07	7580	7000	-0.113	0.579
AT1G18850	NA	6.57711	7.3468	5.7871	0.790012	0.000630545	1.5597	1.49e-06	1490	979	-0.606	0.000314
AT1G18860	"WRKY61 (WRKY DNA-binding protein 61); transcription factor"	3.44981	3.45686	3.55466	-0.10485	0.18432	-0.0977998	0.131446	0	0.315	0	1
AT1G18870	"ICS2; isochorismate synthase"	4.09429	3.81608	4.43873	-0.344435	0.0443237	-0.622644	0.00378455	23.3	28.6	0.297	0.808
AT1G18871	unknown protein	2.81153	3.10487	2.93739	-0.125859	0.23525	0.167481	0.206683	0	0	0	0
AT1G18879	"MIR837a; miRNA"	2.83536	2.9823	3.02347	-0.188111	0.32214	-0.0411713	0.318332	0	0	0	0
AT1G18880	proton-dependent oligopeptide transport (POT) family protein	5.38714	5.8427	5.39781	-0.0106765	0.439385	0.444887	0.00030699	272	323	0.246	0.767
AT1G18890	"ATCDPK1; calmodulin-dependent protein kinase/ kinase/ protein kinase"	5.20266	5.33041	5.28262	-0.0799664	0.19621	0.0477891	0.212598	2140	2400	0.167	0.439
AT1G18900	pentatricopeptide (PPR) repeat-containing protein	5.40383	5.60197	5.26428	0.139552	0.0936735	0.337693	0.000717802	1620	1550	-0.066	0.809
AT1G18910	protein binding / zinc ion binding	3.62008	3.52352	3.56576	0.0543175	0.288543	-0.0422465	0.235589	107	123	0.198	0.895
AT1G18940	nodulin family protein	3.60773	3.76102	3.70066	-0.0929317	0.238754	0.0603625	0.214163	10.3	16.1	0.65	0.929
AT1G18950	aminoacyl-tRNA synthetase family	5.35535	5.18883	5.15576	0.199592	0.0255543	0.0330669	0.271603	3320	3380	0.0228	1
AT1G18960	myb family transcription factor	3.54482	3.73705	3.56726	-0.0224421	0.42861	0.169786	0.050324	1.79	2.08	0.222	1
AT1G18970	"GLP4 (GERMIN-LIKE PROTEIN 4); manganese ion binding / metal ion binding / nutrient reservoir"	3.93166	4.05841	3.8957	0.0359546	0.389334	0.162703	0.119774	0	0	0	0
AT1G18980	germin-like protein, putative	3.76544	4.00021	4.01908	-0.253636	0.0290905	-0.0188693	0.321597	0	0	0	0
AT1G18990	NA	3.56532	3.4898	3.54325	0.0220705	0.393353	-0.0534549	0.185927	10.5	9.85	-0.0883	0.968
AT1G19000	myb family transcription factor	6.91381	5.24719	7.09294	-0.179131	0.0342453	-1.84575	8.61e-07	627	845	0.43	0.00636
AT1G19010	NA	5.33665	5.19725	5.79763	-0.460973	0.00132924	-0.60038	3.61e-05	408	381	-0.0996	0.883
AT1G19020	NA	4.29539	3.98561	4.82238	-0.526988	0.0225273	-0.836773	0.000103869	10.2	13	0.35	1
AT1G19025	DNA cross-link repair protein-related	4.41255	4.541	4.20587	0.20668	0.0361707	0.335124	0.00247771	482	367	-0.395	0.139
AT1G19030	transposable element gene	3.64286	3.72107	3.63453	0.00832683	0.4547	0.0865362	0.146168	0.731	0.511	-0.516	1
AT1G19040	transcription factor	3.27129	3.22868	3.20277	0.0685217	0.345422	0.0259162	0.317734	0	0	0	0
AT1G19050	"ARR7 (RESPONSE REGULATOR 7); transcription regulator/ two-component response regulator"	3.71088	4.60096	3.80262	-0.0917378	0.225267	0.798334	0.000193598	105	66.2	-0.673	0.16
AT1G19060	NA	4.07499	4.1444	4.17782	-0.102826	0.208766	-0.0334235	0.252579	0.969	0.315	-1.62	0.989
AT1G19070	F-box family protein	2.98715	3.00546	3.05651	-0.0693618	0.307166	-0.0510493	0.270982	80.3	80.1	-0.00393	1
AT1G19080	TTN10 (TITAN 10)	5.84275	5.79043	5.52489	0.317861	0.14268	0.265543	0.125975	868	869	0.00229	1
AT1G19080	TTN10 (TITAN 10)	4.88823	4.82534	4.70767	0.18056	0.17315	0.11767	0.184981	868	869	0.00229	1
AT1G19086	unknown protein	3.56059	3.50959	3.51801	0.0425761	0.415753	-0.00842353	0.347204	0	0	0	0
AT1G19090	"RKF2 (RECEPTOR-LIKE SERINE/THREONINE KINASE 2); kinase"	3.31661	3.34559	3.34838	-0.0317655	0.366265	-0.00278928	0.350288	6.98	1.64	-2.09	0.572
AT1G19100	ATP-binding region, ATPase-like domain-containing protein-related	5.03415	5.08156	4.81728	0.216873	0.0262945	0.264284	0.00371947	2670	2540	-0.0716	1
AT1G19110	inter-alpha-trypsin inhibitor heavy chain-related	6.28705	6.23292	6.17355	0.113504	0.148745	0.059374	0.231146	5670	5330	-0.091	0.563
AT1G19115	other RNA	3.32139	3.13938	3.25823	0.0631646	0.338634	-0.118844	0.133204	9.91	5.09	-0.961	0.982
AT1G19120	small nuclear ribonucleoprotein, putative / snRNP, putative / Sm protein, putative	8.6726	8.85153	8.41742	0.255184	0.00922867	0.434111	0.000221678	3110	2950	-0.0765	0.866
AT1G19130	NA	8.28561	8.67656	8.05979	0.225812	0.0659891	0.616763	8.07e-05	2210	2250	0.0238	0.893
AT1G19140	NA	6.98829	7.70598	6.67024	0.318051	0.00745744	1.03575	6.58e-06	2700	2630	-0.0344	1
AT1G19150	"LHCA6 (Photosystem I light harvesting complex gene 6); chlorophyll binding"	5.18547	4.78002	4.88378	0.301684	0.0156989	-0.103761	0.087502	45.9	27	-0.767	0.373
AT1G19160	F-box family protein-related	3.58184	5.24401	3.81255	-0.230709	0.0924344	1.43147	9.89e-07	51.7	0.826	-5.97	4.15e-12
AT1G19170	glycoside hydrolase family 28 protein / polygalacturonase (pectinase) family protein	6.04407	6.16667	5.83657	0.207502	0.0224829	0.330108	0.00100447	1600	1760	0.135	0.537
AT1G19180	"JAZ1/TIFY10A (JASMONATE-ZIM-DOMAIN PROTEIN 1); protein binding"	7.75081	7.67327	7.56154	0.189266	0.225968	0.111728	0.266878	8520	10500	0.308	0.76
AT1G19190	hydrolase	4.43407	9.15275	4.51265	-0.078582	0.320659	4.6401	3.01e-08	1640	1450	-0.182	0.475
AT1G19200	senescence-associated protein-related	6.75765	4.68807	8.33757	-1.57992	0.000168402	-3.6495	7.53e-07	25.2	22.2	-0.181	1
AT1G19210	AP2 domain-containing transcription factor, putative	5.27637	5.66064	4.64255	0.633815	0.00845804	1.01809	0.061222	240	420	0.808	0.0337
AT1G19220	"ARF19 (AUXIN RESPONSE FACTOR 11); transcription factor"	4.26844	4.00167	4.26288	0.00555861	0.458123	-0.261211	0.00251048	866	907	0.0669	1
AT1G19230	respiratory burst oxidase protein E (RbohE) / NADPH oxidase	3.66857	3.68345	3.71629	-0.0477143	0.344745	-0.0328419	0.258925	257	311	0.274	0.511
AT1G19240	NA	7.26053	7.76633	6.88032	0.380215	0.0118409	0.886009	9.99e-05	443	440	-0.00697	1
AT1G19250	"FMO1 (FLAVIN-DEPENDENT MONOOXYGENASE 1); monooxygenase"	3.42817	3.45994	3.46118	-0.0330119	0.365707	-0.0012418	0.352504	0.326	0.256	-0.349	1
AT1G19270	ubiquitin interaction motif-containing protein / LIM domain-containing protein	5.44137	5.57334	5.89022	-0.448844	0.00147416	-0.316872	0.00396594	1300	1480	0.184	0.42
AT1G19290	pentatricopeptide (PPR) repeat-containing protein	4.23037	4.21456	3.9932	0.237163	0.0343697	0.221353	0.0160206	848	846	-0.00288	1
AT1G19300	"GATL1/GLZ1/PARVUS (GALACTURONOSYLTRANSFERASE-LIKE 1); polygalacturonate 4-alpha-galacturonosyltransferase/ transferase, transferring glycosyl groups / transferase, transferring hexosyl groups"	4.91827	4.74361	5.02312	-0.104852	0.173173	-0.279503	0.0108512	134	227	0.756	0.00298
AT1G19310	zinc finger (C3HC4-type RING finger) family protein	7.64872	7.52015	7.71424	-0.065529	0.257432	-0.19409	0.0102181	851	913	0.101	0.902
AT1G19320	pathogenesis-related thaumatin family protein	3.8102	3.84649	3.93718	-0.126988	0.153892	-0.0906897	0.18439	4.63	20.2	2.12	0.24
AT1G19330	NA	10.2167	8.96232	10.0447	0.172017	0.0286685	-1.08235	1.18e-06	7300	9350	0.357	0.000147
AT1G19340	methyltransferase MT-A70 family protein	5.71342	5.25709	5.7121	0.00132407	0.470678	-0.455006	0.000132385	839	910	0.118	0.483
AT1G19350	"BES1 (BRI1-EMS-SUPPRESSOR 1); transcription regulator"	6.45755	6.64243	6.21207	0.245483	0.019311	0.430361	0.000430262	3540	4240	0.257	0.0156
AT1G19360	NA	7.61655	7.85642	7.67424	-0.0576909	0.274119	0.18218	0.0125591	6180	5920	-0.063	0.872
AT1G19370	NA	5.49579	5.59761	5.3909	0.104888	0.134815	0.206714	0.0216334	2070	1890	-0.128	0.57
AT1G19371	"MIR169H; miRNA"	3.66147	3.85712	3.84329	-0.181815	0.0674304	0.0138347	0.342224	0	0	0	0
AT1G19373	snoRNA	5.61975	7.05903	5.40531	0.214434	0.222365	1.65372	0.000203996	0	0	0	0
AT1G19376	snoRNA	4.37721	4.40346	4.34929	0.0279183	0.449156	0.0541697	0.317146	0	0	0	0
AT1G19380	NA	7.78996	7.25636	8.55012	-0.760157	0.000936989	-1.29376	0.00169644	422	550	0.382	0.738
AT1G19390	wall-associated kinase, putative	3.53056	3.70812	3.58394	-0.053383	0.318558	0.124174	0.0699691	3.9	2.69	-0.538	1
AT1G19394	unknown protein	3.97819	3.54368	3.9514	0.0267893	0.454434	-0.407728	0.08912	61.1	108	0.825	0.197
AT1G19397	unknown protein	4.26548	3.95477	4.34587	-0.080383	0.268696	-0.391093	0.0189171	280	333	0.25	0.371
AT1G19400	NA	6.83754	6.12113	6.77226	0.0652782	0.284133	-0.651126	8.4e-05	1570	1730	0.134	0.869
AT1G19410	NA	3.30173	3.72418	3.31007	-0.00833083	0.456684	0.414117	0.00320962	2.35	5.93	1.34	0.936
AT1G19415	transposable element gene	3.54824	3.40162	3.80773	-0.259492	0.0144933	-0.406106	0.000595877	11.8	22.2	0.916	0.518
AT1G19430	dehydration-responsive protein-related	5.68449	5.67517	6.05029	-0.365797	0.00633144	-0.375124	0.00335083	3170	3330	0.0725	0.939
AT1G19440	very-long-chain fatty acid condensing enzyme, putative	6.16699	7.23963	6.294	-0.127006	0.133463	0.945637	1.52e-05	2860	2240	-0.356	0.00274
AT1G19450	integral membrane protein, putative / sugar transporter family protein	5.69671	6.62852	6.60617	-0.909467	0.000130605	0.0223428	0.297594	2580	2150	-0.264	0.0701
AT1G19460	kelch repeat-containing F-box family protein	3.25627	3.22888	3.40358	-0.147311	0.232388	-0.174701	0.0927958	0	46.2	0	3.67e-11
AT1G19470	kelch repeat-containing F-box family protein	3.4851	3.55333	3.37492	0.110185	0.187172	0.178414	0.11794	18.7	10.8	-0.79	0.647
AT1G19480	HhH-GPD base excision DNA repair family protein	6.1698	6.34803	5.87363	0.296177	0.0153057	0.474405	0.000403868	1230	1290	0.0688	0.835
AT1G19485	AT hook motif-containing protein	4.9964	4.84272	4.93119	0.0652074	0.285703	-0.0884705	0.123312	1950	1990	0.0333	0.986
AT1G19490	bZIP transcription factor family protein	4.21262	4.28198	4.37147	-0.15885	0.0675365	-0.0894868	0.105726	461	471	0.0316	1
AT1G19500	NA	3.5922	4.0483	3.53635	0.0558525	0.339044	0.511953	0.00448385	25.7	25.6	-0.00959	1
AT1G19510	myb family transcription factor	3.18212	3.20804	3.21495	-0.0328347	0.376786	-0.00690776	0.342925	0	0	0	0
AT1G19520	"NFD5 (NUCLEAR FUSION DEFECTIVE 5); transcription factor"	4.57453	5.24296	4.1937	0.380828	0.00321753	1.04926	0.000137822	5240	4130	-0.344	0.00026
AT1G19530	NA	3.66808	3.31613	3.91628	-0.248198	0.109376	-0.600151	0.00214922	1.3	0	0	0.887
AT1G19540	isoflavone reductase, putative	4.30567	3.93013	3.98869	0.31698	0.0907744	-0.0585531	0.245644	20.9	19.7	-0.0895	1
AT1G19570	"DHAR1 (DEHYDROASCORBATE REDUCTASE); glutathione dehydrogenase (ascorbate)"	6.98171	8.31613	6.48846	0.493255	0.00812519	1.82768	3.81e-07	63500	57100	-0.153	0.25
AT1G19580	"GAMMA CA1 (GAMMA CARBONIC ANHYDRASE 1); carbonate dehydratase"	6.91896	7.65334	6.79043	0.128528	0.118394	0.862914	6.35e-06	4000	3620	-0.144	0.257
AT1G19600	pfkB-type carbohydrate kinase family protein	7.49494	7.43669	6.97204	0.522893	0.00289423	0.464643	0.00155544	1520	1400	-0.12	0.989
AT1G19610	LCR78/PDF1.4 (Low-molecular-weight cysteine-rich 78)	3.75599	3.7242	5.35559	-1.5996	2.89e-05	-1.63139	4.58e-07	0	0.546	0	1
AT1G19620	unknown protein	4.13436	3.98241	4.15083	-0.016475	0.448123	-0.168418	0.115482	0.242	0.767	1.66	1
AT1G19630	"CYP722A1 (cytochrome P450, family 722, subfamily A, polypeptide 1); oxygen binding"	3.50429	4.42549	3.44212	0.0621739	0.321967	0.98337	2.87e-05	344	236	-0.547	0.0303
AT1G19640	"JMT (JASMONIC ACID CARBOXYL METHYLTRANSFERASE); jasmonate O-methyltransferase"	3.71282	6.40715	3.63765	0.0751653	0.286173	2.7695	2.23e-07	434	328	-0.405	0.139
AT1G19650	SEC14 cytosolic factor, putative / phosphoglyceride transfer protein, putative	4.56546	4.62759	4.59874	-0.0332771	0.380058	0.0288513	0.284569	1490	1570	0.0725	0.618
AT1G19660	wound-responsive family protein	7.43299	5.98566	7.47041	-0.0374202	0.332596	-1.48475	7.64e-07	1570	3430	1.13	4.19e-09
AT1G19670	ATCLH1 (CORONATINE-INDUCED PROTEIN 1)	6.55827	6.12223	6.00009	0.55818	0.000919121	0.12214	0.0911109	1760	3440	0.966	4.74e-21
[truncated: 27,589 more rows]
