# Supplementary figures and images for: Auxin production in the endosperm drives seed coat development in Arabidopsis
Source: eLife journal article supplement (doi:10.7554/elife.20542), 2016-11-15

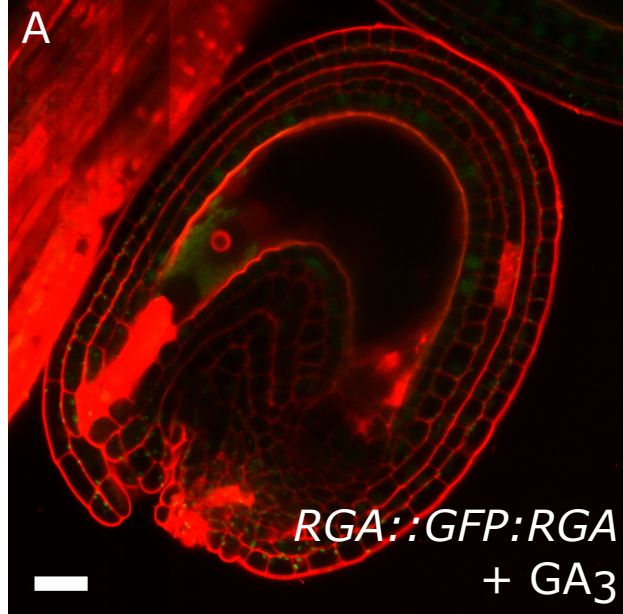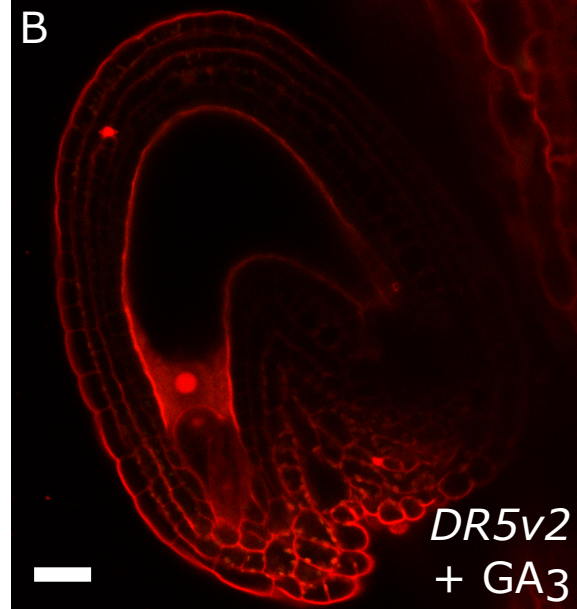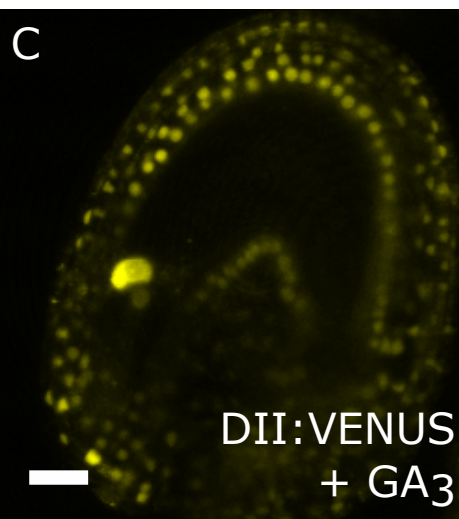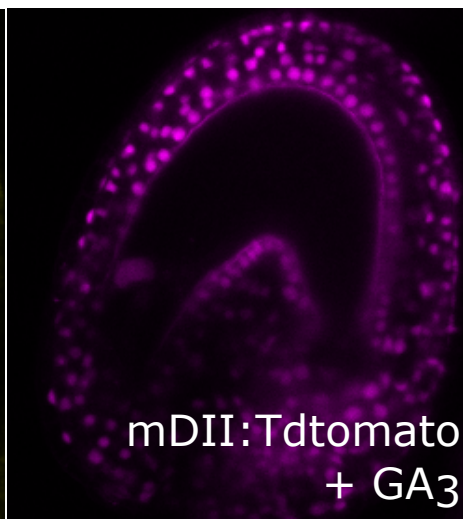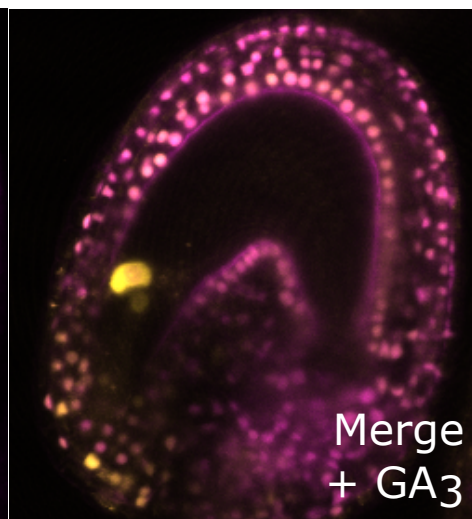

Supplement: supp [file elife_poa_e20542_Figure_1_figure_supplement_1.pdf › elife_poa_e20542_Figure_1_figure_supplement_1.pdf]

**A**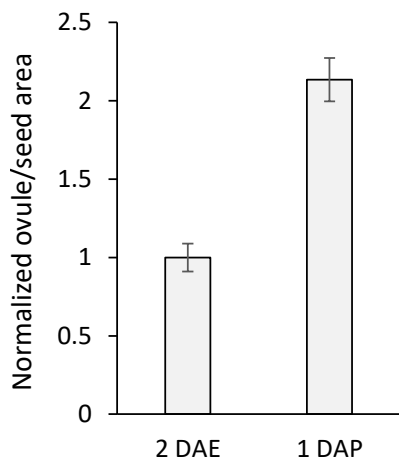**B**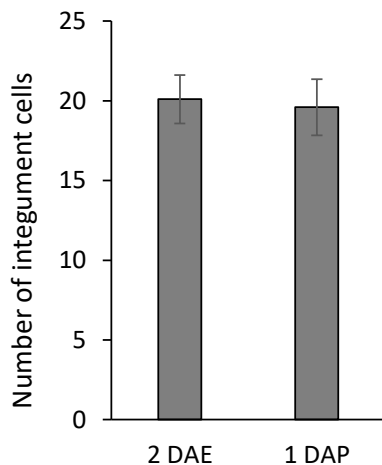**C**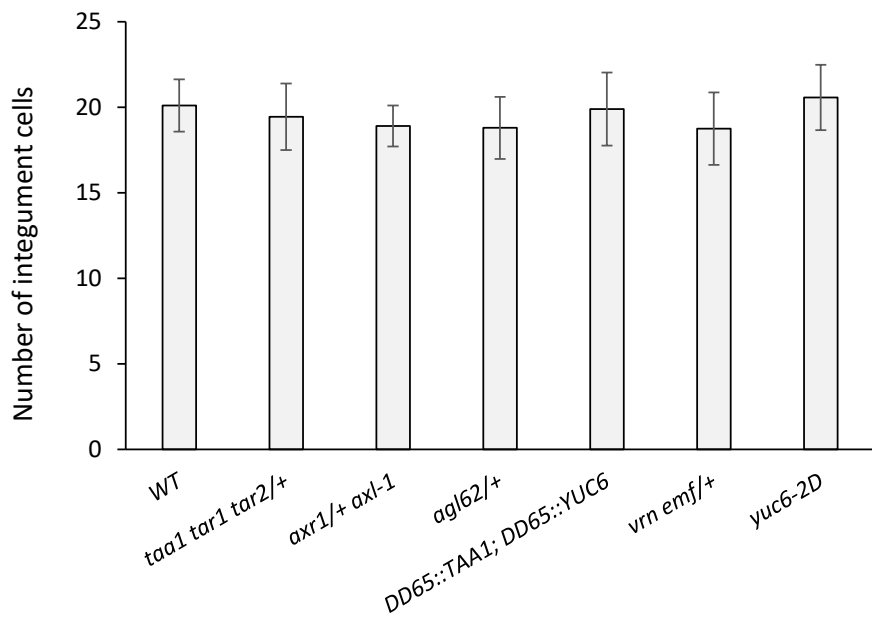

Supplement: supp [file elife_poa_e20542_Figure_1_figure_supplement_2.pdf › elife_poa_e20542_Figure_1_figure_supplement_2.pdf]

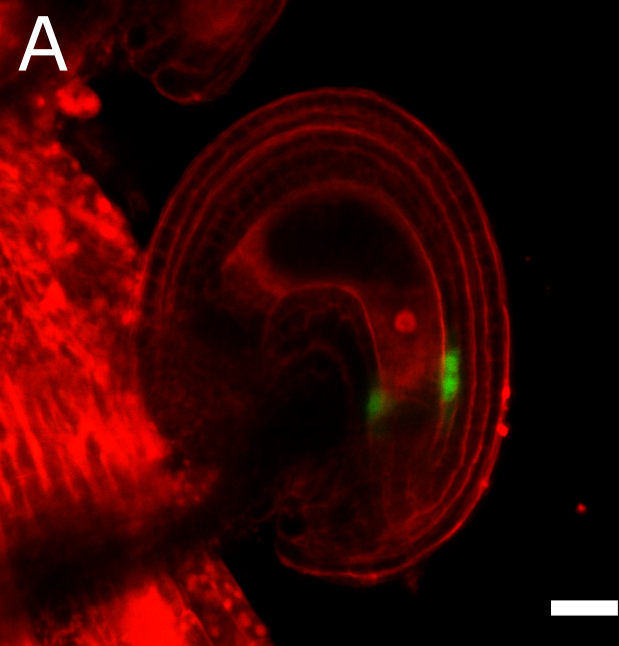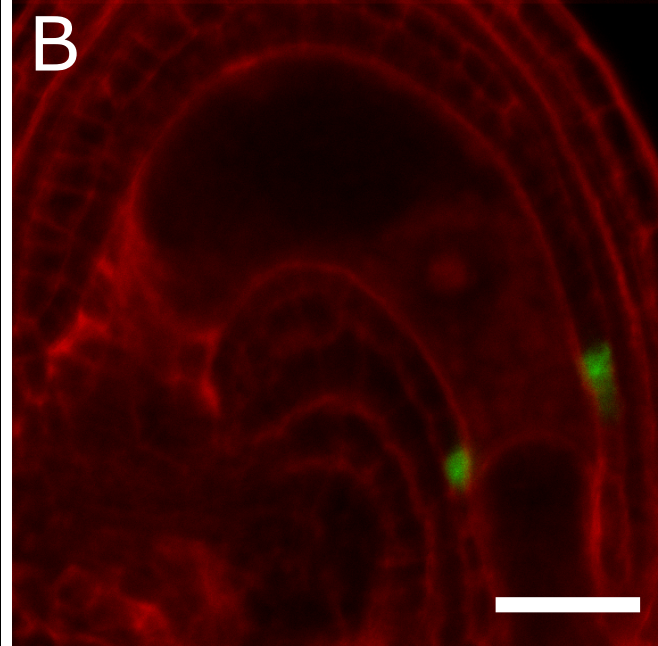

Supplement: supp [file elife_poa_e20542_Figure_2_figure_supplement_1.pdf › elife_poa_e20542_Figure_2_figure_supplement_1.pdf]

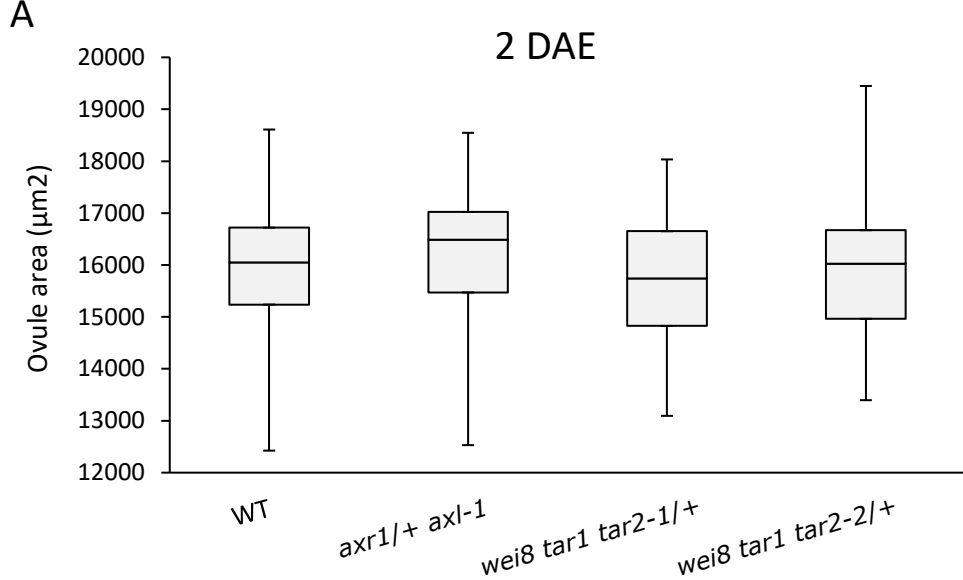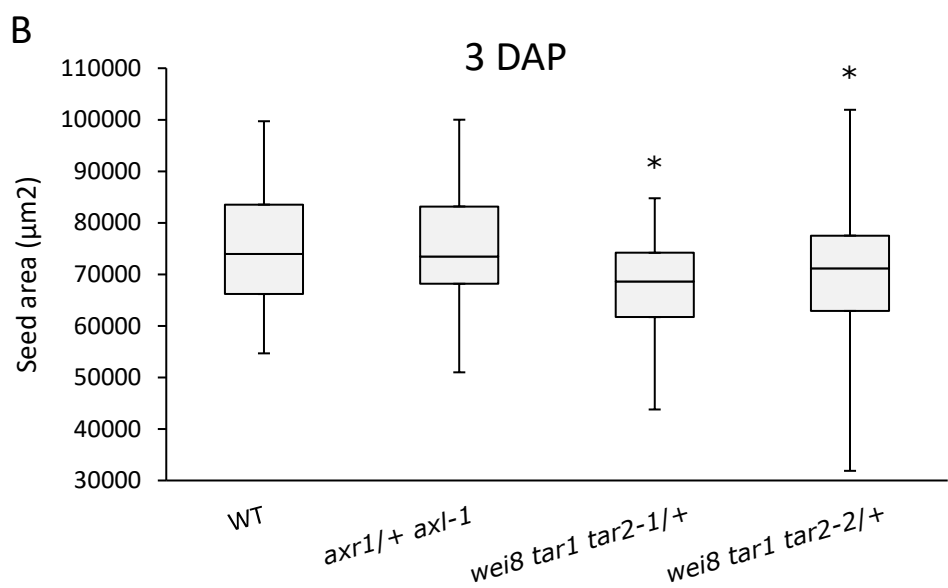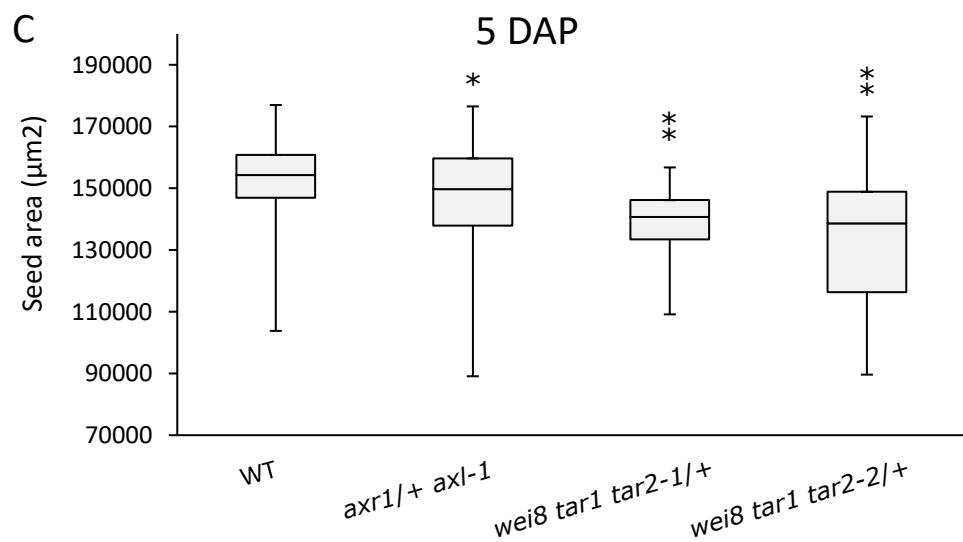

Supplement: supp [file elife_poa_e20542_Figure_3_figure_supplement_1.pdf › elife_poa_e20542_Figure_3_figure_supplement_1.pdf]

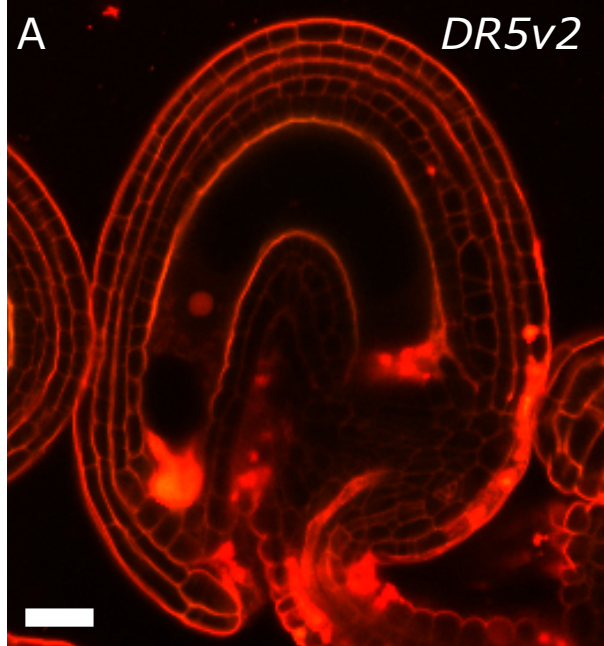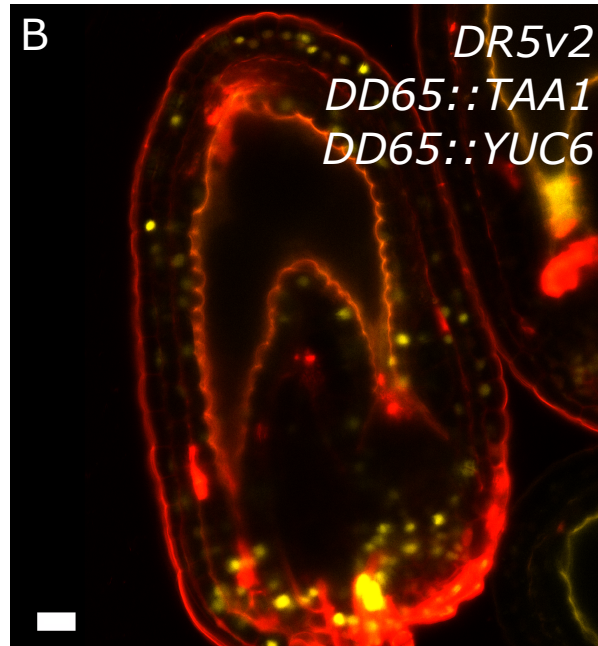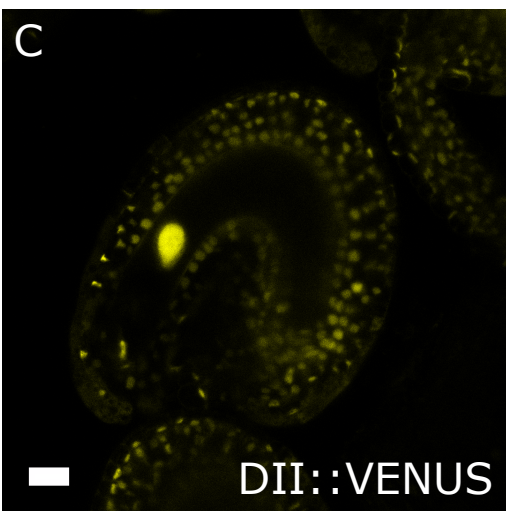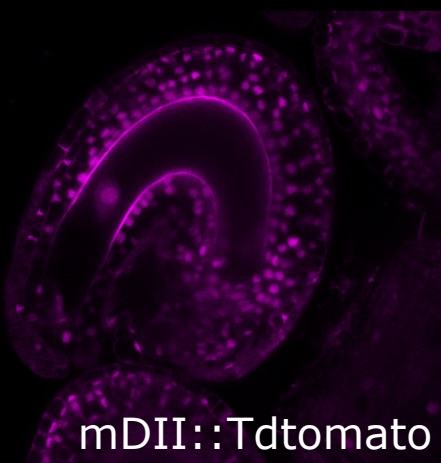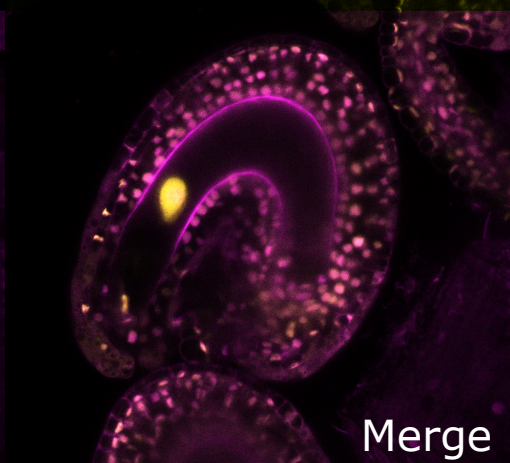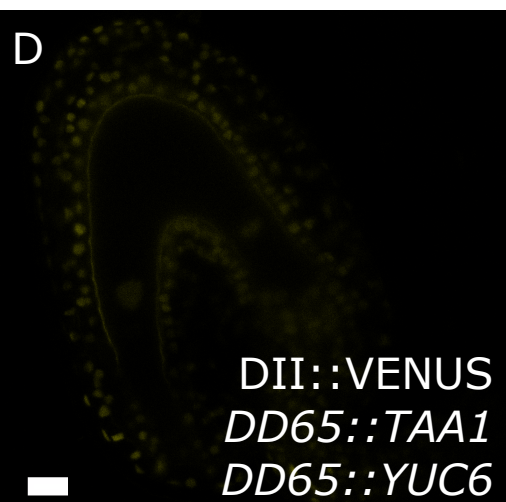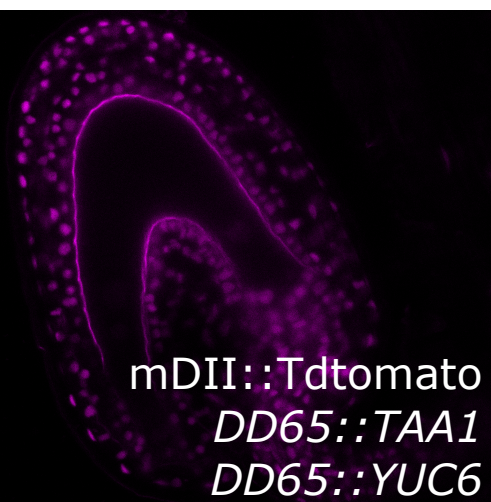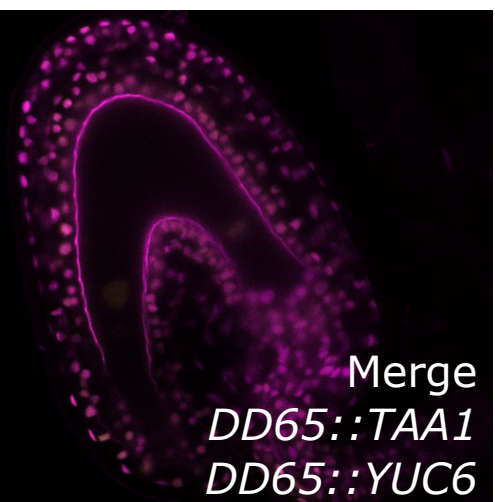

Supplement: supp [file elife_poa_e20542_Figure_4_figure_supplement_1.pdf › elife_poa_e20542_Figure_4_figure_supplement_1.pdf]

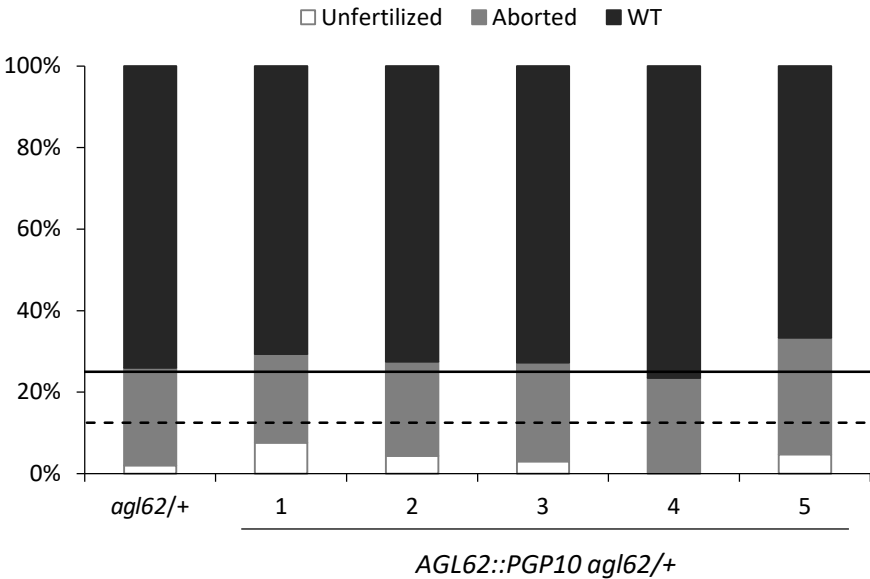

Supplement: supp [file elife_poa_e20542_Figure_5_figure_supplement_1.pdf › elife_poa_e20542_Figure_5_figure_supplement_1.pdf]

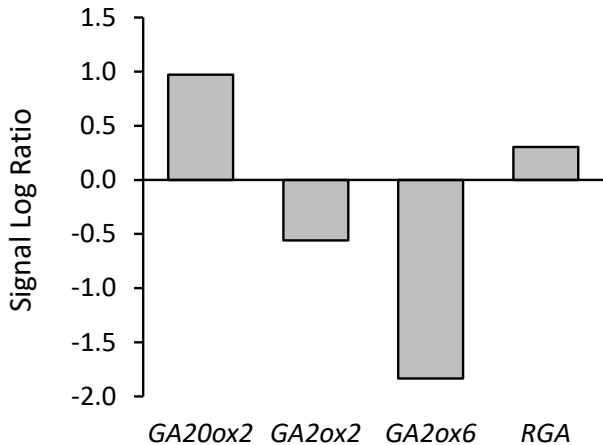

Supplement: supp [file elife_poa_e20542_Figure_6_figure_supplement_1.pdf › elife_poa_e20542_Figure_6_figure_supplement_1.pdf]

A

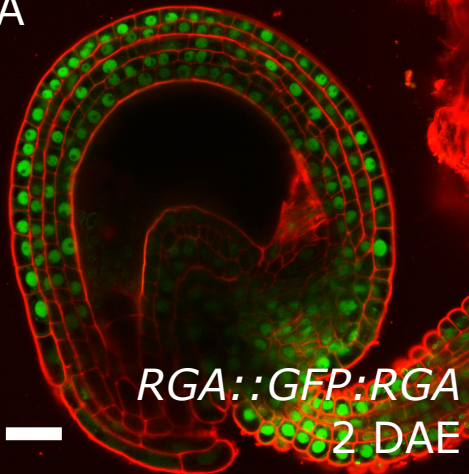

B

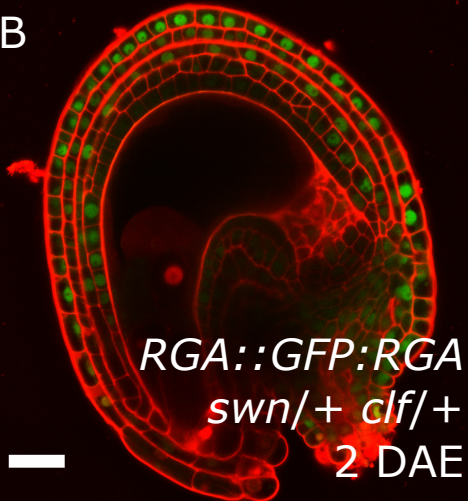

Supplement: supp [file elife_poa_e20542_Figure_6_figure_supplement_2.pdf › elife_poa_e20542_Figure_6_figure_supplement_2.pdf]

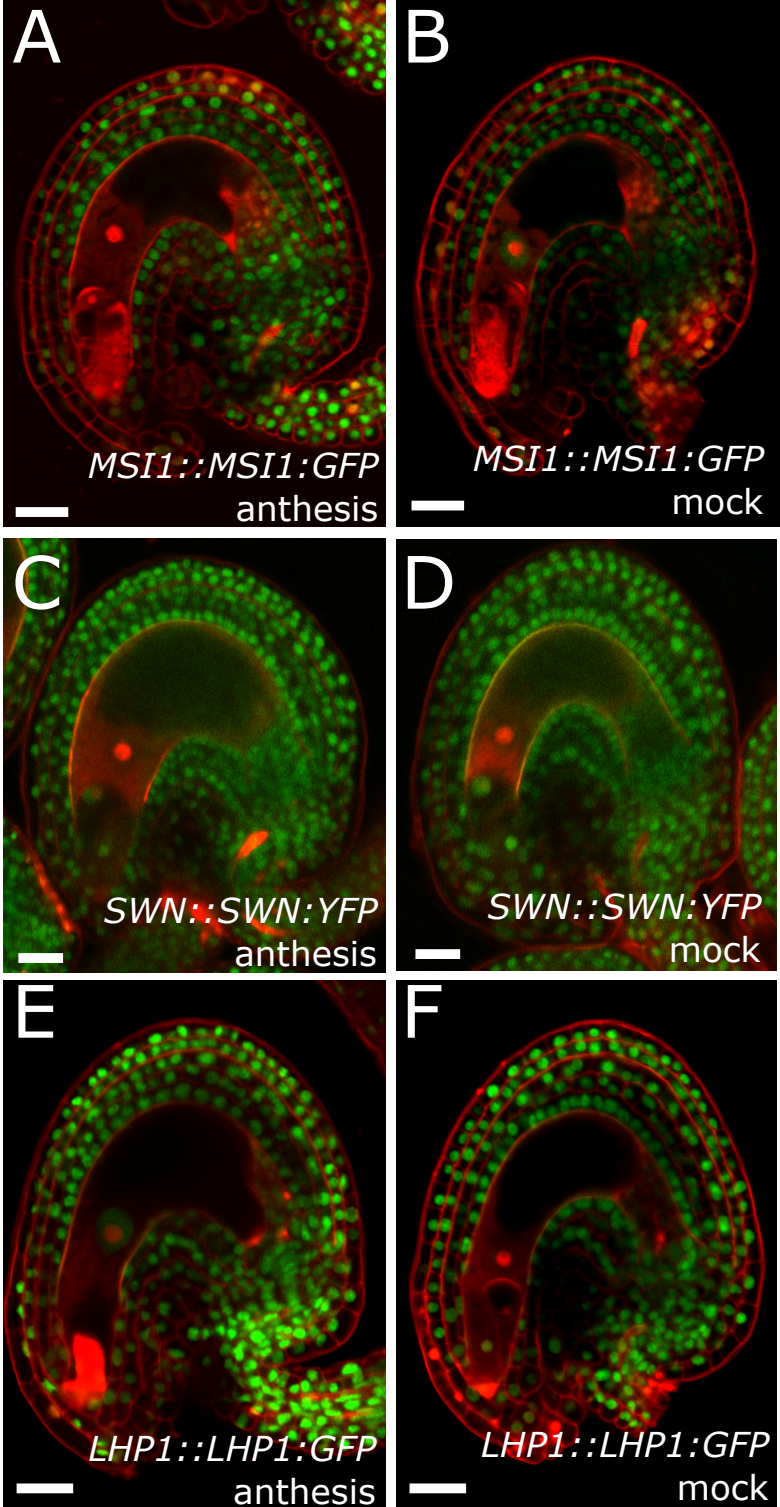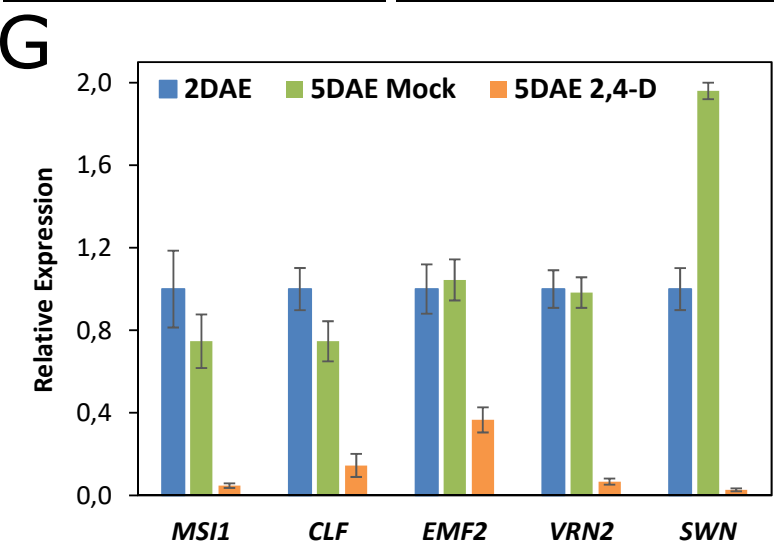

Supplement: supp [file elife_poa_e20542_Figure_7_figure_supplement_1.pdf › elife_poa_e20542_Figure_7_figure_supplement_1.pdf]
